# Supplementary material for: Seasonal study of stable carbon and nitrogen isotopic composition in fine aerosols at a Central European rural background station
Source: Copernicus journal article supplement (doi:10.5194/acp-2018-604), 2018-09-12
Supplement: Supplementary file 1 [file acp-2018-604-supplement.pdf]

### Supplementary Information:

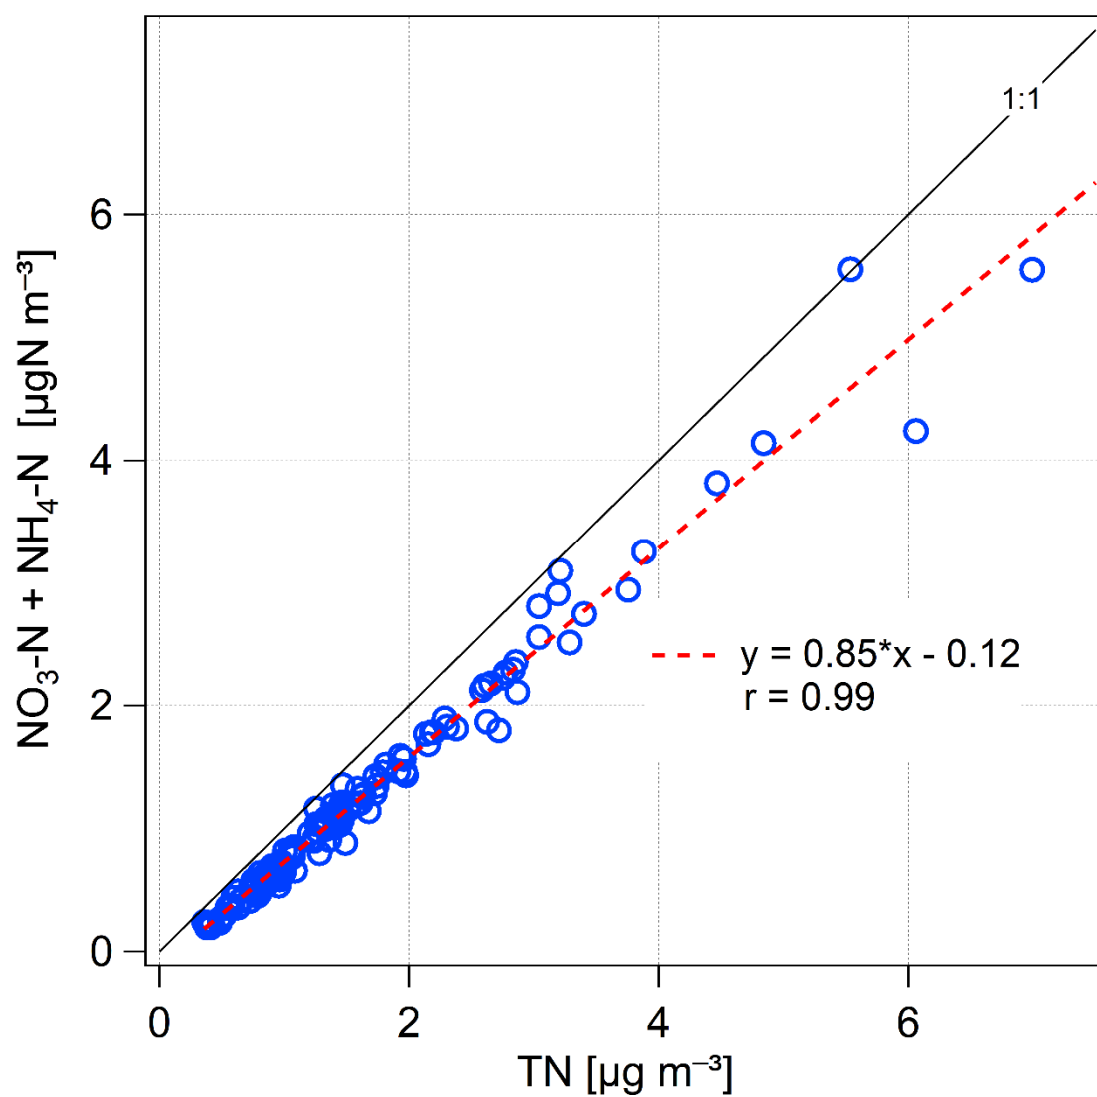

Fig. S1: Relationship of the sum of nitrate and ammonium nitrogen measured by ion chromatography to the total aerosol nitrogen measured by EA.

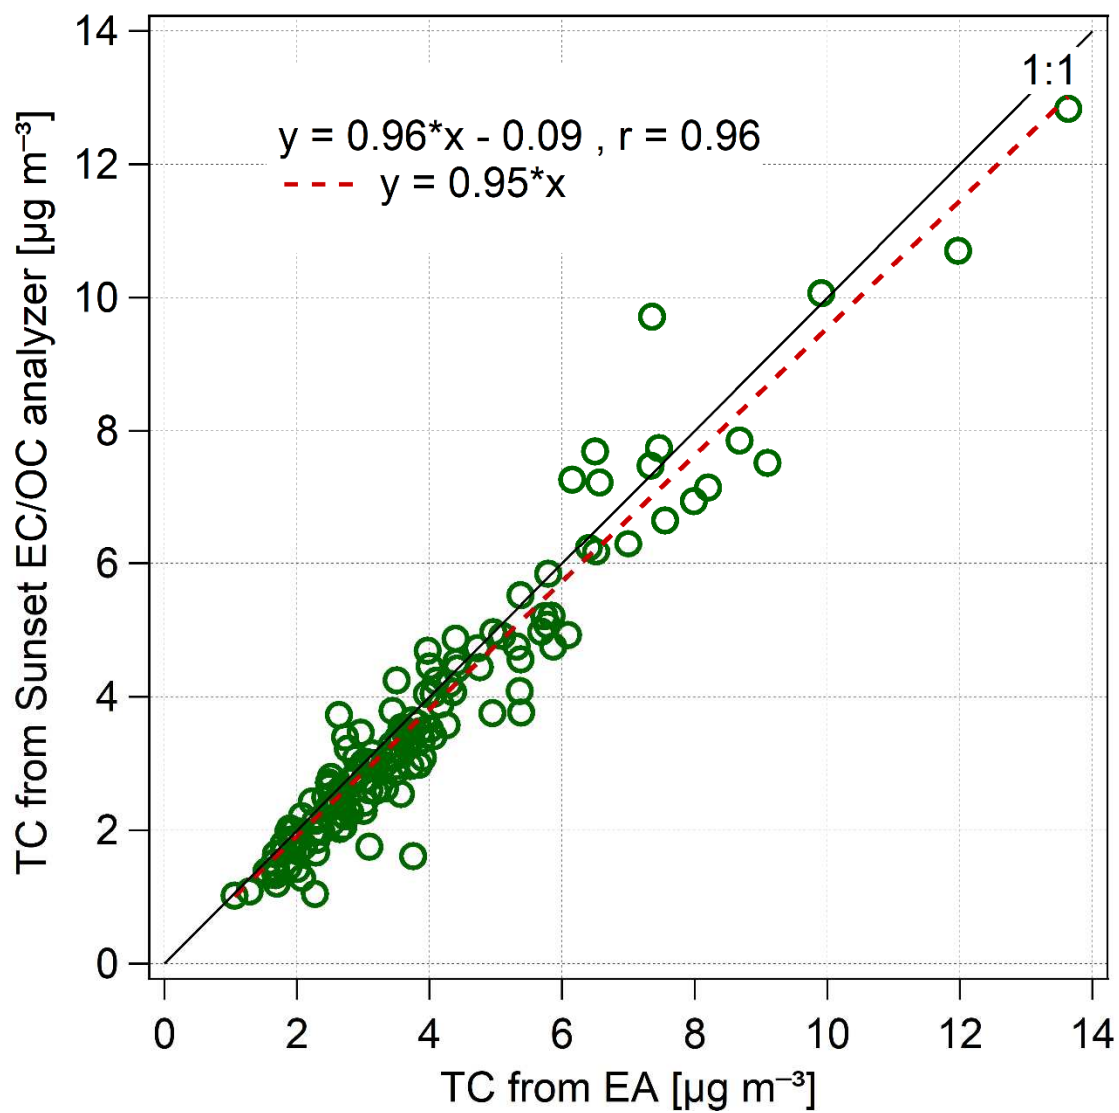

Fig. S2: Comparison of TC from EA-IRMS and TC from the EC/OC analyzer measured in parallel to filter sampling (both PM1 aerosols).

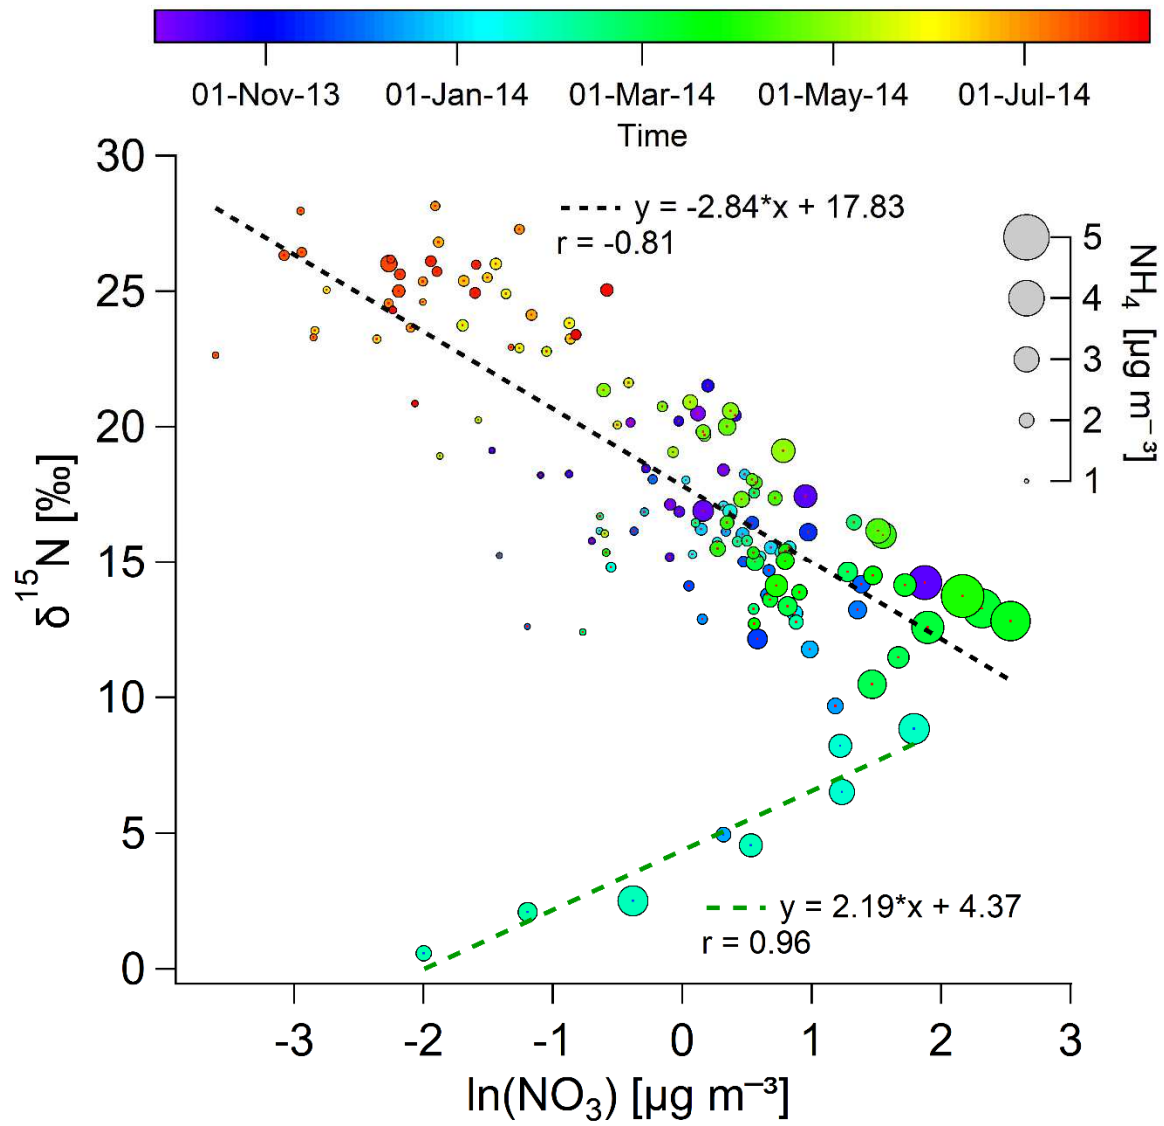

Fig. S3: Relationships of  $\delta^{15}\text{N}$  in TN vs. the natural logarithm of  $\text{NO}_3^-$  concentrations. The larger circles indicate higher  $\text{NH}_4^+$  concentrations. The color scale reflects the time of sample collection.

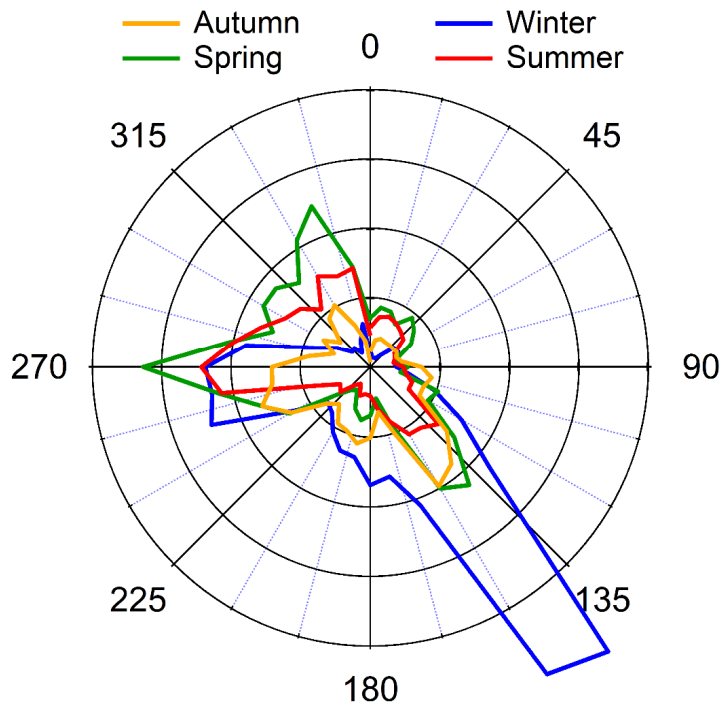

Fig. S4: Wind directions in different seasons during the measurement campaign.

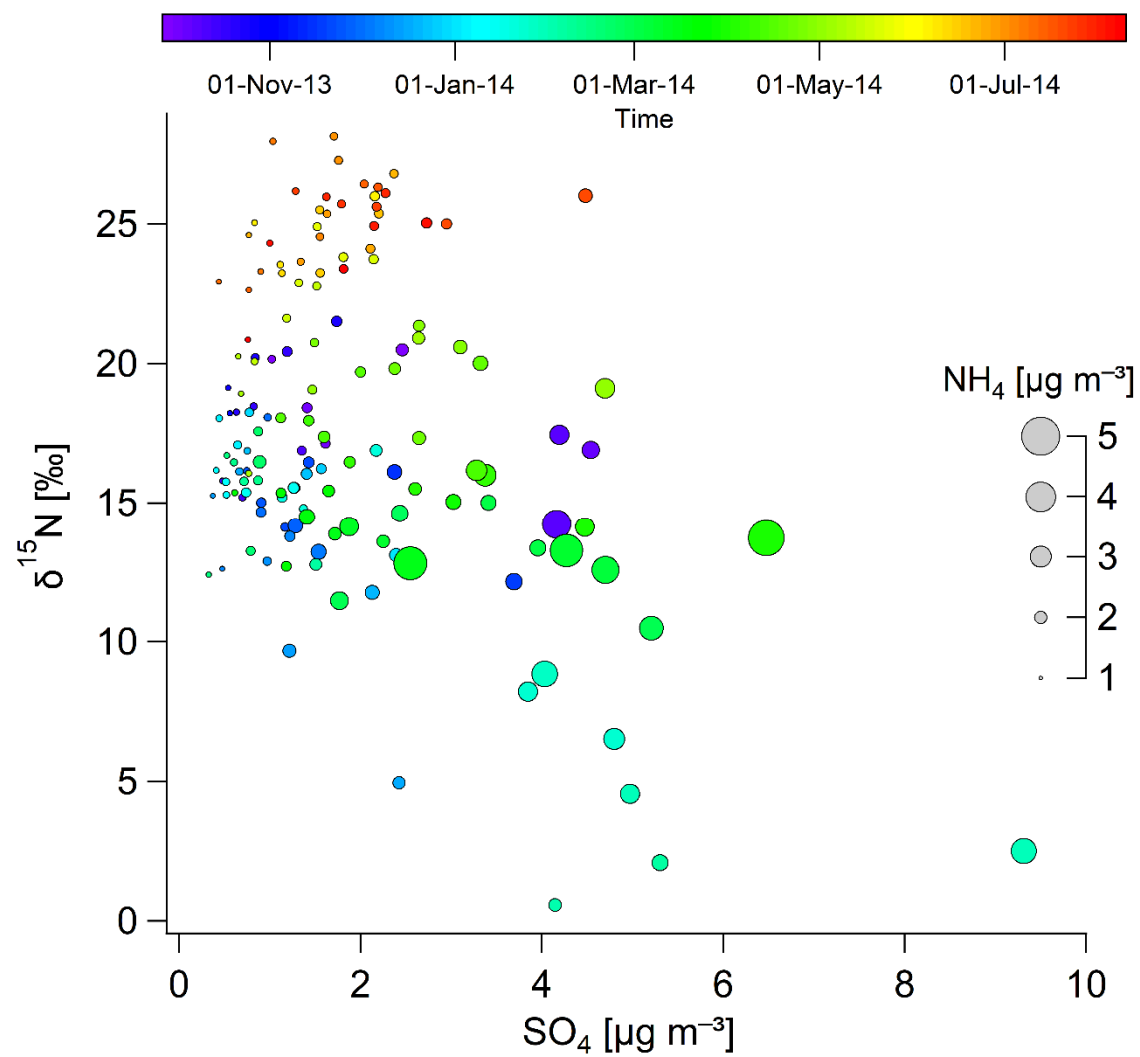

Fig. S5: Relationships of  $\delta^{15}\text{N}$  in TN vs.  $\text{SO}_4^{2-}$  concentrations. The larger circles indicate higher  $\text{NH}_4^+$  concentrations. The color scale reflects the time of sample collection.
