# Supplementary material for: Seasonal study of stable carbon and nitrogen isotopic composition in fine aerosols at a Central European rural background station
Source: Copernicus journal article supplement (doi:10.5194/acp-2018-604), 2018-09-12
Supplement: Supplementary file [file acp-2018-604-AC2-supplement.pdf]

## Response to anonymous Referee RC2

We would like to thank the reviewer for his valuable and helpful comments. Based on this, we have changed a part of the manuscript which led to an improvement in the final text. Responses to specific comments are below.

This paper presents seasonal variations of d15N and d13C in ambient aerosol collected in Košetice (Central Europe) between 27 September 2013 and 9 August 2014. The authors show an impressive series of measurements aiming to investigate sources and processing of the fine fraction of aerosol at a rural background site. This study using two-isotope analysis is very suitable for this goal.

The use of multiple isotope ratios for the study of atmospheric pollution and the chemistry of organic compounds in the atmosphere is a newly emerging tool. The manuscript contributes to scientific progress within the scope of the journal; therefore, it is suitable to be published for discussions in ACP. Both description and discussion of measurements are well founded. Unfortunately, the presentation is not on the same level, therefore it needs to be substantially improved before publishing.

General comments:

1) The authors discuss the benefits of using isotopes in the atmospheric research. These can give some hints to information, which is not available from concentration measurements, such as the impact of sources vs. processing on measured delta values. I miss though a discussion on the current limitations of using isotope ratio measurements for the above mentioned purpose. This omission might be the reason why the interpretation sounds sometimes so futile.

Example: Lines 262-263 'In the case of our data, mixing of all of these factors probably had an influence on the nitrate isotopic composition during different parts of the year.'

Reformulate!

Response: Thank you for this comment. We added following text referring to the current limitations of using isotope ratio measurements in first paragraph of Introduction chapter.

*"However, studies based on single isotope analysis have their limitations (Meier-Augenstein and Kemp, 2012). Those include an uncertainty when multiple sources or different processes are present, whose measured delta values may overlap (typically in the narrower  $\delta^{13}\text{C}$  range). Another factor are isotope fractionation processes which may constrain the accuracy of source identification (Xue et al., 2009). Using isotope analysis on multiple phases (gas and particulate matter) or multiple isotope analysis can overcome these problems and may be useful to constrain the potential sources/processes."*

Specific text on lines 262-263 were changed to the following sentence: *"In our study, it is most likely that all these factors contributed, to a certain extent, to the nitrogen isotopic composition of  $\text{NO}_3^-$  throughout the year."*

2) The introduction should make the reader aware of the importance of using multiple isotopes (literature sources are required), e.g. for constraining potential sources. The sentence on the Lines 85-

86 is too late and too less. A proper foreword would bring more structure in the discussion from Lines59-83. Here the authors must clearly differentiate between single and multiple isotope analyses.

Response: We extended Introduction chapter about examples of studies using multi isotope analyses. The sentence from the lines 85-86 we slightly modified and moved at the end of this paragraph. New text related to studies with multiple isotope measurements in Introduction chapter is following:

*“Recently, the multiple isotope approach was applied in several studies by using  $\delta^{13}\text{C}$  and  $\delta^{15}\text{N}$  measurements. Specifically, the  $\delta^{13}\text{C}$  and  $\delta^{15}\text{N}$  composition of aerosol (along with other supporting data) was used to identify the sources and processes on marine sites in Asia (Bikkina et al., 2016; Kunwar et al., 2016; Miyazaki et al., 2011; Xiao et al., 2018). Same isotopes were used to determine the contribution of biomass burning to organic aerosols in India (Boreddy et al., 2018) and in Tanzania (Mkoma et al., 2014), or to unravel the sources of aerosol contamination at Cuban rural and urban coastal sites (Morera-Gómez et al., 2018). These studies show the potential advantages of  $\delta^{13}\text{C}$  and  $\delta^{15}\text{N}$  isotope ratios to characterize aerosol types and to reveal the underlying chemical processes that take place in them.”*

We also added data on other isotope analyzes (if were performed) to distinguish single- and multi-isotope studies in paragraph related to European studies

3) Separate Spearman from Pearson correlation coefficients. For that purpose, label them for each use (e.g. in Line203).

Response: Thank you for this comment. We identified in text few Pearson's correlation coefficients (connected with Figures 2, 3 and 7) instead of Spearman's ones. Although each of these coefficients provides different information (Pearson benchmarks linear relationship, Spearman benchmarks monotonic relationship), the values in our work are same or similar (e.g. for TC vs. TN is  $r(P)$ : 0.70 and  $r(S)$ : 0.71). Based on this, we decided to use only Spearman correlation coefficients in this work. Changes were made in Figures 2, 3 and 7, and related text (original lines 203, 213). Currently, Spearman's correlations are used throughout the document so there is no need to differentiate it from Pearson's correlations.

4) Name the described variables throughout the manuscript!

Some examples: Line122: Replace 'Determination of TC, TN and their stable isotopes'

by 'Determination of TC, TN concentrations and their stable isotope ratios'

Line123: Replace 'For the TC and TN analyses' by ' For the TC and TN concentration and isotopic ratio measurements'

Response: For a text clarification, there were changed variables description on following lines: 122, 123, 202, 205, 290, 545,

5) Vague statements should be replaced by precise explanations throughout the paper.

An example: Line382: specify the 'secondary processes'

Response: We are sorry for vague statements. We rephrased the text as below.

Statement on line 382 was based on work of Widory (2007). We changed the previous sentence to following: *“Similarly, the contradictory dependence between  $\delta^{15}\text{N}$  and TN in summer and winter was observed by Widory (2007) in PM10 samples from Paris. Widory (2007) connected this result with different primary nitrogen origin (road-traffic emissions in summer and no specific source in winter) and following secondary processes associated with isotope fractionation during degradation of atmospheric NOx leading to two distinct pathways for  $^{15}\text{N}$  enrichment (summer) and depletion (winter).”*

R: 6) Generally: swap the negative numbers in ranges. The lower numbers stay first.

Examples: Line520 -40 to -28permil and Line522 -38 to -22permil

Response: Ranges of negative numbers were swapped on original lines 338, 520, 522 and 533. Thank you for your notice.

Specific comments:

Lines54-57: Reformulate! The OC/EC ratios are very different in aerosol, depending on its sources. Moreover, make more sentences of this single one. Differentiate between equilibrium and kinetic isotopic effect. Guide the reader through that by giving some information on corresponding fractionation (non-equilibrium partitioning causes much lower fractionation than chemical reactions. Contrarily, equilibrium fractionation might be significant).

Response: We changed the Introduction chapter with the text related to isotopes in carbonaceous aerosols and we also inserted a new paragraph on isotope fractionation:

New text related to carbonaceous aerosols:

*“Total carbon in aerosol is usually divided into elemental carbon (EC) and organic carbon (OC), where OC forms the major part of TC (e.g., Mbengue et al., 2018). Although EC is more or less inert to chemical changes, slightly different  $\delta^{13}\text{C}$  in EC originating from primary emissions are described (Kawashima and Haneishi, 2012). OC represents a wide variety of organic compounds which can originate from different sources with different  $^{13}\text{C}$  content resulting in different  $\delta^{13}\text{C}$  values in bulk of emissions. Changes in isotopic ratio of  $\delta^{13}\text{C}$  in OC (and thus also TC) can subsequently affect chemical reactions where isotope fractionations via the kinetic isotope effect (KIE) usually dominate the partitioning between gas and aerosol (liquid/solid) phases (e.g. Zhang et al., 2016).”*

New paragraph related to isotope fractionation:

*“Isotopes are furthermore altered mainly by kinetic and/or equilibrium fractionation processes. Kinetic isotope effects (KIE) occur mainly during unidirectional (irreversible) reactions but also diffusion or during reversible reactions that are not yet at equilibrium (Gensch et al., 2014). Owing to KIE, reaction products (both gasses and particles) are depleted in the heavy isotope relatively to the reactants, and this effect is generally observed in organic compounds (Irei et al., 2006). If the partitioning between phases is caused by non-equilibrium processes (such as e.g. absorption), the isotopic fractionation is small and lower than that caused by chemical reactions (Rahn and Eiler, 2001). Equilibrium isotope effects occur in reversible chemical reactions or phase changes if the system is in equilibrium. Under such conditions, the heavier isotope is bound into the compounds where the total energy of the system*

*is minimized and the most stable. Equilibrium effects are typical for inorganic species and usually temperature dependent.”*

Line87: No need to introduce TC and TN. It happened already in Lines12-13

Response: Edited and only shortcuts were kept.

Line127: I don't understand. Is the oven temperature 1000 °C? How can the marble burn, if that needs 1400 °C?

Response: Theory is that burning tin should locally increase temperature around the sample to approximately 1400°C, however, this is not so important and it can be also confusing so we deleted temperature 1400°C from the MS.

Line131: What does 'parts' means? Give the approximate fraction in %.

Response: At this point, there is an auto-dilution system on the ConFlo IV interface, which is applied to each gas species matching sample and reference gas intensities. This dilution is automatic and the device dynamically reacts to the sample volume. Therefore, it is not possible to specify the exact part of the sample. For this reason, we decided to shorten the sentence to the following form:

*“~~Parts of~~ CO<sub>2</sub> and N<sub>2</sub> were then transferred into an isotope ratio mass spectrometer (IRMS; Delta V, Thermo Fisher Scientific) through a ConFlo IV interface to monitor <sup>15</sup>N/<sup>14</sup>N and <sup>13</sup>C/<sup>12</sup>C ratios.”*

Lines135-139: Mention that the final delta values are expressed relatively to the international standards and not to the 'working' standard.

Response: That's a good point. Sentence before equations was extended to following form:

*'Subsequently,  $\delta^{15}\text{N}$  of TN and  $\delta^{13}\text{C}$  of TC were calculated using the following equations and the final  $\delta$  values are expressed in relation to the international standards:'*

Line146: The loads on the quartz filter are meant here of course.

Response: Yes, you are right that the loads on quartz filters was analyzed. The sentence was changed in this sense.

Lines198-200: Move these sentences to the first paragraph, they don't belong to Fig.1.

Response: You are right, these sentences belong to Table 1 so we just changed link to Fig.1 to Tab.1 at the end of this paragraph.

Lines218-219: Reformulate: 'but they are still in line with the linear fitting of all annual data'. This is not appropriate.

Response: The sentence was reworded to the following: *“The winter Event measurements show the highest  $\delta^{13}\text{C}$  and the lowest  $\delta^{15}\text{N}$ , but a linear fit does not show a significant differences as compared to rest of the data (Fig. 2, right).”*

Lines290-291: Reformulate! Either state that the samples containing the highest  $\text{NO}_3^-$  concentration show a  $\delta^{15}\text{N}$  of..., or fit a histogram plot showing a peak of measurements with  $\text{NO}_3^-$  concentrations higher than... at a delta value of  $14\pm 1$  permil.

Response: Thank you for this comment. You are right that statement on lines 290-291 *“The  $\delta^{15}\text{N}$  shows a peak at approximately  $14\pm 1\%$ ...”* is not exact, and is the result of estimation based on exponential curves in Figure 4. So newly, we took samples with  $\text{NO}_3^-$  concentrations higher than  $6\ \mu\text{g}/\text{m}^3$  ( $n=5$ ) and we calculated an average  $\delta^{15}\text{N}$  value from these samples. It results in new value of  $\delta^{15}\text{N}$  ( $13.3\pm 0.7\%$ ), we used this calculated value instead of  $14\pm 1\%$  in whole text.

New text on lines 290-291 is following: *“Samples with the highest  $\text{NO}_3^-$  concentrations ( $>6\ \mu\text{g}/\text{m}^3$ ,  $n=5$ ) show an average  $\delta^{15}\text{N}$  of  $13.3\pm 0.7\%$ .”*

Lines300-307: The paragraph should be moved upward to Fig. 3.

Response: The paragraph on lines 300-307 relates to the previous one, where the results in Figure 4 are commented. For this reason, we would like keep this paragraph in the current position.

Lines338-349: Completely rearrange! Suggestion: start with a statement ‘The measured TC  $\delta^{13}\text{C}$  ranged between.... These values are ... (in which part?) situated in the reported ranges... (here give an overall range. for that take the information from e.g. the review by Gensch et al. 2014). This broad range can be explained by... (plants, marine, combustion sources... whatever). (At this point bring the similarity to other european reported values).’

Response: Thank you for this suggestion. Based on this, paragraph was rearranged as below:

*“The  $\delta^{13}\text{C}$  of TC ranged from  $-28.9$  to  $-25.4\%$  (Fig. 6) and the lowest  $\delta^{13}\text{C}$  we observed in field blank samples (mean  $-29.2\%$ ,  $n=7$ ), indicating that the lowest summer values in particulate matter were close to gas phase values. Our  $\delta^{13}\text{C}$  values are within the range reported for particulate TC ( $-29\%$  to  $-15\%$ ) as summarized by Gensch et al. (2014). The lowest values are associated with fine particles after combustion and transport (Ancelet et al., 2011; Widory, 2006) while the highest values are associated with the coarse fraction and carbonate contribution (Kawamura et al., 2004). This broad range can be explained by the influence of marine aerosols (Ceburnis et al., 2016), different anthropogenic sources (e.g., Widory et al., 2004), as well as different distributions of C3 and C4 plants (Martinelli et al., 2002) resulting in different  $\delta^{13}\text{C}$  values in the northern and southern hemispheres (Cachier, 1989). The  $\delta^{13}\text{C}$  values at the Košetice site fall within the range common to other European sites. For example, a rural background site in Vavihill (southern Sweden, range  $-26.7$  to  $-25.6\%$ , Martinsson et al. (2017)), urban Wroclaw (Poland, range  $-27.6$  to  $-25.3\%$ , Górká et al. (2014)), different sites (urban, coastal, forest) in Lithuania (East Europe, Masalaite et al., 2015, 2017), as well as urban Zurich (Switzerland, Fisseha et al. (2009)).”*

Line349: Replace 'The d13C values are significantly smaller than those of d15N due to' by 'The range of TC d13C values is significantly smaller than that of TN d15N due to'

*Response: The sentence was changed based on the comment as bellow: "The range of TC  $\delta^{13}C$  values is significantly narrower than that of TN  $\delta^{15}N$  due to..."*

Lines358-359: This comparison is confusing: what do you mean? Similar to what? Do you refer the first or the second sentence?

*Response: The comparison was between first and third sentence. Second sentence was moved to first paragraph of section 3.2, so now it should be clearer. See first paragraph of subsection 3.2 in the revised MS.*

Lines365-370: Change the order of these two sentences. Describe first the observations and then give the explanation.

*Response: The order of sentences was changed. See end paragraph of subsection 3.2 in the revised MS.*

Line 375: Replace 'these isotopes' with 'isotope distributions'.

*Response: Replaced*

Lines379-380: Not the changes in aerosol chemistry are different, but the chemistry itself.

*Response: Word "changes" was deleted.*

Lines386-391: Change the order of the first two sentences. The third one describes the first not the second one.

*Response: The order of sentences was changed.*

Lines415-422: Lack of clarity! Reformulate, by bringing some structure in it: starting at high  $NH_4/SO_4$  down to 2 and lower than 2! For each range: particle components, processes (e.g.  $NH_3$  deficit in gas phase at ratios <2), seasonal dependence.

*Response: Thank you for your suggestion. Based on this comment, we decided to completely change this paragraph to the following:*

*"Figure 8 shows an enrichment of  $^{15}N$  as a function of the molar ratio of  $NH_4^+/SO_4^{2-}$ . The highest  $NH_4^+/SO_4^{2-}$  ratios, showing an ammonia rich atmosphere, were observed during winter, late autumn and early spring along with high abundance of  $NO_3^-$  that is related to favorable thermodynamic conditions during heating season and enough ammonia in the atmosphere. Gradual decreasing molar ratios of  $NH_4^+/SO_4^{2-}$  during spring indicate a gradual increase of ambient temperatures and therefore worsened thermodynamic conditions for  $NO_3^-$  formation in aerosol phase, which was accompanied by*

a visible decrease in the nitrate content in aerosols (Fig. 8). The increase of temperatures finally leads to the  $\text{NH}_4^+/\text{SO}_4^{2-}$  ratio reaching 2 at the turn of spring and summer. Finally, summer values of  $\text{NH}_4^+/\text{SO}_4^{2-}$  molar ratio below 2 indicate that  $\text{SO}_4^{2-}$  in aerosol particles at high summer temperatures may not be completely saturated with ammonium but it can be composed from mixture of  $(\text{NH}_4)_2\text{SO}_4$  and  $\text{NH}_4\text{HSO}_4$  (Weber et al., 2016). The equilibrium reaction between these two forms of ammonium sulfates related to temperature oscillation during a day and due to vertical mixing of the atmosphere is a probable factor which leads to increased values of  $\delta^{15}\text{N}$  in early summer. Ammonia measurements, that were carried out at the Košetice site until 2001, showed that  $\text{NH}_3$  concentrations in summer were slightly higher than in winter ([http://portal.chmi.cz/files/portal/docs/uoco/isko/tab\\_roc/2000\\_enh/CZE/kap\\_18/kap\\_18\\_026.html](http://portal.chmi.cz/files/portal/docs/uoco/isko/tab_roc/2000_enh/CZE/kap_18/kap_18_026.html)), which supports temperature as a main factor influencing  $\text{NH}_4^+/\text{SO}_4^{2-}$  ratio at Košetice. In this context, we noticed that 25 out of 33 summer samples have molar ratios of  $\text{NH}_4^+/\text{SO}_4^{2-}$  below 2, and the remaining samples are approximately 2, and the relative abundance of  $\text{NO}_3^-$  in PM1 in those samples is very low (ca. 1.7 %)."

Lines429-434: Too abrupt! Start with the observation of similar gaseous  $\text{NH}_3$  in summer and winter. Describe what a thermodynamic equilibrium would mean for the particles and how would this be reflected in the delta values. Measurements show a different situation -> more organics in summer...

Response: Thank you for this notice. We moved the sentence, about similar gaseous  $\text{NH}_3$  concentrations in summer and winter at the Košetice site, to paragraph above (see response to previous comment). The lines have been reformulated into the following form:

*„ In thermodynamic equilibrium, partitioning between gas ( $\text{NH}_3$ ) and aerosol ( $\text{NH}_4^+$ ) phases should result in even larger  $\delta^{15}\text{N}$  values of particles in summer, however, measurements show a different situation. Summer  $\delta^{15}\text{N}$  values are highest but further enrichment was stopped. Moreover, we observed a positive (and significant) correlation between temperature and  $\delta^{13}\text{C}$  ( $r=0.39$ ) only in summer, whereas the correlation coefficient of  $\delta^{15}\text{N}$  vs. temperature is statistically insignificant, suggesting that while values of  $\delta^{15}\text{N}$  reached their maxima, the  $\delta^{13}\text{C}$  can still grow with even higher temperatures due to the influence of organics in summer season.“*

Lines482-484: Very confuse sentence. Reformulate!

Response: The sentence is reworded to the following: *“During the Event,  $\delta^{15}\text{N}$  correlates positively with  $\text{NO}_3^-$  ( $r=0.96$ ) and  $\text{NO}_3^-/\text{TN}$  (0.98). Before the Event, we also observed the highest values of  $\delta^{15}\text{N}$  at approximately 13.3‰, which we previously interpreted by the emissions from domestic heating via coal and/or biomass burning.“*

Lines570-574: The winter observation should stay before the summer ones. In that way, the flow is more coherent (e.g. no need to explain lower values of TN  $\delta^{15}\text{N}$  when there are high fraction of nitrates.).

Response: In summary and conclusions, we wanted to discuss all seasons for the first time. After summary related to seasonal data follow conclusions related to winter Event. This is reason why the winter data are discussed after summer data. It seems more logic to us if the winter Event summary

follows winter data than to discuss first about winter, then continue about summer season, and after that return to discuss about the winter Event. So we prefer not to move this paragraph.

Editorial revisions:

The used English is not optimal. I do not give any editorial advises! My only suggestion is that this manuscript MUST be carefully revised by a native speaker. The work is too good to risk to make the reader hostile due to the language.

Response: We are sorry for inconvenience with English. In fact, the text was checked by the professional language service before the first submission so we expected it should be alright. As the final step after this review process, we sent again the manuscript for English corrections to Sean Mark Miller who is a native speaker and professional corrector.

The manuscript is 'peppered' with:

#### 1) Wrong prepositions

- Lines43-44 'Key processes in the atmosphere, which are involved WITH climate changes, air quality, rain events (Fuzzi et al., 2015) or visibility (Hyslop, 2009), are strongly influenced by aerosols.' –

Lines391-392 ' Although Savard et al. (2017) reported a similar negative  $\delta^{15}\text{N}$  in  $\text{NH}_4^+$  dependence AT temperatures in Alberta (Canada),...' Also the word order is wrong.

Response: Text with above mentioned prepositions was changed.

Lines43-44: *"Aerosols have a strong impact on key processes in the atmosphere associated with climate change..."*

Lines391-392: *"Although Savard et al. (2017) reported a similar negative temperature dependence for  $\delta^{15}\text{N}$  in  $\text{NH}_4^+$  in Alberta (Canada), ..."*

#### 2) Unhandy expressions

- Lines325-328:' During the domestic heating season with the highest concentrations of  $\text{NO}_3$  and  $\text{NH}_4^+$ , we can observe a significant increase in OrgN with  $\delta^{15}\text{N}$  again at approximately 14‰ which implies that the isotopic composition of OrgN is determined by the same process during maximal  $\text{NO}_3$ -concentrations, that is, emissions from domestic heating.'

Response: Sentence on lines325-328 was shortened to: *"During the domestic heating season with the highest concentrations of  $\text{NO}_3^-$  and  $\text{NH}_4^+$ , we can observe a significant increase in OrgN with  $\delta^{15}\text{N}$  again at approximately 13.3‰, which implies that the isotopic composition of OrgN is determined by the same source."*

#### 3) Long, confusing sentences

Lines361-365 or Lines391-396. In these cases it helps to divide into more clear sentences.

Response: We divided above mentioned long sentences and also others in the revised MS.



Newly for line 361-365: “Similarly, at the Košetice station, different carbonaceous aerosols were observed during the heating season (Oct.–Apr.) than in summer (Mbengue et al., 2018; Vodička et al., 2015). Moreover, winter aerosols at the Košetice site were probably affected by not only biomass burning but also coal burning (Schwarz et al., 2016), which can result in higher carbon contents and more  $^{13}\text{C}$  enriched particles (Widory, 2006).”

Newly for lines 391-396: “Although Savard et al. (2017) reported a similar negative temperature dependence for  $\delta^{15}\text{N}$  of  $\text{NH}_4^+$  in Alberta (Canada), most studies reported a positive temperature dependence for  $\delta^{15}\text{N}$  of  $\text{NH}_4^+$  that is stronger than that for  $\delta^{15}\text{N}$  of  $\text{NO}_3^-$  (e.g., Kawashima and Kurahashi, 2011; Kundu et al., 2010). The reason is that  $\text{NH}_3$  gas concentrations are higher during warmer conditions, and thus the isotopic equilibrium exchange reaction, i.e.,  $\text{NH}_3(\text{g}) \leftrightarrow \text{NH}_4^+(\text{p})$ , which leads to  $^{15}\text{N}$  enrichment in particles, is more intensive.”

#### References:

- Ancelet, T., Davy, P.K., Trompetter, W.J., Markwitz, A., Weatherburn, D.C., 2011. Carbonaceous aerosols in an urban tunnel. *Atmos. Environ.* 45, 4463–4469. doi:10.1016/j.atmosenv.2011.05.032
- Bikkina, S., Kawamura, K., Sarin, M., 2016. Stable carbon and nitrogen isotopic composition of fine mode aerosols (PM<sub>2.5</sub>) over the Bay of Bengal: impact of continental sources. *Tellus B Chem. Phys. Meteorol.* 68, 31518. doi:10.3402/tellusb.v68.31518
- Boreddy, S.K.R., Parvin, F., Kawamura, K., Zhu, C., Lee, C. Te, 2018. Stable carbon and nitrogen isotopic compositions of fine aerosols (PM<sub>2.5</sub>) during an intensive biomass burning over Southeast Asia: Influence of SOA and aging. *Atmos. Environ.* 191, 478–489. doi:10.1016/j.atmosenv.2018.08.034
- Cachier, H., 1989. Isotopic characterization of carbonaceous aerosols. *Aerosol Sci. Technol.* 10, 379–385. doi:10.1080/02786828908959276
- Ceburnis, D., Masalaite, A., Ovadnevaite, J., Garbaras, A., Remeikis, V., Maenhaut, W., Claeys, M., Sciare, J., Baisnée, D., O’Dowd, C.D., 2016. Stable isotopes measurements reveal dual carbon pools contributing to organic matter enrichment in marine aerosol. *Sci. Rep.* 6, 1–6. doi:10.1038/srep36675
- Fisseha, R., Saurer, M., Jäggi, M., Siegwolf, R.T.W., Dommen, J., Szidat, S., Samburova, V., Baltensperger, U., 2009. Determination of primary and secondary sources of organic acids and carbonaceous aerosols using stable carbon isotopes. *Atmos. Environ.* 43, 431–437. doi:10.1016/j.atmosenv.2008.08.041
- Gensch, I., Kiendler-Scharr, A., Rudolph, J., 2014. Isotope ratio studies of atmospheric organic compounds: Principles, methods, applications and potential. *Int. J. Mass Spectrom.* 365–366, 206–221. doi:10.1016/j.ijms.2014.02.004
- Górka, M., Rybicki, M., Simoneit, B.R.T., Marynowski, L., 2014. Determination of multiple organic matter sources in aerosol PM<sub>10</sub> from Wrocław, Poland using molecular and stable carbon isotope compositions. *Atmos. Environ.* 89, 739–748. doi:10.1016/j.atmosenv.2014.02.064
- Irei, S., Huang, L., Collin, F., Zhang, W., Hastie, D., Rudolph, J., 2006. Flow reactor studies of the stable carbon isotope composition of secondary particulate organic matter generated by OH-radical-induced reactions of toluene. *Atmos. Environ.* 40, 5858–5867. doi:10.1016/j.atmosenv.2006.05.001
- Kawamura, K., Kobayashi, M., Tsubonuma, N., Mochida, M., Watanabe, T., Lee, M., 2004. Organic and

- inorganic compositions of marine aerosols from East Asia: Seasonal variations of water-soluble dicarboxylic acids, major ions, total carbon and nitrogen, and stable C and N isotopic composition. *Geochemical Soc. Spec. Publ.* 9, 243–265. doi:10.1016/S1873-9881(04)80019-1
- Kawashima, H., Haneishi, Y., 2012. Effects of combustion emissions from the Eurasian continent in winter on seasonal  $\delta^{13}\text{C}$  of elemental carbon in aerosols in Japan. *Atmos. Environ.* 46, 568–579. doi:10.1016/j.atmosenv.2011.05.015
- Kawashima, H., Kurahashi, T., 2011. Inorganic ion and nitrogen isotopic compositions of atmospheric aerosols at Yurihonjo, Japan: Implications for nitrogen sources. *Atmos. Environ.* 45, 6309–6316. doi:10.1016/j.atmosenv.2011.08.057
- Kundu, S., Kawamura, K., Lee, M., 2010. Seasonal variation of the concentrations of nitrogenous species and their nitrogen isotopic ratios in aerosols at Gosan, Jeju Island: Implications for atmospheric processing and source changes of aerosols. *J. Geophys. Res. Atmos.* 115, 1–19. doi:10.1029/2009JD013323
- Kunwar, B., Kawamura, K., Zhu, C., 2016. Stable carbon and nitrogen isotopic compositions of ambient aerosols collected from Okinawa Island in the western North Pacific Rim, an outflow region of Asian dusts and pollutants. *Atmos. Environ.* 131, 243–253. doi:10.1016/j.atmosenv.2016.01.035
- Martinelli, L.A., Camargo, P.B., Lara, L.B.L.S., Victoria, R.L., Artaxo, P., 2002. Stable carbon and nitrogen isotopic composition of bulk aerosol particles in a C4 plant landscape of southeast Brazil. *Atmos. Environ.* 36, 2427–2432. doi:10.1016/S1352-2310(01)00454-X
- Martinsson, J., Andersson, A., Sporre, M.K., Friberg, J., Kristensson, A., Swietlicki, E., Olsson, P.A., Stenström, K.E., 2017. Evaluation of  $\delta^{13}\text{C}$  in carbonaceous aerosol source apportionment at a rural measurement site. *Aerosol Air Qual. Res.* 17, 2081–2094. doi:10.4209/aaqr.2016.09.0392
- Masalaite, A., Holzinger, R., Remeikis, V., Röckmann, T., Dusek, U., 2017. Characteristics, sources and evolution of fine aerosol (PM<sub>1</sub>) at urban, coastal and forest background sites in Lithuania. *Atmos. Environ.* 148, 62–76. doi:10.1016/j.atmosenv.2016.10.038
- Masalaite, A., Remeikis, V., Garbaras, A., Dudoitis, V., Ulevicius, V., Ceburnis, D., 2015. Elucidating carbonaceous aerosol sources by the stable carbon  $\delta^{13}\text{C}_{\text{TC}}$  ratio in size-segregated particles. *Atmos. Res.* 158–159, 1–12. doi:10.1016/j.atmosres.2015.01.014
- Mbengue, S., Fusek, M., Schwarz, J., Vodička, P., Šmejkalová, A.H., Holoubek, I., 2018. Four years of highly time resolved measurements of elemental and organic carbon at a rural background site in Central Europe. *Atmos. Environ.* 182, 335–346. doi:10.1016/j.atmosenv.2018.03.056
- Meier-Augenstein, W., Kemp, H.F., 2012. Stable Isotope Analysis: General Principles and Limitations, in: *Wiley Encyclopedia of Forensic Science*. American Cancer Society. doi:10.1002/9780470061589.fsa1041
- Miyazaki, Y., Kawamura, K., Jung, J., Furutani, H., Uematsu, M., 2011. Latitudinal distributions of organic nitrogen and organic carbon in marine aerosols over the western North Pacific. *Atmos. Chem. Phys.* 11, 3037–3049. doi:10.5194/acp-11-3037-2011
- Mkoma, S., Kawamura, K., Tachibana, E., Fu, P., 2014. Stable carbon and nitrogen isotopic compositions of tropical atmospheric aerosols: sources and contribution from burning of C3 and C4 plants to organic aerosols. *Tellus B* 66, 20176. doi:10.3402/tellusb.v66.20176
- Morera-Gómez, Y., Santamaría, J.M., Elustondo, D., Alonso-Hernández, C.M., Widory, D., 2018. Carbon and nitrogen isotopes unravels sources of aerosol contamination at Caribbean rural and urban coastal sites. *Sci. Total Environ.* 642, 723–732. doi:10.1016/j.scitotenv.2018.06.106

- Rahn, T., Eiler, J.M., 2001. Experimental constraints on the fractionation of C-13/C-12 and O-18/O-16 ratios due to adsorption of CO<sub>2</sub> on mineral substrates at conditions relevant to the surface of Mars. *Geochim. Cosmochim. Acta* 65, 839–846.
- Savard, M.M., Cole, A., Smirnoff, A., Vet, R., 2017.  $\delta^{15}\text{N}$  values of atmospheric N species simultaneously collected using sector-based samplers distant from sources – Isotopic inheritance and fractionation. *Atmos. Environ.* 162, 11–22. doi:10.1016/j.atmosenv.2017.05.010
- Schwarz, J., Cusack, M., Karban, J., Chalupníčková, E., Havránek, V., Smolík, J., Ždímal, V., 2016. PM<sub>2.5</sub> chemical composition at a rural background site in Central Europe, including correlation and air mass back trajectory analysis. *Atmos. Res.* 176–177, 108–120. doi:10.1016/j.atmosres.2016.02.017
- Vodička, P., Schwarz, J., Cusack, M., Ždímal, V., 2015. Detailed comparison of OC/EC aerosol at an urban and a rural Czech background site during summer and winter. *Sci. Total Environ.* 518–519, 424–433. doi:10.1016/j.scitotenv.2015.03.029
- Weber, R.J., Guo, H., Russell, A.G., Nenes, A., 2016. High aerosol acidity despite declining atmospheric sulfate concentrations over the past 15 years. *Nat. Geosci.* 9, 282–285. doi:10.1038/ngeo2665
- Widory, D., 2007. Nitrogen isotopes: Tracers of origin and processes affecting PM<sub>10</sub> in the atmosphere of Paris. *Atmos. Environ.* 41, 2382–2390. doi:10.1016/j.atmosenv.2006.11.009
- Widory, D., 2006. Combustibles, fuels and their combustion products: A view through carbon isotopes. *Combust. Theory Model.* 10, 831–841. doi:10.1080/13647830600720264
- Widory, D., Roy, S., Le Moullec, Y., Goupil, G., Cocherie, A., Guerrot, C., 2004. The origin of atmospheric particles in Paris: A view through carbon and lead isotopes. *Atmos. Environ.* 38, 953–961. doi:10.1016/j.atmosenv.2003.11.001
- Xiao, H.-W., Xiao, H.-Y., Luo, L., Zhang, Z.-Y., Huang, Q.-W., Sun, Q.-B., Zeng, Z., 2018. Stable carbon and nitrogen isotope compositions of bulk aerosol samples over the South China Sea. *Atmos. Environ.* 193, 1–10. doi:https://doi.org/10.1016/j.atmosenv.2018.09.006
- Xue, D., Botte, J., Baets, B. De, Accoe, F., Nestler, A., Taylor, P., Cleemput, O. Van, Berglund, M., Boeckx, P., 2009. Present limitations and future prospects of stable isotope methods for nitrate source identification in surface- and groundwater. *Water Res.* 43, 1159–1170. doi:https://doi.org/10.1016/j.watres.2008.12.048
- Zhang, Y.L., Kawamura, K., Cao, F., Lee, M., 2016. Stable carbon isotopic compositions of low-molecular-weight dicarboxylic acids, oxocarboxylic acids, ??-dicarbonyls, and fatty acids: Implications for atmospheric processing of organic aerosols. *J. Geophys. Res. Atmos.* 121, 3707–3717. doi:10.1002/2015JD024081

# Seasonal study of stable carbon and nitrogen isotopic composition in fine aerosols at a Central European rural background station

Petr Vodička<sup>1,2</sup>, Kimitaka Kawamura<sup>1</sup>, Jaroslav Schwarz<sup>2</sup>, Bhagawati Kunwar<sup>1</sup>, Vladimír Ždímal<sup>2</sup>

<sup>1</sup> Chubu Institute for Advanced Studies, Chubu University, 1200 Matsumoto-cho, Kasugai 487-8501, Japan

<sup>2</sup> Institute of Chemical Process Fundamentals of the Czech Academy of Science, Rozvojová 2/135, 165 02, Prague 6, Czech Republic

Correspondence to: vodicka@icpf.cas.cz (P. Vodička), kkawamura@isc.chubu.ac.jp (K. Kawamura)

**Abstract.** A study of the stable carbon isotope ratios ( $\delta^{13}\text{C}$ ) of total carbon (TC) and the nitrogen isotope ratios ( $\delta^{15}\text{N}$ ) of total nitrogen (TN) were carried out for fine aerosol particles (PM1) collected every two days with a 24 h sampling period at a rural background site in Košetice (Central Europe) from September 27, 2013, to August 9, 2014 (n=146). We found a seasonal pattern for both  $\delta^{13}\text{C}$  and  $\delta^{15}\text{N}$ . The seasonal variation in  $\delta^{15}\text{N}$  was characterized by lower values (av.  $13.1 \pm 4.5\text{‰}$ ) in winter and higher values ( $25.0 \pm 1.6\text{‰}$ ) in summer. Autumn and spring were transition periods when the isotopic composition gradually changed due to the changing sources and the ambient temperature. The seasonal variation in  $\delta^{13}\text{C}$  was less pronounced but more depleted in  $^{13}\text{C}$  in summer ( $-27.8 \pm 0.4\text{‰}$ ) as compared to winter ( $-26.7 \pm 0.5\text{‰}$ ).

A comparative analysis with water-soluble ions, organic carbon, elemental carbon, trace gases and meteorological parameters (mainly ambient temperature) has shown major associations with the isotopic compositions, which enlightened the affecting processes. A comparison of  $\delta^{15}\text{N}$  with  $\text{NO}_3^-$ ,  $\text{NH}_4^+$  and organic nitrogen (OrgN) revealed that although a higher content of  $\text{NO}_3^-$  was associated with a decrease in the  $\delta^{15}\text{N}$  of TN,  $\text{NH}_4^+$  and OrgN caused increases. The highest concentrations of nitrate, mainly represented by  $\text{NH}_4\text{NO}_3$ , related to the emissions from biomass burning, leading to an average  $\delta^{15}\text{N}$  of TN (13.3‰) in winter. During spring, the percentage of  $\text{NO}_3^-$  in PM1 decreased. An enrichment of  $^{15}\text{N}$  was probably driven by the equilibrium exchange between the gas and aerosol phases ( $\text{NH}_3(\text{g}) \leftrightarrow \text{NH}_4^+(\text{p})$ ), which is supported by the increased ambient temperature. This equilibrium was suppressed in early summer when the molar ratios of  $\text{NH}_4^+/\text{SO}_4^{2-}$  reached 2, and the nitrate partitioning in aerosol was negligible due to the increased ambient temperature. Summertime  $\delta^{15}\text{N}$  values were among the highest, suggesting the aging of ammonium sulfate and OrgN aerosols. Such aged aerosols can be coated by organics in which  $^{13}\text{C}$  enrichment takes place by the photooxidation process. This result was supported by a positive correlation of  $\delta^{13}\text{C}$  with ambient temperature and ozone, as observed in the summer season.

Deleted: Determinations

Deleted: on

Deleted: daily basis

Deleted: between 27

Deleted: and 9

Deleted: more pronounced, with  $^{15}\text{N}$ -depleted

Deleted:  $^{15}\text{N}$ -enriched

Deleted: are

Deleted: different

Deleted: Major controls of the seasonal dependencies were found based on a

Deleted: ).

Deleted: values in

Deleted: had the opposite influences.

Deleted: originated from

Deleted: lower

Deleted: values of approximately 14‰

Deleted: , and  $^{15}\text{N}$

Deleted: )) as

Deleted:  $\text{NH}_4^+/\text{SO}_4^{2-}$

Deleted: . During summer, kinetic reactions probably were the primary processes as opposed

Deleted: gas-aerosol equilibrium on a nitrogen level. However, summertime

Deleted: some of

Deleted: observed, probably

Deleted: the

63 During winter, we observed an event with the lowest  $\delta^{15}\text{N}$  and highest  $\delta^{13}\text{C}$  values. The winter *Event*  
64 occurred in prevailing southeast air masses. Although the higher  $\delta^{13}\text{C}$  values probably originated from  
65 biomass burning particles, the lowest  $\delta^{15}\text{N}$  values were probably associated with agriculture emissions  
66 of  $\text{NH}_3$  under low temperature conditions ( $\leq 0^\circ\text{C}$ ).  
67

Deleted: was connected with

Deleted: winds

Deleted: that were below

Deleted: .

## 68 1. Introduction

69  
70 Aerosols have a strong impact on key processes in the atmosphere associated with climate change, air  
71 quality, rain patterns and visibility (Fuzzi et al., 2015; Hyslop, 2009). Because these processes are still  
72 insufficiently understood, they are studied intensively. One approach to explore chemical processes  
73 taking place in atmospheric aerosols is the application of stable carbon ( $\delta^{13}\text{C}$ ) and nitrogen ( $\delta^{15}\text{N}$ )  
74 isotope ratios. These isotopes can provide unique insight on source emissions along with physical and  
75 chemical processes in the atmosphere (Gensch et al., 2014; Kawamura et al., 2004), as well as  
76 atmospheric composition in history (Dean et al., 2014). However, studies based on single isotope  
77 analysis have their limitations (Meier-Augenstein and Kemp, 2012). Those include an uncertainty when  
78 multiple sources or different processes are present, whose measured delta values may overlap (typically  
79 in the narrower  $\delta^{13}\text{C}$  range). Another factor are isotope fractionation processes which may constrain the  
80 accuracy of source identification (Xue et al., 2009). Using isotope analysis on multiple phases (gas and  
81 particulate matter) or multiple isotope analysis can overcome these problems and may be useful to  
82 constrain the potential sources/processes.

Deleted: Key

Deleted: , which are involved

Deleted: changes

Deleted: events

Deleted: (Fuzzi et al., 2015) or visibility (Hyslop, 2009), are strongly influenced by aerosols.

Deleted: information

Deleted: together

83 Generally, isotopic composition is affected by both primary emissions (e.g., Heaton, 1990; Widory,  
84 2006) and secondary processes (e.g., Fisseha et al., 2009b; Walters et al., 2015a). Isotopes are  
85 furthermore altered mainly by kinetic and/or equilibrium fractionation processes. Kinetic isotope effects  
86 (KIE) occur mainly during unidirectional (irreversible) reactions but also diffusion or during reversible  
87 reactions that are not yet at equilibrium (Gensch et al., 2014). Owing to KIE, reaction products (both  
88 gasses and particles) are depleted in the heavy isotope relatively to the reactants, and this effect is  
89 generally observed in organic compounds (Irei et al., 2006). If the partitioning between phases is caused  
90 by non-equilibrium processes (such as e.g. absorption), the isotopic fractionation is small and lower  
91 than that caused by chemical reactions (Rahn and Eiler, 2001). Equilibrium isotope effects occur in  
92 reversible chemical reactions or phase changes if the system is in equilibrium. Under such conditions,  
93 the heavier isotope is bound into the compounds where the total energy of the system is minimized and  
94 the most stable. Equilibrium effects are typical for inorganic species and usually temperature dependent.  
95 Regarding to the isotopic distribution in individual phases,  $^{15}\text{N}$  is generally depleted in gas phase  
96 precursors (ammonia, nitrogen oxides) but is more enriched in ions ( $\text{NH}_4^+$ ,  $\text{NO}_3^-$ ) in rainfall and the  
97 most enriched in particulate matter and dry deposition (Heaton et al., 1997; Ti et al., 2018). Total

Deleted: Isotopic

Deleted: Both  $\delta^{13}\text{C}$  and  $\delta^{15}\text{N}$  values are influenced by kinetic and equilibrium isotope fractionation that takes place in the atmosphere. In the case of nitrogen,  $^{15}\text{N}$  is generally depleted in gas phase precursors (ammonia, nitrogen oxides) but is more enriched in ions ( $\text{NH}_4^+$ ,  $\text{NO}_3^-$ ) in rainfall and most enriched in particulate matter and dry deposition (Heaton et al., 1997). In the case of carbon, the major form is organic carbon (OC), which is composed of large numbers of organic compounds where isotope fractionations via the kinetic isotope effect (KIE) usually dominating the partitioning between gas and aerosol (liquid/solid) phases

122 nitrogen usually consists of the three main components,  $\text{NO}_3^-$ ,  $\text{NH}_4^+$  and/or organic nitrogen (OrgN),  
123 and thus, the final  $\delta^{15}\text{N}$  value in TN can be formulated by the following equation:

124 
$$\delta^{15}\text{N}_{\text{TN}} = \delta^{15}\text{N}_{\text{NO}_3^-} \cdot f_{\text{NO}_3^-} + \delta^{15}\text{N}_{\text{NH}_4^+} \cdot f_{\text{NH}_4^+} + \delta^{15}\text{N}_{\text{OrgN}} \cdot f_{\text{OrgN}}$$

125 where  $f_{\text{NO}_3^-} + f_{\text{NH}_4^+} + f_{\text{OrgN}} = 1$  and  $f$  represents the fractions of nitrogen from  $\text{NO}_3^-$ ,  $\text{NH}_4^+$  and OrgN in  
126 TN, respectively.

127 Total carbon in aerosol is usually divided into elemental carbon (EC) and organic carbon (OC), where  
128 OC forms the major part of TC (e.g., Mbengue et al., 2018). Although EC is more or less inert to  
129 chemical changes, slightly different  $\delta^{13}\text{C}$  in EC originating from primary emissions are described  
130 (Kawashima and Haneishi, 2012). OC represents a wide variety of organic compounds which can  
131 originate from different sources with different  $^{13}\text{C}$  content resulting in different  $\delta^{13}\text{C}$  values in bulk of  
132 emissions. Changes in isotopic ratio of  $\delta^{13}\text{C}$  in OC (and thus also TC) can subsequently affect chemical  
133 reactions where isotope fractionations via the kinetic isotope effect (KIE) usually dominate the  
134 partitioning between gas and aerosol (liquid/solid) phases (e.g. Zhang et al., 2016).

135  
136 Many studies have been conducted on  $\delta^{13}\text{C}$  and  $\delta^{15}\text{N}$  in particulate matter (PM) in Asia (e.g., Kundu et  
137 al., 2010; Pavuluri et al., 2015b; Pavuluri and Kawamura, 2017) and ~~the Americas~~ (e.g., Martinelli et  
138 al., 2002; Savard et al., 2017). ~~Recently, the multiple isotope approach was applied in several studies~~  
139 ~~by using  $\delta^{13}\text{C}$  and  $\delta^{15}\text{N}$  measurements. Specifically, the  $\delta^{13}\text{C}$  and  $\delta^{15}\text{N}$  composition of aerosol (along~~  
140 ~~with other supporting data) was used to identify the sources and processes on marine sites in Asia~~  
141 ~~(Bikkina et al., 2016; Kunwar et al., 2016; Miyazaki et al., 2011; Xiao et al., 2018). Same isotopes were~~  
142 ~~used to determine the contribution of biomass burning to organic aerosols in India (Boreddy et al., 2018)~~  
143 ~~and in Tanzania (Mkoma et al., 2014), or to unravel the sources of aerosol contamination at Cuban rural~~  
144 ~~and urban coastal sites (Morera-Gómez et al., 2018). These studies show the potential advantages of~~  
145  ~~$\delta^{13}\text{C}$  and  $\delta^{15}\text{N}$  isotope ratios to characterize aerosol types and to reveal the underlying chemical~~  
146 ~~processes that take place in them.~~

147 ~~Only few studies on  $\delta^{13}\text{C}$  and  $\delta^{15}\text{N}$  isotope ratios have been performed in Europe, which are moreover~~  
148 ~~often based on single isotope analysis. Regarding the isotopes of nitrogen, Widory (2007) published a~~  
149 ~~broad study on  $\delta^{15}\text{N}$  in TN in PM10 samples from Paris, focusing on seasonality (winter vs. summer)~~  
150 ~~with some specific sources. Freyer (1991) reported the seasonal variation in the  $\delta^{15}\text{N}$  of nitrate in~~  
151 ~~aerosols and rainwater as well as gaseous  $\text{HNO}_3$  at a moderately polluted urban area in Jülich (Germany).~~  
152 ~~Yeatman et al. (2001a, 2001b) conducted analyses of  $\delta^{15}\text{N}$  in  $\text{NO}_3^-$  and  $\text{NH}_4^+$  at two coastal sites from~~  
153 ~~Weybourne, England, and Mace Head, Ireland, focusing on the effects of the possible sources and~~  
154 ~~aerosol size segregation on their formation processes and isotopic enrichment. More recently, Cieżka~~  
155 ~~et al. (2016) reported one-year observations of  $\delta^{15}\text{N}$  in  $\text{NH}_4^+$  and ions in precipitation at an urban site~~  
156 ~~in Wroclaw, Poland, whereas Beyn et al. (2015) reported seasonal changes in  $\delta^{15}\text{N}$  in  $\text{NO}_3^-$  in wet and~~  
157 ~~dry deposition at a coastal and an urban site in Germany to evaluate the nitrogen pollution levels.~~

Moved (insertion) [1]

Deleted: America

Deleted: However, only

Deleted: . European

Deleted: studies on aerosols mainly involve the

Deleted:  $\delta^{15}\text{N}$  in  $\text{NO}_3^-$  and/or  $\text{NH}_4^+$ .

Deleted: seasons

164 Studies on  $\delta^{13}\text{C}$  at European sites have been focused more on urban aerosols. Fisseha et al. (2009) used  
165 stable carbon isotopes of the different carbonaceous aerosol fractions (TC, black carbon, and water  
166 soluble and insoluble OC) to determine the sources of urban aerosols in Zurich, Switzerland, during  
167 winter and summer. Similarly, Widory et al. (2004) used  $\delta^{13}\text{C}$  of TC, along with an analysis of lead  
168 isotopes, to study the origin of aerosol particles in Paris (France). Górká et al. (2014) used  $\delta^{13}\text{C}$  in TC  
169 in conjunction with PAH analyses for the determination of the sources of PM10 organic matter in  
170 Wrocław, Poland, during vegetative and heating seasons. Masalaite et al. (2015) used an analysis of  
171  $\delta^{13}\text{C}$  in TC on size-segregated urban aerosols to elucidate carbonaceous PM sources in Vilnius,  
172 Lithuania. Fewer studies have been conducted on  $\delta^{13}\text{C}$  in aerosols in rural and remote areas of Europe.  
173 In the 1990s, Pichlmayer et al. (1998) conducted a multiple isotope analysis of  $\delta^{13}\text{C}$  in OC,  $\delta^{15}\text{N}$  in  $\text{NO}_3^-$   
174 and  $\delta^{34}\text{S}$  in  $\text{SO}_4^{2-}$  in snow and air samples for the characterization of pollutants at high-alpine sites in  
175 Central Europe. Recently, Martinsson et al. (2017) published seasonal observations of  $\delta^{13}\text{C}$  in TC, along  
176 with the  $^{14}\text{C}/^{12}\text{C}$  isotope ratio of PM10 at a rural background station in Vavíhill in southern Sweden  
177 based on 25 weekly samples.

178 To broaden the multiple isotope approach over the European continent, we present seasonal variations  
179 in  $\delta^{13}\text{C}$  of TC and  $\delta^{15}\text{N}$  of TN in the PM1 fraction of atmospheric aerosols at a rural background site in  
180 Central Europe. To the best of our knowledge, this is the first seasonal study of these isotopes in this  
181 region, and it is one of the most comprehensive isotope studies of a fine fraction of aerosols.

## 183 2. Materials and methods

### 184 2.1. Measurement site

185  
186 The Košetice observatory is a key station of the Czech Hydrometeorological Institute (CHMI), focusing  
187 on air quality and environmental monitoring (Váňa and Dvorská, 2014). The site is located in the Czech  
188 Highlands (49°34'24.13" N, 15°4'49.67" E, 534 m ASL) and is surrounded by an agricultural landscape  
189 and forests, out of range of major sources of pollution with very low traffic density. The observatory is  
190 officially classified as a Central European rural background site, which is part of the EMEP, ACTRIS,  
191 and GAW networks. A characterization of the station in terms of the chemical composition of fine  
192 aerosols during different seasons and air masses is presented by Schwarz et al. (2016) and longtime  
193 trends by Mbengue et al. (2018) and Pokorná et al. (2018). As part of a monitoring network operated  
194 by the CHMI, the site is equipped with an automated monitoring system that provides meteorological  
195 data (wind speed and direction, relative humidity, temperature, pressure, and solar radiation) and the  
196 concentrations of gaseous pollutants ( $\text{SO}_2$ , CO, NO,  $\text{NO}_2$ ,  $\text{NO}_x$  and  $\text{O}_3$ ).

197

Deleted: carbonaceous

Deleted: together

Deleted: together

Deleted: an

Deleted: ¶  
These  $\delta^{13}\text{C}$  and  $\delta^{15}\text{N}$  studies show the potential of these isotopes to characterize aerosol types and the chemical processes that take place in them.

Deleted: this

Deleted: total carbon (

Deleted: )

Deleted: total nitrogen (

Deleted: )

Deleted: location

Deleted: the specialized workplace

Deleted: which is focused

Deleted: the quality of the environment

Deleted: a

Deleted: frequency of

217 **2.2. Sampling and weighing**

218

219 Aerosol samples were collected every two days for 24 h from September 27, 2013, to August 9, 2014,  
220 using a Leckel sequential sampler SEQ47/50 equipped with a PM1 sampling inlet. Some temporal gaps  
221 were caused by sampler maintenance or power outages resulting in 146 samples during the almost year-  
222 long study. The sampler was loaded with pre-baked (3 h, 800°C) quartz fiber filters (Tissuequartz, Pall,  
223 47 mm), and operated at a flow rate of 2.3 m<sup>3</sup>/h. In addition, field blanks (n = 7) were also taken for an  
224 analysis of the contribution of absorbable organic vapors.

225

226 The PM1 was measured gravimetrically (each filter before and after the sampling) with a microbalance  
227 that had ±1 µg sensitivity (Sartorius M5P, Sartorius AG, Göttingen, Germany) in a controlled  
228 environment (20±1 °C and 50±3 % relative humidity after filter equilibration for 24 h).

229

230 **2.3. Determination of TC, TN concentrations and their stable isotopes**

231

232 For the measurements of total carbon (TC) and nitrogen (TN) and their stable isotope ratios, small filter  
233 discs (area 0.5 cm<sup>2</sup>, 1.13 cm<sup>2</sup> or 2.01 cm<sup>2</sup>) were placed in a pre-cleaned tin cup, shaped into a small  
234 marble using a pair of tweezers, and introduced into the elemental analyzer (EA; Flash 2000, Thermo  
235 Fisher Scientific) using an autosampler. Inside the EA, samples were first oxidized in a quartz column  
236 heated at 1000°C, in which the tin marble burns and oxidizes all the carbon and nitrogen species to CO<sub>2</sub>  
237 and nitrogen oxides, respectively. In the second quartz column, heated to 750°C, nitrogen oxides were  
238 reduced to N<sub>2</sub>. Evolved CO<sub>2</sub> and N<sub>2</sub> were subsequently separated on a gas chromatographic column,  
239 which was installed in EA, and measured with a thermal conductivity detector for TC and TN. CO<sub>2</sub> and  
240 N<sub>2</sub> were then transferred into an isotope ratio mass spectrometer (IRMS; Delta V, Thermo Fisher  
241 Scientific) through a ConFlo IV interface to monitor the <sup>15</sup>N/<sup>14</sup>N and <sup>13</sup>C/<sup>12</sup>C ratios.

242

243 An acetanilide external standard (from Thermo Electron Corp.) was used to determine the calibration  
244 curves before every set of measurements for calculating TC, TN and their isotope values. The δ<sup>15</sup>N and  
245 δ<sup>13</sup>C values of the acetanilide standard were 11.89‰ (relative to the atmospheric nitrogen) and -27.26‰  
246 (relative to Vienna Pee Dee Belemnite standard), respectively. Subsequently, the δ<sup>15</sup>N of TN and δ<sup>13</sup>C  
247 of TC were calculated using the following equations and the final δ values are expressed in relation to  
248 the international standards:

249

250 
$$\delta^{15}\text{N} (\text{‰}) = [({}^{15}\text{N}/{}^{14}\text{N})_{\text{sample}} / ({}^{15}\text{N}/{}^{14}\text{N})_{\text{standard}} - 1] * 1000$$

251 
$$\delta^{13}\text{C} (\text{‰}) = [({}^{13}\text{C}/{}^{12}\text{C})_{\text{sample}} / ({}^{13}\text{C}/{}^{12}\text{C})_{\text{standard}} - 1] * 1000$$

252

Deleted: (n = 146)

Deleted: for 24 h

Deleted: in sampling

Deleted: outages and

Deleted: to

Deleted: sampler

Deleted: the

Deleted: was used

Deleted: mass of

Deleted: by gravimetric analysis of

Deleted: quartz

Deleted: ). The weighing of samples was performed at

Deleted: .

Deleted: analyses

Deleted: (~1400°C)

Deleted: Parts of

Deleted: -electron-corp

Deleted: the calculation of the right values of

Deleted: isotopic ratios



## 272 2.4. Ion chromatography

273

274 ~~The loads on the quartz~~ filters ~~was~~ further analyzed by using a Dionex ICS-5000 (Thermo Scientific,  
275 USA) ion chromatograph (IC). The samples were extracted using ultrapure water with conductivity  
276 below 0.08  $\mu\text{S/m}$  (Ultrapur, Watrex Ltd., Czech Rep.) for 0.5 h using an ultrasonic bath and 1 h using  
277 a shaker. The solution was filtered through a Millipore syringe filter with 0.22  $\mu\text{m}$  porosity. The filtered  
278 extracts were then analyzed for both anions ( $\text{SO}_4^{2-}$ ,  $\text{NO}_3^-$ ,  $\text{Cl}^-$ ,  $\text{NO}_2^-$  and oxalate) and cations ( $\text{Na}^+$ ,  $\text{NH}_4^+$ ,  
279  $\text{K}^+$ ,  $\text{Ca}^{2+}$  and  $\text{Mg}^{2+}$ ) in parallel. The anions were analyzed using an anion self-regenerating suppressor  
280 (ASRS 300) and an IonPac AS11-HC (2 x 250 mm) analytical column and ~~measured~~ with a Dionex  
281 conductivity detector. For cations, a cation self-regenerating suppressor (CSRS ULTRA II) and an  
282 IonPac CS18 (2 m x 250 mm) analytical column were used ~~in conjunction~~ with a Dionex conductivity  
283 detector. The separation of anions was conducted using 25 mM KOH as an eluent at a flow rate of 0.38  
284 ml/min, and the separation of cations was conducted using 25 mM methanesulfonic acid at 0.25 ml/min.

285

286 The sum of nitrate and ammonium nitrogen ~~showed a~~ good agreement with ~~the~~ measured TN (Fig. S1  
287 in Supplementary Information (SI)), and based on the results of TN,  $\text{NO}_3^-$  and  $\text{NH}_4^+$ , organic nitrogen  
288 (OrgN) was also calculated using ~~the~~ following equation (Wang et al., 2010):  $\text{OrgN} = \text{TN} - 14 \cdot [\text{NO}_3^-$   
289  $/62 + \text{NH}_4^+/18]$ .

290

## 291 2.5. EC/OC analysis

292

293 Online measurements of organic and elemental carbon (OC and EC) in aerosols were provided in  
294 parallel to the aerosol collection on quartz filters mentioned above by a field ~~semi-online~~ OC/EC  
295 analyzer (Sunset Laboratory Inc., USA) connected to a PM1 inlet. The instrument was equipped with a  
296 carbon parallel-plate denuder (Sunset Lab.) to remove volatile organic compounds to avoid a positive  
297 bias in the measured OC. Samples were taken at 4 h intervals, including the thermal-optical analysis,  
298 which lasts approximately 15 min. The analysis was performed using the shortened EUSAAR2  
299 protocol: step [gas] temperature [ $^{\circ}\text{C}$ ]/duration [s]: He 200/90, He 300/90, He 450/90, He 650/135, He-  
300 Ox. 500/60, He-Ox. 550/60, He-Ox. 700/60, He-Ox. 850/100 (Cavalli et al., 2010). Automatic optical  
301 corrections for charring were made during each measurement, and a split point between EC and OC  
302 was detected automatically (software: RTCalc526, Sunset Lab.). Instrument blanks were measured once  
303 per day at midnight, and they represent only a background instrument ~~response~~ without ~~filter exposure~~.  
304 Control calibrations using a sucrose solution were made before each change of the filter (ca. every 2<sup>nd</sup>  
305 week) to check the stability of instruments. The 24 h averages with identical measuring times, such as  
306 on quartz filters, were calculated from ~~the~~ acquired 4 h data. The sum of EC and OC provided ~~TC~~  
307 concentrations, which were consistent with ~~the~~ TC values measured by EA (see Fig. S2 in SI).

Deleted: Quartz

Deleted: were

Deleted: -

Deleted: detected

Deleted: together

Deleted: was in

Deleted: semionline

Deleted: signal

Deleted: any reflection on concentrations

Deleted: the

318

### 319 2.6. Spearman correlation calculations

320

321 Spearman correlation coefficients (r) were calculated using R statistical software (ver. 3.3.1). The  
 322 correlations were calculated for the annual dataset (n=139) and separately for each season (autumn: 25,  
 323 winter: 38, spring: 43, and summer: 33), and winter event (7). Data from the winter Event were excluded  
 324 from the annual and winter datasets for the correlation analysis as their distinctly high concentrations  
 325 and isotopic values might have affected the results. Correlations with p-values over 0.05 were taken as  
 326 statistically insignificant.

327

### 328 3. Results and discussion

329

330 The time series of TN, TC and their isotope ratios ( $\delta^{15}\text{N}$  and  $\delta^{13}\text{C}$ ) for the whole measurement campaign  
 331 are depicted in Fig. 1. Some sampling gaps were caused in autumn and at the end of spring by servicing  
 332 or outages of the sampler. However, 146 of the samples from September 27, 2013, to August 9, 2014,  
 333 are sufficient for a seasonal study. In Fig. 1, the winter Event is highlighted, which has divergent values,  
 334 especially for  $\delta^{15}\text{N}$ , and is discussed in detail in section 3.4.

335

336 Table 1 summarizes the results for four seasons: autumn (Sep.–Nov.), winter (Dec.–Feb.), spring (Mar.–  
 337 May) and summer (Jun.–Aug.). The higher TN concentrations were observed in spring (max.  $7.59 \mu\text{gN m}^{-3}$ ),  
 338 while the higher TC concentrations were obtained during the winter Event (max.  $13.6 \mu\text{gC m}^{-3}$ ).  
 339 Conversely, the lowest TN and TC concentrations were observed in summer (Tab. 1).

340

341 Figure 2 shows the relationships between the TC and TN concentrations and their stable isotopes for  
 342 one year. The correlation between TC and TN is significant ( $r=0.71$ ), but the relationship split during  
 343 high concentration events due to divergent sources. The highest correlations between TC and TN were  
 344 obtained during transition periods in autumn (0.85) and spring (0.80). Correlations between TC and TN  
 345 in winter (0.43) and summer (0.37) were weaker but still statistically significant ( $p<0.05$ ). As seen in  
 346 Table 1, the seasonal averages of TC/TN ratios fluctuate, but their medians have similar values for  
 347 autumn, winter and spring. The summer TC/TN value is higher (3.45) and characteristic of a significant  
 348 shift in chemical composition, which is in line with previous studies at the site (Schwarz et al., 2016).  
 349 However, seasonal differences in the TC/TN ratios were not as large as those in other works (e.g.,  
 350 Agnihotri et al., 2011), and thus, this ratio itself did not provide much information about aerosol sources.

351

- Deleted: Correlations
- Deleted: samples),
- Deleted: -
- Deleted: -
- Deleted: -
- Deleted: samples
- Deleted: the
- Deleted: Event
- Deleted: samples
- Deleted: .
- Deleted: Sampling
- Deleted: are caused
- Deleted: ; however
- Deleted: between
- Deleted: and
- Deleted: ,
- Deleted: enough
- Deleted: the
- Deleted: -
- Deleted: ),
- Deleted: -
- Deleted: ),
- Deleted: -
- Deleted: -
- Deleted: -
- Deleted: ).
- Deleted: Fig
- Deleted: 70
- Deleted: higher
- Deleted: , this dependence can be split
- Deleted: the different origins of these components
- Deleted: Correlations between TC and TN in winter (0.43) and in summer (0.37) were weaker but still statistically significant ( $p<0.05$ ). As seen in the TC/TN ratios (Table 1), seasonal TC/TN averages fluctuate, but their medians have similar values for autumn, winter and spring, while the summer value is higher (3.45) and roughly points to different aerosol composition in comparison with other seasons. However, seasonal differences between TC/TN ratios are
- Deleted: does

392 The correlation between  $\delta^{13}\text{C}$  and  $\delta^{15}\text{N}$  (Fig. 2, right) is also significant but negative (-0.69). However,  
 393 there is a statistically significant correlation for spring only (-0.54), while in other seasons, correlations  
 394 are statistically insignificant. This result highlights a significant shift in the sources of carbonaceous  
 395 aerosols and their isotope values in spring while the sources were rather stable during other seasons.  
 396 The winter *Event* measurements show the highest  $\delta^{13}\text{C}$  and lowest  $\delta^{15}\text{N}$  values, but a linear fit does not  
 397 show a significant differences as compared to rest of the data (Fig. 2, right).

399 **3.1. Total nitrogen and its  $\delta^{15}\text{N}$**

400  
 401 The  $\delta^{15}\text{N}$  values are stable in winter at approximately 15‰, with an exception of winter *Event*, which  
 402 showed an average of 13‰. In summer, the  $\delta^{15}\text{N}$  shows strong enrichment of  $^{15}\text{N}$  in comparison with  
 403 winter, resulting in an average value of 25‰. During the spring period, we observed a slow increase in  
 404  $\delta^{15}\text{N}$  from April to June (Fig. 1), indicating a gradual change in nitrogen chemistry in the atmosphere.  
 405 During autumn, a gradual change is not obvious because of a lack of data in a continuous time series.  
 406 The range of  $\delta^{15}\text{N}$  was from 0.6‰ to 28.2‰ year round. Such a wide range may arise from a limited  
 407 number of nitrogen-containing species and/or components in aerosols, which are specifically present in  
 408 the forms of  $\text{NO}_3^-$ ,  $\text{NH}_4^+$  and/or organic nitrogen (OrgN). The highest portion of nitrogen is contained  
 409 in  $\text{NH}_4^+$  (54 % of TN year-round), followed by OrgN (27 %) and  $\text{NO}_3^-$  (19 %). Although the  $\text{NH}_4^+$   
 410 content in TN is seasonally stable (51-58 %, Table 1), the  $\text{NO}_3^-$  content is seasonally dependent; the  
 411 highest in winter, and somewhat lower in spring and autumn. In summer, when the dissociation of  
 412  $\text{NH}_4\text{NO}_3$  plays an important role the  $\text{NO}_3^-$  content is very low and its nitrogen is partitioned from the  
 413 aerosol phase to gas phase (Stelson et al., 1979).

414  
 415 The seasonal trend of  $\delta^{15}\text{N}$  of TN, with the lowest values in winter and highest in summer, has been  
 416 observed in other studies from urban Paris (Widory, 2007), rural Brazil (Martinelli et al., 2002), East  
 417 Asian Jeju Island (Kundu et al., 2010) and rural Baengnyeong Island (Park et al., 2018) sites in Korea.  
 418 However, different seasonal trends of  $\delta^{15}\text{N}$  of TN in Seoul (Park et al., 2018) show that such seasonal  
 419 variation does not always occur.

420  
 421 Figure 3 shows changes in  $\delta^{15}\text{N}$  values as a function of the main nitrogen components in TN, with  
 422 different colors for different days. There are two visible trends for a type of nitrogen. Although  $^{15}\text{N}$  is  
 423 more depleted with increasing contents of  $\text{NO}_3^-$  in TN, the opposite is true for  $\text{NH}_4^+$  and OrgN. The  
 424 strongest dependence for most bulk data is expressed by a strong negative correlation between  $\delta^{15}\text{N}$  and  
 425 the fraction of  $\text{NO}_3^-$  in TN (Fig. 3). In all cases, the dependence during the winter *Event* is completely  
 426 opposite to the rest of the bulk data (Fig. 3), suggesting the presence of different processes for  $\delta^{15}\text{N}$

- Deleted: 71
- Deleted: (autumn: -0.29, winter: -0.11 and summer: 0.07).
- Deleted: shows that
- Deleted: and related changes
- Deleted: isotopic composition of nitrogen together with carbon occur especially
- Deleted: ,
- Deleted: there are
- Deleted: sources of particles
- Deleted: winter and summer.
- Deleted: values
- Deleted: the
- Deleted: they are still in line with the
- Deleted: fitting of all annual
- Deleted: the
- Deleted: the
- Deleted: deviated by
- Deleted: observe
- Deleted: Year round,
- Deleted: ranged
- Deleted: ‰.
- Deleted: large
- Deleted: originate
- Deleted: the
- Deleted: main compounds
- Deleted: nitrogen
- Deleted: is
- Deleted: form
- Deleted: ), and thus, the final  $\delta^{15}\text{N}$  value in TN can be (... [1])
- Moved up [1]:  $\delta^{15}\text{N}_{\text{TN}} = \delta^{15}\text{N}_{\text{NO}_3^-} \cdot f_{\text{NO}_3^-} + \delta^{15}\text{N}_{\text{NH}_4^+} \cdot f_{\text{NH}_4^+} +$
- Deleted: While
- Deleted: – higher
- Deleted: similarly balanced
- Deleted: , and very low in
- Deleted: ,
- Deleted: ,
- Deleted: the
- Deleted: in
- Deleted: in
- Deleted: of
- Deleted: of the
- Deleted: share
- Deleted: ) showing
- Deleted: on

477 values, which is characterized by a strong positive correlation between  $\delta^{15}\text{N}$  and  $\text{NO}_3^-/\text{TN}$  (0.98).  
478 This point will be discussed in section 3.4.

**Deleted:** formation... which is characterized highlighted... by a very ... [2]

479  
480 Considering the individual nitrogen components, several studies (Freyer, 1991; Kundu et al., 2010;  
481 Yeatman et al., 2001b) showed seasonal trends of  $\delta^{15}\text{N}$  of  $\text{NO}_3^-$ , with the lowest  $\delta^{15}\text{N}$  in summer and the  
482 highest in winter. Savard et al. (2017 and references therein) summarized four possible reasons for this  
483 seasonality of  $\delta^{15}\text{N}$  of  $\text{NO}_3^-$ : namely, (i) changes in  $\text{NO}_x$  emissions, (ii) influence of wind directions in  
484 the relative contributions from sources with different isotopic compositions, (iii) the effect of  
485 temperature on isotopic fractionation and (iv) chemical transformations of nitrogen oxides over time  
486 with a lower intensity of sunlight, which can lead to higher  $\delta^{15}\text{N}$  values of atmospheric nitrate during  
487 winter months, as shown by Walters et al. (2015a). In our study, it is most likely that all these factors  
488 contributed, to a certain extent, to the nitrogen isotopic composition of  $\text{NO}_3^-$  throughout the year.

**Deleted:** show... seasonal trends of  $\delta^{15}\text{N}$  of  $\text{NO}_3^-$ , with the lowest  $\delta^{15}\text{N}$  in summer and the highest in winter. Savard et al. (2017 and references therein) Savard et al. (2017 and references therein)... summarized four possible reasons for this seasonality of  $\delta^{15}\text{N}$  of  $\text{NO}_3^-$ ; namely, that is... (i) changes in  $\text{NO}_x$  emissions strength... (ii) influence of wind directions in the relative contributions from sources with different isotopic compositions composition... (iii) the effect of temperature on isotopic fractionation and (iv) chemical transformations of nitrogen oxides over time with a lower intensity of sunlight, which can lead to higher  $\delta^{15}\text{N}$  values of atmospheric nitrate during winter months, as shown by Walters et al. (2015a). In the case of... our study, it is most likely that data, mixing of... all of... these factors contributed, to a certain extent, to the nitrogen probably had an influence on the nitrate... isotopic composition of  $\text{NO}_3^-$  throughout during different parts of ... [3]

490 Conversely, Kundu et al. (2010) reported higher  $\delta^{15}\text{N}$  values of  $\text{NH}_4^+$  in summer than in winter and  
491 reported higher  $\delta^{15}\text{N}$  values of  $\text{NH}_4^+$  than  $\text{NO}_3^-$ , except for winter season. In sum, the contribution of  
492  $\text{NH}_4^+$  to  $\delta^{15}\text{N}$  overwhelms that of  $\text{NO}_3^-$ . Additionally, TN is composed of  $\text{NH}_4^+$ ,  $\text{NO}_3^-$  and OrgN. In  
493 Figure 3, we can observe an enrichment of  $^{15}\text{N}$  in TN in summer when the lowest  $\text{NO}_3^-$  contribution  
494 occurs. Thus, higher  $\delta^{15}\text{N}$  values of TN in summer are mainly caused by higher abundances of  $\text{NH}_4^+$   
495 originating from  $(\text{NH}_4)_2\text{SO}_4$ , OrgN and ammonium salts of organic acids.

**Deleted:** generally... reported higher  $\delta^{15}\text{N}$  values of  $\text{NH}_4^+$  than in...  $\text{NO}_3^-$ ;... except for winter season. In sum, the contribution of  $\text{NH}_4^+$  to  $\delta^{15}\text{N}$  overwhelms that the contribution... of  $\text{NO}_3^-$  to  $\delta^{15}\text{N}$ ... Additionally, TN is composed of  $\text{NH}_4^+$ ,  $\text{NO}_3^-$  and OrgN. In Figure Fig... 3, we can observe an... enrichment of  $^{15}\text{N}$  in TN in summer when the lowest  $\text{NO}_3^-$  contribution occurs. Thus, higher  $\delta^{15}\text{N}$  values of  $\delta^{15}\text{N}$  in ... [4]

497 Furthermore, we observed one of the largest enrichments of  $^{15}\text{N}$  of TN in summer aerosols as compared  
498 to previous studies (Kundu et al., 2010 and references therein), which may be explained by several  
499 reasons. First, the previous studies mainly focused on total suspended particles (TSP); however, we  
500 focused on the fine fraction (PM1), whose surface should be more reactive due to a larger surface area  
501 per unit of aerosol mass than the coarse fraction and consequently result in a higher abundance of  $^{15}\text{N}$   
502 during the gas/particle partitioning between  $\text{NH}_3$  and  $\text{NH}_4^+$ . Second, fine accumulation mode particles  
503 have a longer residence time in the atmosphere than the coarse mode fraction, which is also a factor  
504 that results in an enrichment of  $^{15}\text{N}$ . Indeed, Mkoma et al. (2014) reported average higher  $\delta^{15}\text{N}$  of TN  
505 in fine (17.4‰, PM2.5) than coarse aerosols (12.1‰, PM10). Freyer (1991) also reported higher  $\delta^{15}\text{N}$   
506 of  $\text{NO}_3^-$  (4.2‰ to 8‰) in fine aerosols (< 3.5  $\mu\text{m}$ ) in comparison with the coarse mode (-1.4‰ to 5.5‰).  
507 Third, a shorter sampling interval of our work (24 h) leads to more chance to collect episodic samples  
508 such as the winter Event, which could not be clearly detected due to averaged (overlapped) aerosols  
509 over a longer sampling period (e.g., weekly samples).

**Deleted:** in summer, ... we observed one of the largest enrichments of  $^{15}\text{N}$  of TN in summer aerosols as compared to previous in comparison with other... studies (Kundu et al., 2010 and references therein), which may be explained by due to... several reasons. First, the previous studies works mentioned above... mainly focused on studied... total suspended particles (TSP); aerosols;... however, we focused focus... on the fine PM1 fraction (PM1), whose surface, which... should be more reactive due to a larger surface area per unit of aerosol mass than the coarse fraction and consequently result in a higher abundance of  $^{15}\text{N}$  during the gas/particle partitioning between of...  $\text{NH}_3$  and  $\text{NH}_4^+$ . Second, the... fine accumulation aerosol fraction of the Aitken... mode particles have persists for... a longer residence period of... time in the atmosphere than the coarse mode fraction, which is also a factor that results in an leading to higher  $^{15}\text{N}$ ... enrichment of  $^{15}\text{N}$ . Indeed, Mkoma et al. (2014) reported average higher  $\delta^{15}\text{N}$  of in... TN in fine aerosols... 17.4‰, PM2.5) than in comparison with... coarse aerosols (12.1‰, PM10.), and... Freyer (1991) also reported higher  $\delta^{15}\text{N}$  of in...  $\text{NO}_3^-$  (4.2‰ to 8‰) in fine aerosols (< 3.5  $\mu\text{m}$ ) in comparison with the coarse mode (-1.4‰ to 5.5‰). Third, a shorter sampling interval of our time in this... work (24 h) leads to more chance to collect the collection of samples with... episodic samples such as values (see... the winter Event, which could not) that would... be clearly detected due to averaged (overlapped) aerosols over a longer sampling period time resolution ... [5]

511 Similarly, as in this study, the highest  $\delta^{15}\text{N}$  values in TN were observed in a few studies from the Indian  
512 region (Aggarwal et al., 2013; Bikina et al., 2016; Pavuluri et al., 2010) where biomass burning is the  
513 common source, and ambient temperatures are high. Therefore, in addition to the above reasons,

618 temperature also plays a significant role in  $^{15}\text{N}$  enrichment. This point will be discussed in more detail  
619 in section 3.3.

620

621 Figure 4 shows the  $\delta^{15}\text{N}$  of TN as a function of  $\text{NO}_3^-$  concentration. Samples with the highest  $\text{NO}_3^-$   
622 concentrations ( $>6 \mu\text{g m}^{-3}$ ,  $n=5$ ) show an average  $\delta^{15}\text{N}$  of  $13.3\pm 0.7\text{‰}$ . Assuming that  $\text{NO}_3^-$  in the fine  
623 aerosol fraction consists predominantly of  $\text{NH}_4\text{NO}_3$  (Harrison and Pio, 1983), it can be stated that  
624 ammonium nitrate is a source of nitrogen at the Košetice site, with  $\delta^{15}\text{N}$  values at approximately  $13.3\text{‰}$ ,  
625 which is similar to the winter values of  $\delta^{15}\text{N}$  in  $\text{NO}_3^-$  in other studies. Specifically, Kundu et al. (2010)  
626 reported a winter average of  $\delta^{15}\text{N}$  of  $\text{NO}_3^-$  at  $+15.9\text{‰}$  from a Pacific marine site at Gosan Island, South  
627 Korea, whereas Freyer (1991) reported  $+9.2\text{‰}$  in a moderately polluted site from Jülich, Germany.  
628 Yeatman et al. (2001) reported approximately  $+9\text{‰}$  from a Weybourne coastal site, UK. Park et al.  
629 (2018) reported  $11.9\text{‰}$  in Seoul and  $11.7\text{‰}$  from a rural site in Baengnyeong Island, Korea.

630

631 Considering the  $\delta^{15}\text{N}$  of nitrogen oxides, which are common precursors of particulate nitrate, we can  
632 see that the  $\delta^{15}\text{N}$  of nitrogen oxides generated by coal combustion (Felix et al., 2012;  $+6$  to  $+13\text{‰}$ ,  
633 Heaton, 1990) or biomass burning ( $+14\text{‰}$ , Felix et al., 2012) are in the same range with our  $\delta^{15}\text{N}$  during  
634 the period of enhanced concentrations of  $\text{NO}_3^-$ . These  $\delta^{15}\text{N}$  values of nitrogen oxides are also  
635 significantly higher than those from vehicular exhaust ( $-13$  to  $-2\text{‰}$  Heaton, 1990;  $-19$  to  $+9\text{‰}$  Walters  
636 et al., 2015b) or biogenic soil ( $-48$  to  $-19\text{‰}$ , Li and Wang, 2008). Because of the only slight difference  
637 between above reported  $\delta^{15}\text{N}$  of nitrogen oxides and our  $\delta^{15}\text{N}$  of TN during maximal  $\text{NO}_3^-$  events, the  
638 isotope composition is probably influenced by the process of kinetic isotopic fractionation in fossil fuel  
639 combustion samples during heating season as referred by Cieżka et al. (2016) as one of three possible  
640 processes. Thus,  $\delta^{15}\text{N}$  values around  $13.3\text{‰}$  (Fig. 4) are probably characteristic of fresh emissions from  
641 heating (both coal and biomass burning) because these values are obtained during the domestic heating  
642 season.

643

644 The exponential curves in Fig. 4 represent a boundary in which  $\delta^{15}\text{N}$  values are migrating as a result of  
645 the enrichment or depletion of  $^{15}\text{N}$ , which is associated with the removal or loading of  $\text{NO}_3^-$  in aerosols.  
646 These curves represent two opposite chemical processes, with a match at approximately  $13.3\text{‰}$ , which  
647 showed a strong logarithmic correlation ( $r=0.96$  during winter Event, green line, and  $-0.81$  for the rest  
648 of points, black line, Fig. S3). These results indicate a significant and different mechanism by which  
649 nitrogen isotopic fractionation occurs in aerosols. In both cases, the decrease in nitrate leads to  
650 exponential changes in the enrichment or depletion of  $^{15}\text{N}$  from a value of  $13.3\text{‰}$ . In the case of  
651 enrichment, in addition to a higher proportion of  $\text{NH}_4^+$  than  $\text{NO}_3^-$ , the dissociation process of  $\text{NH}_4\text{NO}_3$   
652 can cause an increase in  $^{15}\text{N}$  of TN during a period of higher ambient temperatures, as hypothesized by  
653 Pavuluri et al. (2010).

654

Deleted: in

Deleted: . The  $\delta^{15}\text{N}$  shows a peak at approximately  $14\pm 1\text{‰}$

Deleted: increasing nitrate

Deleted: at the Košetice site

Deleted: 14

Deleted: value

Deleted: in

Deleted: a

Deleted: Thus,  $\delta^{15}\text{N}$  values of approximately  $14\text{‰}$  (Fig.

Deleted: the

Deleted: 14

Deleted: approximately 14

Deleted: in

668 OrgN has not been widely studied as compared to particulate  $\text{NO}_3^-$  and  $\text{NH}_4^+$ , although it represents a  
 669 significant fraction of TN (e.g., Jickells et al., 2013; Neff et al., 2002; Pavuluri et al., 2015). Figure 5  
 670 shows the relationship between  $\delta^{15}\text{N}$  of TN and OrgN. Organic nitrogen consists organic compounds  
 671 containing nitrogen in water soluble and insoluble fractions. The majority of samples have a  
 672 concentration range of 0.1-0.5  $\mu\text{g m}^{-3}$  (gray highlight in Fig. 5), which can be considered as background  
 673 OrgN at the Košetice site. During the domestic heating season with the highest concentrations of  $\text{NO}_3^-$   
 674 and  $\text{NH}_4^+$ , we can observe a significant increase in OrgN with  $\delta^{15}\text{N}$  again at approximately 13.3‰,  
 675 which implies that the isotopic composition of OrgN is determined by the same source. In the case of  
 676 emissions from combustion, OrgN originates mainly from biomass burning (Jickells et al., 2013 and  
 677 references therein), and thus, elevated concentrations of OrgN (as well as high  $\text{NO}_3^-$  and  $\text{NH}_4^+$  conc.)  
 678 may refer to this source. On the other hand, looking at the trend of OrgN/TN in dependence on  $\delta^{15}\text{N}$   
 679 (Fig. 3), it is more similar to the trend of  $\text{NH}_4^+$ -N/TN than  $\text{NO}_3^-$ -N/TN. Thus, it can be considered that  
 680 the changes in the  $\delta^{15}\text{N}$  of OrgN in samples highlighted as a gray area in Fig. 5 are probably driven  
 681 more by the same changes in  $\text{NH}_4^+$  particles, and especially in summer with elevated OrgN in TN (Table  
 682 1).

### 684 3.2. Total carbon and its $\delta^{13}\text{C}$

685  
 686 The  $\delta^{13}\text{C}$  of TC ranged from -28.9 to -25.4‰ (Fig. 6) and the lowest  $\delta^{13}\text{C}$  we observed in field blank  
 687 samples (mean -29.2‰, n=7), indicating that the lowest summer values in particulate matter were close  
 688 to gas phase values. Our  $\delta^{13}\text{C}$  values are within the range reported for particulate TC (-29‰ to -15‰)  
 689 as summarized by Gensch et al. (2014). The lowest values are associated with fine particles after  
 690 combustion and transport (Ancelet et al., 2011; Widory, 2006) while the highest values are associated  
 691 with the coarse fraction and carbonate contribution (Kawamura et al., 2004). This broad range can be  
 692 explained by the influence of marine aerosols (Ceburnis et al., 2016), different anthropogenic sources  
 693 (e.g., Widory et al., 2004), as well as different distributions of C3 and C4 plants (Martinelli et al., 2002)  
 694 resulting in different  $\delta^{13}\text{C}$  values in the northern and southern hemispheres (Cachier, 1989). The  $\delta^{13}\text{C}$   
 695 values at the Košetice site fall within the range common to other European sites. For example, a rural  
 696 background site in Vavihill (southern Sweden, range -26.7 to -25.6‰, Martinsson et al. (2017)), urban  
 697 Wroclaw (Poland, range -27.6 to -25.3‰, Górká et al. (2014)), different sites (urban, coastal, forest) in  
 698 Lithuania (East Europe, Masalaite et al., 2015, 2017), as well as urban Zurich (Switzerland, Fisseha et  
 699 al. (2009)).

700 The range of TC  $\delta^{13}\text{C}$  values is significantly narrower than that of TN  $\delta^{15}\text{N}$  due to a higher number of  
 701 carbonaceous components in the aerosol mixture whose isotope ratio overlaps one another. However,  
 702 it is possible to distinguish lower  $\delta^{13}\text{C}$  values in summer (Table 1), which may indicate a contribution  
 703 from higher terrestrial plant emissions. Similarly, Martinsson et al. (2017) reported lower  $\delta^{13}\text{C}$  values

Deleted: in

Deleted: 14

Deleted: process during maximal  $\text{NO}_3^-$  concentrations, that is, emissions from domestic heating

Deleted: together with

Deleted: assumed

Deleted: in

Moved down [2]: a rural background site in Vavihill (southern Sweden, range -26.7 to -25.6‰, Martinsson et al. (2017)), urban Wroclaw (Poland, range -27.6 to -25.3‰,

Deleted: The  $\delta^{13}\text{C}$  of TC ranged between -25.4‰ and -28.9‰ (Fig. 6), which is similar but broader than the range reported at

Deleted: Górká et al. (2014)), and different sites (urban, coastal, forest) in Lithuania (East Europe, Masalaite et al., 2015, 2017) but similar to those published by Fisseha et al. (2009) in Zurich. However, our  $\delta^{13}\text{C}$  values are smaller than those reported for coastal TSP aerosols from Okinawa (East Asia, range -24.2 to -19.5‰, Kunwar et al. (2016)) or rural Tanzania (Central-East Africa, range -26.1 to -20.6‰ in PM2.5, Mkoma et al. (2014)). In fact, similar or different  $\delta^{13}\text{C}$  values are widely reported in the northern and southern hemispheres

Deleted: , which can be explained by different distributions of C3 and C4 plants (Martinelli et al., 2002), the influence of marine aerosols (Ceburnis et al., 2016), as well as different anthropogenic sources (e.g., Widory et al., 2004)

Moved down [3]: The  $\delta^{13}\text{C}$  values at the Košetice site fall within the range common to other European sites.

Deleted: The  $\delta^{13}\text{C}$  values are significantly smaller than those of  $\delta^{15}\text{N}$  due to a higher number of carbonaceous compounds in the aerosol mixture whose isotope ratio overlaps each other.

Moved down [4]: However, it is possible to distinguish lower  $\delta^{13}\text{C}$  values in summer (Table 1), which may indicate a contribution from higher terrestrial plant emissions. Similarly, Martinsson et al. (2017) reported lower  $\delta^{13}\text{C}$  values in summer in comparison with other seasons, which they explain by high biogenic aerosol contributions from C3 plants.¶

Deleted: ¶  
 A comparison of  $\delta^{13}\text{C}$  with TC in Fig. 6 shows an enhanced enrichment of  $^{13}\text{C}$  at higher TC concentrations. The lowest  $\delta^{13}\text{C}$  values were observed in field blank samples (mean -29.2‰, n=7), indicating that the lowest summer values in particulate matter were close to gas phase values.

Moved (insertion) [3]

Moved (insertion) [2]

Moved (insertion) [4]

750 in summer in comparison with other seasons, which they explain by high biogenic aerosol contributions  
751 from C3 plants.

752 A similar dependence of  $\delta^{13}\text{C}$  on the TC concentration was observed by Fisseha et al. (2009), where  
753 winter  $^{13}\text{C}$  enrichment was associated with WSOC (water soluble organic carbon) that originated mainly  
754 from wood combustion. Similarly, at the Košetice station, different carbonaceous aerosols were  
755 observed during the heating season (Oct.–Apr.) than in summer (Mbengue et al., 2018; Vodička et al.,  
756 2015). Moreover, winter aerosols at the Košetice site were probably affected by not only biomass  
757 burning but also coal burning (Schwarz et al., 2016), which can result in higher carbon contents and  
758 more  $^{13}\text{C}$ -enriched particles (Widory, 2006). Furthermore, based on the number of size distribution  
759 measurements at the Košetice site, larger particles were observed in winter in comparison with summer,  
760 even in the fine particle fraction (Žíková and Ždímal, 2013), which can also have an effect on lower  
761  $\delta^{13}\text{C}$  values in summer. Thus, the relatively low  $\delta^{13}\text{C}$  values in our range (up to  $-28.9\%$ ) are because  
762 fine particles have lower  $\delta^{13}\text{C}$  values in comparison with coarse particles probably due to different  
763 sources of TC. (e.g., Masalaite et al., 2015; Skipitytė et al., 2016).

**Deleted:** A comparison of  $\delta^{13}\text{C}$  with TC in Fig. 6 shows an enhanced enrichment of  $^{13}\text{C}$  at higher TC concentrations.

**Deleted:** whereby

**Deleted:** , whereby

**Deleted:** combustion

**Deleted:** burning of

**Moved (insertion) [5]**

**Deleted:**

**Deleted:** However, relatively low  $\delta^{13}\text{C}$  values in our range (up to  $-28.9\%$ ) are caused by not only sources of TC but also a the fact that fine particles are more  $^{13}\text{C}$  depleted in comparison with coarse particles

**Moved up [5]:** Furthermore, based on the number of size distribution measurements at the Košetice site, larger particles were observed in winter in comparison with summer, even in the fine particle fraction (Žíková and Ždímal, 2013), which can also have an effect on lower  $\delta^{13}\text{C}$  values in summer.

**Deleted:**

### 765 3.3. Temperature dependence and correlations of $\delta^{15}\text{N}$ and $\delta^{13}\text{C}$ with other variables

766

767 Tables 2 and 3 show Spearman's correlation coefficients ( $r$ ) of  $\delta^{15}\text{N}$  and  $\delta^{13}\text{C}$  with different variables  
768 that may reflect some effects on isotope distributions. In addition to year-round correlations,  
769 correlations for each season, as well as for the *Event*, are presented separately.

**Deleted:** these isotopes

770

771 Correlations of  $\delta^{15}\text{N}$  in winter and summer are often opposite (e.g., for TN  $-0.40$  in winter vs.  $0.36$  in  
772 summer, for  $\text{NH}_4^+$   $-0.42$  in winter vs.  $0.40$  in summer), indicating that aerosol chemistry at the nitrogen  
773 level is different in these seasons. Similarly, the contradictory dependence between  $\delta^{15}\text{N}$  and TN in  
774 summer and winter was observed by Widory (2007) in PM10 samples from Paris. Widory (2007)  
775 connected this result with different primary nitrogen origin (road-traffic emissions in summer and no  
776 specific source in winter) and following secondary processes associated with isotope fractionation  
777 during degradation of atmospheric  $\text{NO}_x$  leading to two distinct pathways for  $^{15}\text{N}$  enrichment (summer)  
778 and depletion (winter).

**Deleted:** see

**Deleted:** changes in

**Deleted:** are

**Deleted:** on PM10 samples from Paris and was connected with secondary processes affecting the nitrogen chemistry that follows two distinct pathways between

779

780 From a meteorological point of view, a significant correlation of  $\delta^{15}\text{N}$  with temperature has been  
781 obtained, indicating the influence of temperature on the nitrogen isotopic composition. The dependence  
782 of  $\delta^{15}\text{N}$  of TN on temperature (Fig. 7) is similar to that observed by Cieżka et al. (2016) for  $\delta^{15}\text{N}$  of  
783  $\text{NH}_4^+$  from precipitation; however, it is the opposite of that observed by Freyer (1991) for  $\delta^{15}\text{N}$  of  $\text{NO}_3^-$ .  
784 The aforementioned studies concluded that the isotope equilibrium exchange between nitrogen oxides  
785 and particulate nitrates is temperature dependent and could lead to more  $^{15}\text{N}$  enriched  $\text{NO}_3^-$  during the

**Deleted:** Dependence

**Deleted:** in

**Deleted:** to

**Deleted:** in

**Deleted:** ; however, it is same to that observed by Cieżka et al. (2016) for  $\delta^{15}\text{N}$  in  $\text{NH}_4^+$  from precipitation. These authors

816 cold season (Freyer et al., 1993; Savard et al., 2017). Although Savard et al. (2017) reported a similar  
817 negative temperature dependence for  $\delta^{15}\text{N}$  of  $\text{NH}_4^+$  in Alberta (Canada), most studies reported a positive  
818 temperature dependence for  $\delta^{15}\text{N}$  of  $\text{NH}_4^+$  that is stronger than that for  $\delta^{15}\text{N}$  of  $\text{NO}_3^-$  (e.g., Kawashima  
819 and Kurahashi, 2011; Kundu et al., 2010). The reason is that  $\text{NH}_3$  gas concentrations are higher during  
820 warmer conditions, and thus the isotopic equilibrium exchange reaction, i.e.,  $\text{NH}_3(\text{g}) \leftrightarrow \text{NH}_4^+(\text{p})$ , which  
821 leads to  $^{15}\text{N}$  enrichment in particles, is more intensive.

822  
823 All the considerations mentioned above indicate that a resulting relationship between  $\delta^{15}\text{N}$  of TN and  
824 temperature is driven by the prevailing nitrogen species, which is  $\text{NH}_4^+$  in our case. A similar  
825 dependence was reported by Pavuluri et al. (2010) between temperature and  $\delta^{15}\text{N}$  of TN in Chennai  
826 (India), where  $\text{NH}_4^+$  strongly prevailed. They found the best correlation between  $\delta^{15}\text{N}$  and temperature  
827 during the colder period (range 18.4-24.5°C, avg. 21.2°C); however, during warmer periods, this  
828 dependence was weakened. In our study, we observed the highest correlation of  $\delta^{15}\text{N}$  with temperature  
829 in autumn ( $r=0.58$ , temp. range -1.9 to 13.9°C, avg. 6.6°C), followed by spring ( $r=0.52$ , temp. range  
830 1.5-18.7°C, avg. 9.3°C), but there was even a negative but insignificant correlation in summer (temp.  
831 range: 11.8-25.5°C, avg. 17.7°C). This result indicates that ambient temperature plays an important role  
832 in the enrichment/depletion of  $^{15}\text{N}$ ; however, it is not determined by a specific temperature range but  
833 rather the conditions for repeating the process of "evaporation/condensation", as shown by the  
834 comparison with the work of Pavuluri et al. (2010). It is likely that isotopic fractionation caused by the  
835 equilibrium reaction of  $\text{NH}_3(\text{g}) \leftrightarrow \text{NH}_4^+(\text{p})$  reaches a certain level of enrichment under higher  
836 temperature conditions in summer.

837  
838 In summer,  $\delta^{15}\text{N}$  correlates positively with  $\text{NH}_4^+$  ( $r=0.40$ ) and  $\text{SO}_4^{2-}$  (0.51), indicating a link with  
839  $(\text{NH}_4)_2\text{SO}_4$  that is enriched by  $^{15}\text{N}$  due to aging. Figure 8 shows an enrichment of  $^{15}\text{N}$  as a function of  
840 the molar ratio of  $\text{NH}_4^+/\text{SO}_4^{2-}$ . The highest  $\text{NH}_4^+/\text{SO}_4^{2-}$  ratios, showing an ammonia rich atmosphere,  
841 were observed during winter, late autumn and early spring along with high abundance of  $\text{NO}_3^-$  that is  
842 related to favorable thermodynamic conditions during heating season and enough ammonia in the  
843 atmosphere. Gradual decreasing molar ratios of  $\text{NH}_4^+/\text{SO}_4^{2-}$  during spring indicate a gradual increase of  
844 ambient temperatures and therefore worsened thermodynamic conditions for  $\text{NO}_3^-$  formation in aerosol  
845 phase, which was accompanied by a visible decrease in the nitrate content in aerosols (Fig. 8). The  
846 increase of temperatures finally leads to the  $\text{NH}_4^+/\text{SO}_4^{2-}$  ratio reaching 2 at the turn of spring and summer.  
847 Finally, summer values of  $\text{NH}_4^+/\text{SO}_4^{2-}$  molar ratio below 2 indicate that  $\text{SO}_4^{2-}$  in aerosol particles at high  
848 summer temperatures may not be completely saturated with ammonium but it can be composed from  
849 mixture of  $(\text{NH}_4)_2\text{SO}_4$  and  $\text{NH}_4\text{HSO}_4$  (Weber et al., 2016). The equilibrium reaction between these two  
850 forms of ammonium sulfates related to temperature oscillation during a day and due to vertical mixing  
851 of the atmosphere is a probable factor which leads to increased values of  $\delta^{15}\text{N}$  in early summer.  
852 Ammonia measurements, that were carried out at the Košetice site until 2001, showed that  $\text{NH}_3$

Deleted: in

Deleted: dependence at temperatures

Deleted: such as for  $\text{NO}_3^-$ ,

Deleted: reported the opposite temperature dependence for  $\delta^{15}\text{N}$  in  $\text{NH}_4^+$  because the

Deleted: more abundant

Deleted: warm weather

Deleted: ,

Deleted: ) leading

Deleted: final

Deleted: in

Deleted: in

Deleted:  $r=-0.21$ ,

Deleted: "

Deleted: ",



868 concentrations in summer were slightly higher than in winter  
869 ([http://portal.chmi.cz/files/portal/docs/uoco/isko/tab\\_roc/2000\\_enh/CZE/kap\\_18/kap\\_18\\_026.html](http://portal.chmi.cz/files/portal/docs/uoco/isko/tab_roc/2000_enh/CZE/kap_18/kap_18_026.html)),  
870 which supports temperature as a main factor influencing  $\text{NH}_4^+/\text{SO}_4^{2-}$  ratio at Košetice. In this context,  
871 we noticed that 25 out of 33 summer samples have molar ratios of  $\text{NH}_4^+/\text{SO}_4^{2-}$  below 2, and the  
872 remaining samples are approximately 2, and the relative abundance of  $\text{NO}_3^-$  in PM1 in those samples is  
873 very low (ca. 1.7 %).

874  
875 Recently, Silvern et al. (2017) reported that organic aerosols can play a role in modifying or retarding  
876 the achievement of  $\text{H}_2\text{SO}_4\text{-NH}_3$  thermodynamic equilibrium at  $\text{NH}_4^+/\text{SO}_4^{2-}$  molar ratios of less than 2,  
877 even when sufficient amounts of ammonia are present in gas phase. Thus, an interaction between  
878 sulfates and ammonia may be hindered due to the preferential reaction with aged aerosols coated with  
879 organics (Liggio et al., 2011). In thermodynamic equilibrium, partitioning between gas ( $\text{NH}_3$ ) and  
880 aerosol ( $\text{NH}_4^+$ ) phases should result in even larger  $\delta^{15}\text{N}$  values of particles in summer, however,  
881 measurements show a different situation. Summer  $\delta^{15}\text{N}$  values are highest but further enrichment was  
882 stopped. Moreover, we observed a positive (and significant) correlation between temperature and  $\delta^{13}\text{C}$   
883 ( $r=0.39$ ) only in summer, whereas the correlation coefficient of  $\delta^{15}\text{N}$  vs. temperature is statistically  
884 insignificant, suggesting that while values of  $\delta^{15}\text{N}$  reached their maxima, the  $\delta^{13}\text{C}$  can still grow with  
885 even higher temperatures due to the influence of organics in summer season.

886  
887 As seen in Table 3, summertime positive correlations of  $\delta^{13}\text{C}$  with ozone ( $r=0.66$ ) and temperature  
888 (0.39) indicate oxidation processes that can indirectly lead to an enrichment of  $^{13}\text{C}$  in organic aerosols  
889 that are enriched with oxalic acid (Pavuluri and Kawamura, 2016). This result is also supported by the  
890 fact that the content of oxalate in PM1, measured by IC, was twice as high in spring and summer than  
891 in winter and autumn. The influence of temperature on  $\delta^{13}\text{C}$  in winter is opposite to that in summer.  
892 The negative correlation (-0.35) in winter probably indicates more fresh emissions from domestic  
893 heating (probably coal burning) with higher  $\delta^{13}\text{C}$  values during cold season.

894  
895 The whole year temperature dependence on  $\delta^{13}\text{C}$  is the opposite of that observed for  $\delta^{15}\text{N}$  (Fig. 7, left),  
896 suggesting more  $^{13}\text{C}$ -depleted products in summer. This result is probably connected with different  
897 carbonaceous aerosols during winter (anthropogenic emissions from coal, wood and biomass burning  
898 with the enrichment of  $^{13}\text{C}$ ) in comparison with the summer season (primary biogenic and secondary  
899 organic aerosols with lower  $\delta^{13}\text{C}$ ) (Vodička et al., 2015). The data of  $\delta^{13}\text{C}$  in Fig. 7 are also more  
900 scattered, which indicates that in the case of carbon, the isotopic composition depends more on sources  
901 than on temperature.

902  
903 Correlations of  $\delta^{13}\text{C}$  with OC are significant in all seasons; they are strongest in spring and weakest in  
904 summer (Table 3). Correlations of  $\delta^{13}\text{C}$  with EC, whose main sources are combustion processes from

**Deleted:** Figure 8 shows a decreasing molar ratio of  $\text{NH}_4^+/\text{SO}_4^{2-}$  with increasing  $^{15}\text{N}$  enrichment, especially during spring, indicating a gradual uptake of ammonia in the gas phase to aerosol phase. With a decreasing  $\text{NH}_4^+/\text{SO}_4^{2-}$  molar ratio, there is also a visible decrease in the nitrate content in aerosols (Fig. 8). However, when the  $\text{NH}_4^+/\text{SO}_4^{2-}$  ratio approaches a value below 2, there is not enough available ammonia in the gas phase, leading to the exclusion of nitrate from the aerosol phase, as well as to the disruption of the thermodynamic equilibrium between  $\text{NH}_3(\text{g}) \leftrightarrow \text{NH}_4^+(\text{p})$ , which previously led to  $^{15}\text{N}$  enrichment in the particles. In this context, we note that 25 out of 33 summer samples have molar  $\text{NH}_4^+/\text{SO}_4^{2-}$  ratios below 2, and the remaining samples are approximately 2, although the average relative abundance of  $\text{NO}_3^-$  in PM1 in those samples is very low (ca. 1.7 %).

**Deleted:** the

**Deleted:** such that organics coated

**Deleted:** preferentially react

**Deleted:** Indeed

**Deleted:** negative (-0.21),

**Deleted:** the thermodynamic equilibrium between  $\text{NH}_3(\text{g})$  and nitrogen in particles was minimal or replaced by

**Deleted:** this

**Deleted:** Ammonia measurements directly at the Košetice site were carried out until 2001, and they showed that the  $\text{NH}_3$  concentrations in summer and winter were comparable ([http://portal.chmi.cz/files/portal/docs/uoco/isko/tab\\_roc/2000\\_enh/CZE/kap\\_18/kap\\_18\\_026.html](http://portal.chmi.cz/files/portal/docs/uoco/isko/tab_roc/2000_enh/CZE/kap_18/kap_18_026.html)), which indirectly support the above hypothesis.

**Deleted:** The summer

**Deleted:** carbon isotope enrichment.

**Deleted:** the

**Deleted:** winter

**Deleted:** points to the evolution of

**Deleted:** contents of  $^{13}\text{C}$

**Deleted:** lower temperatures

**Deleted:** This result is probably connected with different carbonaceous aerosols during winter (anthropogenic emissions from coal, wood and biomass burning with the enrichment of  $^{13}\text{C}$ ) in comparison with the summer season (primary biogenic and secondary organic aerosols with lower  $\delta^{13}\text{C}$ ).

**Deleted:** source is

948 domestic heating and transportation, are significant ( $r=0.61-0.88$ ) only during the heating season  
949 (autumn–spring, see Table 3), while in summer, the correlation is statistically insignificant (0.28). Thus,  
950 the isotopic composition of aerosol carbon at the Koštice station is not significantly influenced by EC  
951 emitted from transportation; otherwise the year-round correlation between  $\delta^{13}\text{C}$  and EC would suggest  
952 that transportation is significant source of EC in summer. This result can be biased by the fact that EC  
953 constitutes on average 19% of TC during all seasons. However, it is consistent with positive correlations  
954 between  $\delta^{13}\text{C}$  and gaseous  $\text{NO}_2$ , as well as particulate nitrate, which is also significant in autumn to  
955 spring. This result is also supported by the negative correlation of  $\delta^{13}\text{C}$  with the EC/TC ratio ( $r=-0.51$ ),  
956 which is significant only in summer.

Deleted: ,

Deleted: ,

Deleted: also be

Deleted: This result

Deleted: from

Deleted: , and this

957  
958 It should be mentioned that the wind directions during the campaign were similar, with the exception  
959 of winter season, when southeast (SE) winds prevailed (see Fig. S4 in SI). We did not observe any  
960 specific dependence of isotopic values on wind directions, except for the *Event*.

Deleted: the

### 961 3.4. Winter Event

962  
963 The winter *Event* represents the period from January 23 to February 5, 2014, when an enrichment of  
964  $^{13}\text{C}$  and substantial depletion of  $^{15}\text{N}$  occurred in PM1 (see Figs. 1 and 9 for details). We do not observe  
965 any trends of the isotopic compositions of  $\delta^{15}\text{N}$  and  $\delta^{13}\text{C}$  with wind directions, except for the period of  
966 the *Event* and one single measurement on December 18, 2013. Both the *Event* and the single  
967 measurement are connected to SE winds through Vienna and the Balkan Peninsula (Fig. 10). More  
968 elevated wind speeds with very stable SE winds are observed on the site with samples showing the most  
969  $^{15}\text{N}$  depleted values at the end of the *Event* (Fig. 9). Stable weather conditions and the homogeneity of  
970 the results indicate a local or regional source, which is probably associated with the formation of sulfates  
971 (Fig. S5).

Deleted: ¶  
¶  
¶

Deleted: a

Deleted: between

Deleted: and

Deleted: 18<sup>th</sup>

972  
973 Although the *Event* contains only 7 samples, high correlations are obtained for  $\delta^{15}\text{N}$  and  $\delta^{13}\text{C}$  (Tables 2  
974 and 3). Generally, correlations of  $\delta^{15}\text{N}$  with several parameters during the *Event* are opposite to those  
975 of four seasons, indicating the exceptional nature of these aerosols from a chemical point of view.  
976 During the *Event*,  $\delta^{15}\text{N}$  correlates positively with  $\text{NO}_3^-$  ( $r=0.96$ ) and  $\text{NO}_3^-/\text{TN}$  (0.98). Before the *Event*,  
977 we also observed the highest values of  $\delta^{15}\text{N}$  at approximately 13.3‰, which we previously interpreted  
978 as an influence of the emissions from domestic heating via coal and/or biomass burning. Positive  
979 correlations of  $\delta^{13}\text{C}$  with oxalate and potassium (both 0.93) and the negative correlation with  
980 temperature (-0.79) also suggest that the *Event* is associated with fresh emissions from burning sources.

Deleted: emissions

Deleted: ), which are not sufficiently mixed at this time.

Deleted: the

Deleted: ), with large

Deleted: 14

Deleted: by

Deleted: show

Deleted: combustion

Deleted: ‰)

Deleted: the

Deleted: total

981  
982 In contrast, we find that most  $\delta^{15}\text{N}$  values with a depletion of  $^{15}\text{N}$  are associated with enhanced  $\text{NH}_4^+$   
983 contents (70-80 % of TN) and almost absence of  $\text{NO}_3^-$  nitrogen (see Figs. 3 and 4). Although some

1009 content of OrgN is detected during the *Event* (Fig. 3), the correlation between  $\delta^{15}\text{N}$  and OrgN/TN is not  
 1010 significant (Table 2). This result ~~suggests~~ that nitrogen with the lowest  $\delta^{15}\text{N}$  values is mainly connected  
 1011 with  $\text{NH}_4^+$ , which is supported by a strong negative correlation between  $\delta^{15}\text{N}$  and  $\text{NH}_4^+/\text{TN}$  (-0.86).  
 1012 Assuming that nitrogen in particles mainly originates from gaseous nitrogen precursors via gas-to-  
 1013 particle conversion (e.g., Wang et al., 2017) during the *Event*, we ~~could~~ expect the nitrogen ~~originated~~  
 1014 mainly from  $\text{NH}_3$  with depleted  $^{15}\text{N}$  but not nitrogen oxides. Agricultural emissions from both fertilizer  
 1015 application and animal waste are ~~important~~ sources of  $\text{NH}_3$  (Felix et al., 2013). Considering possible  
 1016 agriculture emission sources, there exist several collective farms, with both livestock (mainly cows,  
 1017 ~~Holstein~~ cattle) and crop production in the SE direction from the Košetice observatory – namely,  
 1018 Agropodnik Košetice (3.4 km ~~away~~), Agrodám Hořepník (6.8 km) and Agrorev Červená Řečice (9.5  
 1019 km). Skipitytè et al. (2016) reported lower  $\delta^{15}\text{N}$  values of TN (+1 to +6‰) for agriculture-derived  
 1020 particulate matter of poultry farms, which are close to our values obtained during the *Event* (Fig. 9).

Deleted: shows

Deleted: should

Deleted: to originate

Deleted: such

Deleted: emissions

Deleted: Holsteins

Deleted: in

Deleted: distance

Deleted: .

1022 The  $\delta^{15}\text{N}$  values from the *Event* are associated with an average temperature of below  $0^\circ\text{C}$  (Figs. 7 and  
 1023 9). Savard et al. (2017) observed the lowest values of  $\delta^{15}\text{N}$  ~~of~~  $\text{NH}_3$  with temperatures below  $-5^\circ\text{C}$ , and  
 1024 the  $\text{NH}_4^+$  particles that were simultaneously sampled were also isotopically lighter compared to the  
 1025 samples collected under higher temperature conditions. ~~They interpreted the result as a preferential dry~~  
 1026 ~~deposition of heavier isotopic  $^{15}\text{NH}_3$  species during the cold period, whereas lighter  $^{14}\text{NH}_3$  species~~  
 1027 ~~preferentially remains in the atmosphere. However, cold weather can also lead to a decline of ammonia~~  
 1028 ~~fluxes from aerosol water surfaces, soil, etc. (Roelle and Aneja, 2002), which generally result in a deficit~~  
 1029 ~~of ammonia in the atmosphere. Emissions from farms are not as limited by low temperature and are~~  
 1030 ~~thus a main source of ammonia in this deficiency state. The removal of  $\text{NH}_3$  leads to a non-equilibrium~~  
 1031 ~~state between the gas and aerosol phases.~~ Such an absence of equilibrium exchange of  $\text{NH}_3$  between the  
 1032 gas and liquid/solid phases is ~~considered to cause the~~  $\text{NH}_4^+/\text{SO}_4^{2-}$  molar ~~ratios~~ below 2 for the three  
 1033 most  $^{15}\text{N}$  depleted samples (Fig. 8). ~~However, under such conditions, nitrate partitioning in PM is~~  
 1034 ~~negligible. It should be mentioned, that a deficiency of ammonia in atmosphere during the winter Event~~  
 1035 ~~leads to completely opposite  $\delta^{15}\text{N}$  values than in summer (see section 3.3) even if molar ratios~~  
 1036  ~~$\text{NH}_4^+/\text{SO}_4^{2-}$  are below 2 in both cases.~~

Deleted: in

Deleted: They interpreted this result as the preferential dry deposition of heavier isotopic  $^{15}\text{NH}_3$  species during the cold period, whereas the remaining lighter  $^{14}\text{NH}_3$  species in the atmosphere, lead to lighter  $\text{NH}_4^+$  in particles. Moreover, the removal of  $\text{NH}_3$  by dry deposition also leads to a non-equilibrium state between the gas and aerosol phases.

Deleted: supported by a

Deleted: ratio

Deleted: In

1038 ~~Unidirectional~~ reactions of ~~isotopically~~ lighter  $\text{NH}_3$  with  $\text{H}_2\text{SO}_4$  in the atmosphere are strongly preferred  
 1039 ~~by~~ the kinetic isotope effect, which is, ~~after several minutes,~~ followed by enrichment of  ~~$^{14}\text{NH}_3$~~  due to  
 1040 the newly established equilibrium (Heaton et al., 1997). Based on laboratory experiments, Heaton et al.  
 1041 (1997) estimated the isotopic enrichment factor between gas  $\text{NH}_3$  and particle  $\text{NH}_4^+$ ,  $\epsilon_{\text{NH}_4-\text{NH}_3}$ , to be  
 1042 +33‰. Savard et al. (2017) reported an isotopic difference ( $\Delta\delta^{15}\text{N}$ ) between  $\text{NH}_3$  (g) and particulate  
 1043  $\text{NH}_4^+$  as a function of temperature, whereas  $\Delta\delta^{15}\text{N}$  for a temperature of approximately  $0^\circ\text{C}$  was  
 1044 approximately 40‰. In both cases, after subtraction of these values (33 or 40‰) from the  $\delta^{15}\text{N}$  values  
 1045 of the measured *Event*, we obtain values ~~from~~ approximately -40 to -28‰, which are in a range of  $\delta^{15}\text{N}$ -

Deleted: , and unidirectional

Deleted: isotope

Deleted: due to

Deleted: (

Deleted: )

Deleted: the nitrogen

Deleted: between

1072 NH<sub>3</sub> (g) measured for agricultural emissions. These values are especially in good agreement with δ<sup>15</sup>N  
1073 of NH<sub>3</sub> derived from cow waste (ca. -38 to -22‰, Felix et al., 2013).

1074  
1075 Thus, ~~during the course~~ of the ~~winter Event~~, we probably ~~observed~~ PM representing a mixture of  
1076 aerosols from household heating characterized by higher amounts of NO<sub>3</sub><sup>-</sup> and ~~low value (8.2‰) of~~  
1077 ~~δ<sup>15</sup>N of TN~~, which are gradually replaced by <sup>15</sup>N-depleted agricultural aerosols. ~~The~~ whole process  
1078 ~~occurred under low temperature conditions~~ that ~~was first initiated by a deficiency~~ of NH<sub>3</sub> followed by  
1079 ~~an unidirectional (kinetic) reaction of isotopically lighter NH<sub>3</sub>(g) → NH<sub>4</sub><sup>+</sup>(p), in which NH<sub>3</sub> is mainly~~  
1080 ~~originated~~ from agricultural sources ~~SE of~~ the Košetice station.

1081  
1082 If the four lowest values of δ<sup>15</sup>N mainly represent agricultural aerosols, then ~~it can be suggested that~~ the  
1083 δ<sup>13</sup>C values from the same samples should ~~originate from same~~ sources. ~~During the winter Event~~, the  
1084 δ<sup>13</sup>C values ranging from -26.2 to -25.4‰ belong to the most <sup>13</sup>C enriched fine aerosols at the Košetice  
1085 site. However, similar δ<sup>13</sup>C values were reported by Widory (2006) for particles from coal combustion  
1086 (-25.6 to -24.6‰). Skipitytė et al. (2016) reported a mean value of δ<sup>13</sup>C ~~of TC~~ (-23.7±1.3‰) for PM1  
1087 particles collected on a poultry farm, and ~~suggested the litter as a possible source for the particles. Thus,~~  
1088 ~~in the case of δ<sup>13</sup>C values that we observed~~ during the ~~winter Event~~ ~~are probably caused by~~ emissions  
1089 ~~from domestic heating than from~~ agricultural sources. ~~This is also supported by increased emissions of~~  
1090 ~~SO<sub>2</sub> from coal combustion to formation of sulfates~~.

#### 1091 4. Summary and Conclusions

1092  
1093 Based on the analysis of year-round data of stable carbon and nitrogen isotopes, we extracted important  
1094 information on the processes taking place in fine aerosols during different seasons at the Central  
1095 European station of Košetice. Seasonal variations were observed for δ<sup>13</sup>C and δ<sup>15</sup>N, as well as for TC  
1096 and TN ~~concentrations~~. The supporting data (i.e., ions, EC/OC, meteorology, trace gases) revealed  
1097 characteristic processes that led to changes in the isotopic compositions on the site.

1098 The main and gradual changes in nitrogen isotopic composition occurred in spring. During early spring,  
1099 domestic heating with wood stoves is still common, with high nitrate concentrations in aerosols, which  
1100 decreased toward the end of spring. Additionally, ~~the~~ temperature slowly increases, and the overall  
1101 situation leads to thermodynamic equilibrium exchange between gas (~~NO<sub>x</sub>-NH<sub>3</sub>-SO<sub>2</sub> mixture~~) and  
1102 aerosol (NO<sub>3</sub><sup>-</sup> - NH<sub>4</sub><sup>+</sup> - SO<sub>4</sub><sup>2-</sup> mixture) phases, which causes ~~an enrichment of <sup>15</sup>N~~ in aerosols. Enrichment  
1103 of <sup>15</sup>N (Δδ<sup>15</sup>N) from the beginning to the end of spring was approximately +10‰. Gradual springtime  
1104 changes in isotopic composition were also observed for δ<sup>13</sup>C, but the depletion was small, and Δδ<sup>13</sup>C  
1105 was only -1.4‰.

1106

- Deleted: in case
- Deleted: observe
- Deleted: in
- Deleted: (ca. 14‰),
- Deleted: Results of the
- Deleted: from low temperatures
- Deleted: support dry deposition
- Deleted: isotope
- Deleted: ) originate
- Deleted: in the
- Deleted: direction from
- Deleted: also be characteristic of agricultural
- Deleted: In this case,
- Deleted: in
- Deleted: they
- Deleted: we observed,
- Deleted: either
- Deleted: and/or
- Deleted: are responsible for the <sup>13</sup>C values.¶

- Deleted: some

- Deleted: ,
- Deleted: NO<sub>3</sub>
- Deleted: <sup>15</sup>N

1130 In summer, we observed the lowest concentrations of TC and TN; however, there was an enhanced  
 1131 enrichment of  $^{15}\text{N}$ , which was probably caused by the aging of nitrogenous aerosols, where ammonium  
 1132 sulfate and bisulfate is subjected to isotopic fractionation via equilibrium exchange between  $\text{NH}_3(\text{g})$   
 1133 and  $\text{NH}_4^+(\text{p})$  when  $\text{NH}_4^+/\text{SO}_4^{2-}$  molar ratio was less than 2. However, summer values of  $\delta^{15}\text{N}$  were still  
 1134 among the highest compared with those in previous studies, which can be explained by several factors.  
 1135 First, a fine aerosol fraction (PM1) is more reactive, and its residence time in the atmosphere is longer  
 1136 than coarse mode particles, leading to  $^{15}\text{N}$  enrichment in aged aerosols. Second, summer aerosols,  
 1137 compared to other seasons, contain a negligible amount of nitrate, contributing to a decrease in the  
 1138 average value of  $\delta^{15}\text{N}$  of TN. Although the summer  $\delta^{15}\text{N}$  values were the highest further  $^{15}\text{N}$  enrichment  
 1139 was minimized at this season. On the other hand, we observed an enrichment of  $^{13}\text{C}$  only in summer,  
 1140 which can be explained by the photooxidation processes of organics and is supported by the positive  
 1141 correlation of  $\delta^{13}\text{C}$  with temperature and ozone. Despite this slow enrichment process, summertime  
 1142  $\delta^{13}\text{C}$  values were the lowest compared to those in other seasons and referred predominantly to organic  
 1143 aerosols of biogenic origin.

**Deleted:** nitrogen

**Deleted:** ). Based on a

**Deleted:** of

**Deleted:** , we concluded that summer aerosols become more acidic, and thus, kinetic isotopic fractionation took place via the equilibrium exchange of nitrogen species

1145 In winter, we found the highest concentrations of TC and TN. Lower winter  $\delta^{15}\text{N}$  values were apparently  
 1146 influenced by fresh aerosols from combustion, which were strongly driven by the amount of nitrates  
 1147 (mainly  $\text{NH}_4\text{NO}_3$  in PM1), and led to an average winter value ( $13.3 \pm 0.7\%$ ) of  $\delta^{15}\text{N}$  of TN. Winter  $\delta^{13}\text{C}$   
 1148 values were more enriched than summer values, which are involved with the emissions from biomass  
 1149 and coal burning for domestic heating.

**Deleted:** The role of organics in summer may also have an effect on the aforementioned  $^{15}\text{N}$  enrichment due to thermodynamic equilibrium.

**Deleted:** approximately 14%.

**Deleted:** and they were connected mainly to

**Deleted:** coal and (mostly)

1151 We observed an aerosol event in winter, which was characterized by low temperatures below the  
 1152 freezing point, stable southeast winds, and a unique isotope signature with a depletion of  $^{15}\text{N}$  and  
 1153 enrichment of  $^{13}\text{C}$ . The winter *Event* characterized by  $^{15}\text{N}$  depletion was probably caused by preferential  
 1154 unidirectional reactions between isotopically light ammonia, originated mainly from agriculture  
 1155 emissions, and sulfuric acid, resulting in  $(\text{NH}_4)_2\text{SO}_4$  and  $\text{NH}_4\text{HSO}_4$ . This process was probably  
 1156 supported by long-term cold weather leading to a deficiency of ammonia in the atmosphere (due to dry  
 1157 deposition and/or low fluxes), and subsequent suppression of nitrate to partitioning in aerosol.  
 1158 The majority of yearly data showed a strong correlation between  $\delta^{15}\text{N}$  and ambient temperature,  
 1159 demonstrating an enrichment of  $^{15}\text{N}$  via isotopic equilibrium exchange between the gas and particulate  
 1160 phases. This process seemed to be one of the main mechanisms for  $^{15}\text{N}$  enrichment at the Košetice site,  
 1161 especially during spring. The most  $^{15}\text{N}$ -enriched summer and most  $^{15}\text{N}$ -depleted winter samples were  
 1162 limited for the partitioning of nitrate between gas and aerosols.

**Deleted:** the dry deposition of  $\text{NH}_3$  (with heavier isotope) during cold weather, and with decreasing concentrations of  $\text{NO}_3^-$ . However, it was completely opposite to a summertime decrease in nitrate, which led to an enrichment of  $^{15}\text{N}$ . In the case of the most depleted  $^{15}\text{N}$  event, nitrate was suppressed to partition in aerosol and gas phases with

**Deleted:** of

**Deleted:** and sulfuric acid resulting in  $(\text{NH}_4)_2\text{SO}_4$ , which

**Deleted:** in this case

**Deleted:** ¶

**Deleted:** the

**Deleted:** by

**Deleted:** in aerosols and suppressed equilibrium exchange

**Deleted:** gaseous  $\text{NH}_3$

**Deleted:** aerosol  $\text{NH}_4^+$ .

**Deleted:** In the case of carbon, the

**Deleted:** cycle of

**Deleted:** values

**Deleted:** , and because

1164 This study revealed a picture of the seasonal cycle of  $\delta^{15}\text{N}$  in aerosol TN at the Košetice site. The  
 1165 seasonal  $\delta^{13}\text{C}$  cycle was not so pronounced because they mainly depend on the isotopic composition of  
 1166 primary sources, which often overlapped. Although photochemical secondary oxidation reactions are

1198 driven by the kinetic isotopic effect, the phase transfer probably did not play a crucial role in the case  
1199 of carbon at the Central European site.

Deleted: were influenced

Deleted: while

1200

## 1201 Acknowledgements

1202

1203 This study was supported by funding from the Japan Society for the Promotion of Science (JSPS)  
1204 through Grant-in-Aid No. 24221001, from the Ministry of Education, Youth and Sports of the Czech  
1205 Republic under the project no. LM2015037 and under the grant ACTRIS-CZ RI  
1206 (CZ.02.1.01/0.0/0.0/16\_013/0001315). We also thank the Czech Hydrometeorological Institute for  
1207 providing its meteorological data and Dr. Milan Váňa and his colleagues from the Košetice Observatory  
1208 for their valuable cooperation during the collection of samples. We appreciate the financial support of  
1209 the JSPS fellowship to P. Vodička (P16760).

1210

## 1211 References:

1212

1213 Aggarwal, S. G., Kawamura, K., Umarji, G. S., Tachibana, E., Patil, R. S. and Gupta, P. K.: Organic  
1214 and inorganic markers and stable C-, N-isotopic compositions of tropical coastal aerosols from  
1215 megacity Mumbai: Sources of organic aerosols and atmospheric processing, *Atmos. Chem. Phys.*,  
1216 13(9), 4667–4680, doi:10.5194/acp-13-4667-2013, 2013.

1217 Agnihotri, R., Mandal, T. K., Karapurkar, S. G., Naja, M., Gadi, R., Ahammed, Y. N., Kumar, A.,  
1218 Saud, T. and Saxena, M.: Stable carbon and nitrogen isotopic composition of bulk aerosols over India  
1219 and northern Indian Ocean, *Atmos. Environ.*, 45(17), 2828–2835,  
1220 doi:10.1016/j.atmosenv.2011.03.003, 2011.

1221 Ancelet, T., Davy, P. K., Trompeter, W. J., Markwitz, A. and Weatherburn, D. C.: Carbonaceous  
1222 aerosols in an urban tunnel, *Atmos. Environ.*, 45(26), 4463–4469,  
1223 doi:10.1016/j.atmosenv.2011.05.032, 2011.

1224 Beyn, F., Matthias, V., Auling, A. and Dähnke, K.: Do N-isotopes in atmospheric nitrate deposition  
1225 reflect air pollution levels?, *Atmos. Environ.*, 107, 281–288, doi:10.1016/j.atmosenv.2015.02.057,  
1226 2015.

1227 Bikkina, S., Kawamura, K. and Sarin, M.: Stable carbon and nitrogen isotopic composition of fine  
1228 mode aerosols (PM<sub>2.5</sub>) over the Bay of Bengal: impact of continental sources, *Tellus B Chem. Phys.*  
1229 *Meteorol.*, 68(1), 31518, doi:10.3402/tellusb.v68.31518, 2016.

1230 Boreddy, S. K. R., Parvin, F., Kawamura, K., Zhu, C. and Lee, C. Te: Stable carbon and nitrogen  
1231 isotopic compositions of fine aerosols (PM<sub>2.5</sub>) during an intensive biomass burning over Southeast  
1232 Asia: Influence of SOA and aging, *Atmos. Environ.*, 191(August), 478–489,  
1233 doi:10.1016/j.atmosenv.2018.08.034, 2018.

1234 Cachier, H.: Isotopic characterization of carbonaceous aerosols, *Aerosol Sci. Technol.*, 10(2), 379–  
1235 385, doi:10.1080/02786828908959276, 1989.

1236 Cavalli, F., Viana, M., Yttri, K. E., Genberg, J. and Putaud, J.-P.: Toward a standardised thermal-  
1237 optical protocol for measuring atmospheric organic and elemental carbon: the EUSAAR protocol,  
1238 *Atmos. Meas. Tech.*, 3(1), 79–89, doi:10.5194/amt-3-79-2010, 2010.

1239 Ceburnis, D., Masalaite, A., Ovadnevaite, J., Garbaras, A., Remeikis, V., Maenhaut, W., Claeys, M.,  
1240 Sciare, J., Baisnée, D. and O'Dowd, C. D.: Stable isotopes measurements reveal dual carbon pools

- 1243 contributing to organic matter enrichment in marine aerosol, *Sci. Rep.*, 6(July), 1–6,  
1244 doi:10.1038/srep36675, 2016.
- 1245 Cieżka, M., Modelska, M., Górka, M., Trojanowska-Olichwer, A. and Widory, D.: Chemical and  
1246 isotopic interpretation of major ion compositions from precipitation: A one-year temporal monitoring  
1247 study in Wrocław, SW Poland, *J. Atmos. Chem.*, 73, 61–80, doi:10.1007/s10874-015-9316-2, 2016.
- 1248 Dean, J. R., Leng, M. J. and Mackay, A. W.: Is there an isotopic signature of the Anthropocene?,  
1249 *Anthr. Rev.*, 1(3), 276–287, doi:10.1177/2053019614541631, 2014.
- 1250 Felix, D. J., Elliott, E. M., Gish, T. J., McConnell, L. L. and Shaw, S. L.: Characterizing the isotopic  
1251 composition of atmospheric ammonia emission sources using passive samplers and a combined  
1252 oxidation-bacterial denitrifier approach, *Rapid Commun. Mass Spectrom.*, 27(20), 2239–2246,  
1253 doi:10.1002/rcm.6679, 2013.
- 1254 Felix, J. D., Elliott, E. M. and Shaw, S. L.: Nitrogen isotopic composition of coal-fired power plant  
1255 NO<sub>x</sub>: Influence of emission controls and implications for global emission inventories, *Environ. Sci.*  
1256 *Technol.*, 46(6), 3528–3535, doi:10.1021/es203355v, 2012.
- 1257 Fisseha, R., Saurer, M., Jäggi, M., Siegwolf, R. T. W., Dommen, J., Szidat, S., Samburova, V. and  
1258 Baltensperger, U.: Determination of primary and secondary sources of organic acids and  
1259 carbonaceous aerosols using stable carbon isotopes, *Atmos. Environ.*, 43(2), 431–437,  
1260 doi:10.1016/j.atmosenv.2008.08.041, 2009a.
- 1261 Fisseha, R., Spahn, H., Wegener, R., Hohaus, T., Brasse, G., Wissel, H., Tillmann, R., Wahner, A.,  
1262 Koppmann, R. and Kiendler-Scharr, A.: Stable carbon isotope composition of secondary organic  
1263 aerosol from  $\beta$ -pinene oxidation, *J. Geophys. Res.*, 114(D2), D02304, doi:10.1029/2008JD011326,  
1264 2009b.
- 1265 Freyer, H. D.: Seasonal variation of <sup>15</sup>N/<sup>14</sup>N ratios in atmospheric nitrate species, *Tellus B*, 43(1),  
1266 30–44, doi:10.1034/j.1600-0889.1991.00003.x, 1991.
- 1267 Freyer, H. D., Kley, D., Volz-Thomas, A. and Kobel, K.: On the interaction of isotopic exchange  
1268 processes with photochemical reactions in atmospheric oxides of nitrogen, *J. Geophys. Res.*, 98(D8),  
1269 14791–14796, doi:10.1029/93JD00874, 1993.
- 1270 Fuzzi, S., Baltensperger, U., Carslaw, K., Decesari, S., Denier Van Der Gon, H., Facchini, M. C.,  
1271 Fowler, D., Koren, I., Langford, B., Lohmann, U., Nemitz, E., Pandis, S., Riipinen, I., Rudich, Y.,  
1272 Schaap, M., Slowik, J. G., Spracklen, D. V., Vignati, E., Wild, M., Williams, M. and Gilardoni, S.:  
1273 Particulate matter, air quality and climate: Lessons learned and future needs, *Atmos. Chem. Phys.*,  
1274 15(14), 8217–8299, doi:10.5194/acp-15-8217-2015, 2015.
- 1275 Gensch, I., Kiendler-Scharr, A. and Rudolph, J.: Isotope ratio studies of atmospheric organic  
1276 compounds: Principles, methods, applications and potential, *Int. J. Mass Spectrom.*, 365–366, 206–  
1277 221, doi:10.1016/j.ijms.2014.02.004, 2014.
- 1278 Górka, M., Rybicki, M., Simoneit, B. R. T. and Marynowski, L.: Determination of multiple organic  
1279 matter sources in aerosol PM<sub>10</sub> from Wrocław, Poland using molecular and stable carbon isotope  
1280 compositions, *Atmos. Environ.*, 89, 739–748, doi:10.1016/j.atmosenv.2014.02.064, 2014.
- 1281 Harrison, R. M. and Pio, C. A.: Size-differentiated composition of inorganic atmospheric aerosols of  
1282 both marine and polluted continental origin, *Atmos. Environ.*, 17(9), 1733–1738, doi:10.1016/0004-  
1283 6981(83)90180-4, 1983.
- 1284 Heaton, T. H. E.: <sup>15</sup>N/<sup>14</sup>N ratios of NO<sub>x</sub> from vehicle engines and coal-fired power stations, *Tellus*  
1285 *B*, 42, 304–307, 1990.
- 1286 Heaton, T. H. E., Spiro, B. and Robertson, S. M. C.: Potential canopy influences on the isotopic  
1287 composition of nitrogen and sulphur in atmospheric deposition, *Oecologia*, (109), 600–607, 1997.

- 1288 Hyslop, N. P.: Impaired visibility: the air pollution people see, *Atmos. Environ.*, 43(1), 182–195,  
1289 doi:10.1016/j.atmosenv.2008.09.067, 2009.
- 1290 Irei, S., Huang, L., Collin, F., Zhang, W., Hastie, D. and Rudolph, J.: Flow reactor studies of the  
1291 stable carbon isotope composition of secondary particulate organic matter generated by OH-radical-  
1292 induced reactions of toluene, *Atmos. Environ.*, 40(30), 5858–5867,  
1293 doi:10.1016/j.atmosenv.2006.05.001, 2006.
- 1294 Jickells, T., Baker, A. R., Cape, J. N., Cornell, S. E. and Nemitz, E.: The cycling of organic nitrogen  
1295 through the atmosphere., *Philos. Trans. R. Soc. Lond. B. Biol. Sci.*, 368(1621), 20130115,  
1296 doi:10.1098/rstb.2013.0115, 2013.
- 1297 Kawamura, K., Kobayashi, M., Tsubonuma, N., Mochida, M., Watanabe, T. and Lee, M.: Organic  
1298 and inorganic compositions of marine aerosols from East Asia: Seasonal variations of water-soluble  
1299 dicarboxylic acids, major ions, total carbon and nitrogen, and stable C and N isotopic composition,  
1300 *Geochemical Soc. Spec. Publ.*, 9(C), 243–265, doi:10.1016/S1873-9881(04)80019-1, 2004.
- 1301 Kawashima, H. and Haneishi, Y.: Effects of combustion emissions from the Eurasian continent in  
1302 winter on seasonal  $\delta^{13}\text{C}$  of elemental carbon in aerosols in Japan, *Atmos. Environ.*, 46, 568–579,  
1303 doi:10.1016/j.atmosenv.2011.05.015, 2012.
- 1304 Kawashima, H. and Kurahashi, T.: Inorganic ion and nitrogen isotopic compositions of atmospheric  
1305 aerosols at Yurihonjo, Japan: Implications for nitrogen sources, *Atmos. Environ.*, 45(35), 6309–6316,  
1306 doi:10.1016/j.atmosenv.2011.08.057, 2011.
- 1307 Kundu, S., Kawamura, K. and Lee, M.: Seasonal variation of the concentrations of nitrogenous  
1308 species and their nitrogen isotopic ratios in aerosols at Gosan, Jeju Island: Implications for  
1309 atmospheric processing and source changes of aerosols, *J. Geophys. Res. Atmos.*, 115(20), 1–19,  
1310 doi:10.1029/2009JD013323, 2010.
- 1311 Kunwar, B., Kawamura, K. and Zhu, C.: Stable carbon and nitrogen isotopic compositions of ambient  
1312 aerosols collected from Okinawa Island in the western North Pacific Rim, an outflow region of Asian  
1313 dusts and pollutants, *Atmos. Environ.*, 131, 243–253, doi:10.1016/j.atmosenv.2016.01.035, 2016.
- 1314 Li, D. and Wang, X.: Nitrogen isotopic signature of soil-released nitric oxide (NO) after fertilizer  
1315 application, *Atmos. Environ.*, 42(19), 4747–4754, doi:10.1016/j.atmosenv.2008.01.042, 2008.
- 1316 Liggio, J., Li, S. M., Vlasenko, A., Stroud, C. and Makar, P.: Depression of ammonia uptake to  
1317 sulfuric acid aerosols by competing uptake of ambient organic gases, *Environ. Sci. Technol.*, 45(7),  
1318 2790–2796, doi:10.1021/es103801g, 2011.
- 1319 Martinelli, L. A., Camargo, P. B., Lara, L. B. L. S., Victoria, R. L. and Artaxo, P.: Stable carbon and  
1320 nitrogen isotopic composition of bulk aerosol particles in a C4 plant landscape of southeast Brazil,  
1321 *Atmos. Environ.*, 36(14), 2427–2432, doi:10.1016/S1352-2310(01)00454-X, 2002.
- 1322 Martinsson, J., Andersson, A., Sporre, M. K., Friberg, J., Kristensson, A., Swietlicki, E., Olsson, P. A.  
1323 and Stenström, K. E.: Evaluation of  $\delta^{13}\text{C}$  in carbonaceous aerosol source apportionment at a rural  
1324 measurement site, *Aerosol Air Qual. Res.*, 17, 2081–2094, doi:10.4209/aaqr.2016.09.0392, 2017.
- 1325 Masalaite, A., Remeikis, V., Garbaras, A., Dudoitis, V., Ulevicius, V. and Ceburnis, D.: Elucidating  
1326 carbonaceous aerosol sources by the stable carbon  $\delta^{13}\text{C}_{\text{TC}}$  ratio in size-segregated particles, *Atmos.  
1327 Res.*, 158–159, 1–12, doi:10.1016/j.atmosres.2015.01.014, 2015.
- 1328 Masalaite, A., Holzinger, R., Remeikis, V., Röckmann, T. and Dusek, U.: Characteristics, sources and  
1329 evolution of fine aerosol (PM1) at urban, coastal and forest background sites in Lithuania, *Atmos.  
1330 Environ.*, 148, 62–76, doi:10.1016/j.atmosenv.2016.10.038, 2017.
- 1331 Mbengue, S., Fusek, M., Schwarz, J., Vodička, P., Šmejkalová, A. H. and Holoubek, I.: Four years of  
1332 highly time resolved measurements of elemental and organic carbon at a rural background site in  
1333 Central Europe, *Atmos. Environ.*, 182, 335–346, doi:10.1016/j.atmosenv.2018.03.056, 2018.



- 1334 Meier-Augenstein, W. and Kemp, H. F.: Stable Isotope Analysis: General Principles and Limitations,  
1335 in Wiley Encyclopedia of Forensic Science, American Cancer Society., 2012.
- 1336 Miyazaki, Y., Kawamura, K., Jung, J., Furutani, H. and Uematsu, M.: Latitudinal distributions of  
1337 organic nitrogen and organic carbon in marine aerosols over the western North Pacific, *Atmos. Chem.*  
1338 *Phys.*, 11(7), 3037–3049, doi:10.5194/acp-11-3037-2011, 2011.
- 1339 Mkoma, S., Kawamura, K., Tachibana, E. and Fu, P.: Stable carbon and nitrogen isotopic  
1340 compositions of tropical atmospheric aerosols: sources and contribution from burning of C3 and C4  
1341 plants to organic aerosols, *Tellus B*, 66, 20176, doi:10.3402/tellusb.v66.20176, 2014.
- 1342 Morera-Gómez, Y., Santamaría, J. M., Elustondo, D., Alonso-Hernández, C. M. and Widory, D.:  
1343 Carbon and nitrogen isotopes unravels sources of aerosol contamination at Caribbean rural and urban  
1344 coastal sites, *Sci. Total Environ.*, 642, 723–732, doi:10.1016/j.scitotenv.2018.06.106, 2018.
- 1345 Neff, J. C., Holland, E. A., Dentener, F. J., McDowell, W. H. and Russell, K. M.: The origin,  
1346 composition and rates of organic nitrogen deposition: a missing piece of the nitrogen cycle?,  
1347 *Biogeochemistry*, 57/58, 99–136, 2002.
- 1348 Park, Y., Park, K., Kim, H., Yu, S., Noh, S., Kim, M., Kim, J., Ahn, J., Lee, M., Seok, K. and Kim,  
1349 Y.: Characterizing isotopic compositions of TC-C, NO<sub>3</sub>-N, and NH<sub>4</sub><sup>+</sup>-N in PM<sub>2.5</sub> in South Korea:  
1350 Impact of China's winter heating, *Environ. Pollut.*, 233, 735–744, doi:10.1016/j.envpol.2017.10.072,  
1351 2018.
- 1352 Pavuluri, C. M. and Kawamura, K.: Enrichment of <sup>13</sup>C in diacids and related compounds during  
1353 photochemical processing of aqueous aerosols: New proxy for organic aerosols aging, *Sci. Rep.*,  
1354 6(October), 36467, doi:10.1038/srep36467, 2016.
- 1355 Pavuluri, C. M. and Kawamura, K.: Seasonal changes in TC and WSOC and their <sup>13</sup>C isotope ratios  
1356 in Northeast Asian aerosols: land surface–biosphere–atmosphere interactions, *Acta Geochim.*, 36(3),  
1357 355–358, doi:10.1007/s11631-017-0157-3, 2017.
- 1358 Pavuluri, C. M., Kawamura, K., Tachibana, E. and Swaminathan, T.: Elevated nitrogen isotope ratios  
1359 of tropical Indian aerosols from Chennai: Implication for the origins of aerosol nitrogen in South and  
1360 Southeast Asia, *Atmos. Environ.*, 44(29), 3597–3604, doi:10.1016/j.atmosenv.2010.05.039, 2010.
- 1361 Pavuluri, C. M., Kawamura, K. and Fu, P. Q.: Atmospheric chemistry of nitrogenous aerosols in  
1362 northeastern Asia: Biological sources and secondary formation, *Atmos. Chem. Phys.*, 15(17), 9883–  
1363 9896, doi:10.5194/acp-15-9883-2015, 2015a.
- 1364 Pavuluri, C. M., Kawamura, K. and Swaminathan, T.: Time-resolved distributions of bulk parameters,  
1365 diacids, ketoacids and  $\alpha$ -dicarbonyls and stable carbon and nitrogen isotope ratios of TC and TN in  
1366 tropical Indian aerosols: Influence of land/sea breeze and secondary processes, *Atmos. Res.*, 153,  
1367 188–199, doi:10.1016/j.atmosres.2014.08.011, 2015b.
- 1368 Pichlmayer, F., Schöner, W., Seibert, P., Stichler, W. and Wagenbach, D.: Stable isotope analysis for  
1369 characterization of pollutants at high elevation alpine sites, *Atmos. Environ.*, 32(23), 4075–4085,  
1370 doi:10.1016/S1352-2310(97)00405-6, 1998.
- 1371 Pokorná, P., Schwarz, J., Krejci, R., Swietlicki, E., Havránek, V. and Ždímal, V.: Comparison of  
1372 PM<sub>2.5</sub> chemical composition and sources at a rural background site in Central Europe between  
1373 1993/1994/1995 and 2009/2010: Effect of legislative regulations and economic transformation on the  
1374 air quality, *Environ. Pollut.*, 241, 841–851, doi:10.1016/j.envpol.2018.06.015, 2018.
- 1375 Rahn, T. and Eiler, J. M.: Experimental constraints on the fractionation of C-13/C-12 and O-18/O-16  
1376 ratios due to adsorption of CO<sub>2</sub> on mineral substrates at conditions relevant to the surface of Mars,  
1377 *Geochim. Cosmochim. Acta*, 65(5), 839–846, 2001.
- 1378 Roelle, P. A. and Aneja, V. P.: Characterization of ammonia emissions from soils in the upper coastal  
1379 plain, North Carolina, *Atmos. Environ.*, 36(6), 1087–1097, doi:10.1016/S1352-2310(01)00355-7,

1380 2002.

1381 Savard, M. M., Cole, A., Smirnov, A. and Vet, R.:  $\delta^{15}\text{N}$  values of atmospheric N species  
1382 simultaneously collected using sector-based samplers distant from sources – Isotopic inheritance and  
1383 fractionation, *Atmos. Environ.*, 162, 11–22, doi:10.1016/j.atmosenv.2017.05.010, 2017.

1384 Schwarz, J., Cusack, M., Karban, J., Chalupníčková, E., Havránek, V., Smolík, J. and Ždímal, V.:  
1385 PM<sub>2.5</sub> chemical composition at a rural background site in Central Europe, including correlation and  
1386 air mass back trajectory analysis, *Atmos. Res.*, 176–177, 108–120,  
1387 doi:10.1016/j.atmosres.2016.02.017, 2016.

1388 Silvern, R. F., Jacob, D. J., Kim, P. S., Marais, E. A., Turner, J. R., Campuzano-Jost, P. and Jimenez,  
1389 J. L.: Inconsistency of ammonium-sulfate aerosol ratios with thermodynamic models in the eastern  
1390 US: A possible role of organic aerosol, *Atmos. Chem. Phys.*, 17(8), 5107–5118, doi:10.5194/acp-17-  
1391 5107-2017, 2017.

1392 Skipytytė, R., Mašalaitė, A., Garbaras, A., Mickienė, R., Ragažinskienė, O., Baliukonienė, V.,  
1393 Bakutis, B., Šiugždaitė, J., Petkevičius, S., Maruška, A. S. and Remeikis, V.: Stable isotope ratio  
1394 method for the characterisation of the poultry house environment, *Isotopes Environ. Health Stud.*,  
1395 53(3), 243–260, doi:10.1080/10256016.2016.1230609, 2016.

1396 Stein, A. F., Draxler, R. R., Rolph, G. D., Stunder, B. J. B., Cohen, M. D. and Ngan, F.: NOAA's  
1397 HYSPLIT atmospheric transport and dispersion modeling system, *Bull. Am. Meteorol. Soc.*, 96(12),  
1398 2059–2077, doi:10.1175/BAMS-D-14-00110.1, 2015.

1399 Stelson, A. W., Friedlander, S. K. and Seinfeld, J. H.: A note on the equilibrium relationship between  
1400 ammonia and nitric acid and particulate ammonium nitrate, *Atmos. Environ.*, 13(3), 369–371,  
1401 doi:10.1016/0004-6981(79)90293-2, 1979.

1402 Ti, C., Gao, B., Luo, Y., Wang, X., Wang, S. and Yan, X.: Isotopic characterization of NH<sub>x</sub>-N in  
1403 deposition and major emission sources, *Biogeochemistry*, 138(1), 85–102, doi:10.1007/s10533-018-  
1404 0432-3, 2018.

1405 Váňa, M. and Dvorská, A.: Košetice Observatory - 25 years, 1. edition., Czech Hydrometeorological  
1406 Institute, Prague., 2014.

1407 Vodička, P., Schwarz, J., Cusack, M. and Ždímal, V.: Detailed comparison of OC/EC aerosol at an  
1408 urban and a rural Czech background site during summer and winter, *Sci. Total Environ.*, 518–519(2),  
1409 424–433, doi:10.1016/j.scitotenv.2015.03.029, 2015.

1410 Walters, W. W., Simonini, D. S. and Michalski, G.: Nitrogen isotope exchange between NO and NO  
1411 2 and its implications for  $\delta^{15}\text{N}$  variations in tropospheric NO<sub>x</sub> and atmospheric nitrate, *Geophys.*  
1412 *Res. Lett.*, (2), 1–26, doi:10.1002/2015GL066438, 2015a.

1413 Walters, W. W., Goodwin, S. R. and Michalski, G.: Nitrogen stable isotope composition ( $\delta^{15}\text{N}$ ) of  
1414 vehicle-emitted NO<sub>x</sub>, *Environ. Sci. Technol.*, 49(4), 2278–2285, doi:10.1021/es505580v, 2015b.

1415 Wang, G., Xie, M., Hu, S., Gao, S., Tachibana, E. and Kawamura, K.: Dicarboxylic acids, metals and  
1416 isotopic compositions of C and N in atmospheric aerosols from inland China: Implications for dust  
1417 and coal burning emission and secondary aerosol formation, *Atmos. Chem. Phys.*, 10(13), 6087–  
1418 6096, doi:10.5194/acp-10-6087-2010, 2010.

1419 Wang, Y. L., Liu, X. Y., Song, W., Yang, W., Han, B., Dou, X. Y., Zhao, X. D., Song, Z. L., Liu, C.  
1420 Q. and Bai, Z. P.: Source appointment of nitrogen in PM<sub>2.5</sub> based on bulk  $\delta^{15}\text{N}$  signatures and a  
1421 Bayesian isotope mixing model, *Tellus, Ser. B Chem. Phys. Meteorol.*, 69(1), 1–10,  
1422 doi:10.1080/16000889.2017.1299672, 2017.

1423 Weber, R. J., Guo, H., Russell, A. G. and Nenes, A.: High aerosol acidity despite declining  
1424 atmospheric sulfate concentrations over the past 15 years, *Nat. Geosci.*, 9(4), 282–285,  
1425 doi:10.1038/ngeo2665, 2016.

1426 Widory, D.: Combustibles, fuels and their combustion products: A view through carbon isotopes,  
1427 *Combust. Theory Model.*, 10(5), 831–841, doi:10.1080/13647830600720264, 2006.

1428 Widory, D.: Nitrogen isotopes: Tracers of origin and processes affecting PM10 in the atmosphere of  
1429 Paris, *Atmos. Environ.*, 41(11), 2382–2390, doi:10.1016/j.atmosenv.2006.11.009, 2007.

1430 Widory, D., Roy, S., Le Moulec, Y., Goupil, G., Cocherie, A. and Guerrot, C.: The origin of  
1431 atmospheric particles in Paris: A view through carbon and lead isotopes, *Atmos. Environ.*, 38(7),  
1432 953–961, doi:10.1016/j.atmosenv.2003.11.001, 2004.

1433 Xiao, H.-W., Xiao, H.-Y., Luo, L., Zhang, Z.-Y., Huang, Q.-W., Sun, Q.-B. and Zeng, Z.: Stable  
1434 carbon and nitrogen isotope compositions of bulk aerosol samples over the South China Sea, *Atmos.*  
1435 *Environ.*, 193, 1–10, doi:https://doi.org/10.1016/j.atmosenv.2018.09.006, 2018.

1436 Xue, D., Botte, J., Baets, B. De, Accoe, F., Nestler, A., Taylor, P., Cleemput, O. Van, Berglund, M.  
1437 and Boeckx, P.: Present limitations and future prospects of stable isotope methods for nitrate source  
1438 identification in surface- and groundwater, *Water Res.*, 43(5), 1159–1170,  
1439 doi:https://doi.org/10.1016/j.watres.2008.12.048, 2009.

1440 Yeatman, S. G., Spokes, L. J., Dennis, P. F. and Jickells, T. D.: Can the study of nitrogen isotopic  
1441 composition in size-segregated aerosol nitrate and ammonium be used to investigate atmospheric  
1442 processing mechanisms?, *Atmos. Environ.*, 35(7), 1337–1345, doi:10.1016/S1352-2310(00)00457-X,  
1443 2001a.

1444 Yeatman, S. G., Spokes, L. J., Dennis, P. F. and Jickells, T. D.: Comparisons of aerosol nitrogen  
1445 isotopic composition at two polluted coastal sites, *Atmos. Environ.*, 35(7), 1307–1320,  
1446 doi:10.1016/S1352-2310(00)00408-8, 2001b.

1447 Zhang, Y. L., Kawamura, K., Cao, F. and Lee, M.: Stable carbon isotopic compositions of low-  
1448 molecular-weight dicarboxylic acids, oxocarboxylic acids, ??-dicarbonyls, and fatty acids:  
1449 Implications for atmospheric processing of organic aerosols, *J. Geophys. Res. Atmos.*, 121(7), 3707–  
1450 3717, doi:10.1002/2015JD024081, 2016.

1451 Zíková, N. and Ždímal, V.: Long-term measurement of aerosol number size distributions at rural  
1452 background station Košetice, *Aerosol Air Qual. Res.*, 13(5), 1464–1474,  
1453 doi:10.4209/aaqr.2013.02.0056, 2013.

1454

1455

1456

1457 Table 1: Seasonal and entire campaign averages  $\pm$  standard deviations, (medians in brackets) of  
 1458 different variables.

|                                                                 | Autumn                     | Winter                     | Spring                     | Summer                     | Year                       |
|-----------------------------------------------------------------|----------------------------|----------------------------|----------------------------|----------------------------|----------------------------|
| <b>N of samples</b>                                             | 25                         | 45                         | 43                         | 33                         | 146                        |
| <b>TC [<math>\mu\text{g m}^{-3}</math>]</b><br><b>(from EA)</b> | 3.61 $\pm$ 1.61<br>(3.30)  | 4.76 $\pm$ 2.44<br>(3.88)  | 3.78 $\pm$ 2.03<br>(3.04)  | 2.71 $\pm$ 0.76<br>(2.68)  | 3.81 $\pm$ 2.03<br>(3.35)  |
| <b>TN [<math>\mu\text{g m}^{-3}</math>]</b>                     | 1.56 $\pm$ 1.18<br>(1.33)  | 1.67 $\pm$ 0.96<br>(1.45)  | 2.00 $\pm$ 1.62<br>(1.47)  | 0.81 $\pm$ 0.29<br>(0.82)  | 1.56 $\pm$ 1.22<br>(1.26)  |
| <b><math>\delta^{13}\text{C}</math> [‰]</b>                     | -26.8 $\pm$ 0.5<br>(-26.9) | -26.7 $\pm$ 0.5<br>(-26.7) | -27.1 $\pm$ 0.5<br>(-27.0) | -27.8 $\pm$ 0.4<br>(-27.7) | -27.1 $\pm$ 0.6<br>(-27.0) |
| <b><math>\delta^{15}\text{N}</math> [‰]</b>                     | 17.1 $\pm$ 2.4<br>(16.9)   | 13.1 $\pm$ 4.5<br>(15.2)   | 17.6 $\pm$ 3.5<br>(17.3)   | 25.0 $\pm$ 1.6<br>(25.1)   | 17.8 $\pm$ 5.5<br>(16.9)   |
| <b>TC/PM1 [%]</b>                                               | 28 $\pm$ 6 (26)            | 33 $\pm$ 8 (32)            | 38 $\pm$ 15 (35)           | 31 $\pm$ 6 (30)            | 33 $\pm$ 11 (31)           |
| <b>TN/PM1 [%]</b>                                               | 11 $\pm$ 3 (11)            | 11 $\pm$ 3 (12)            | 17 $\pm$ 4 (17)            | 9 $\pm$ 2 (9)              | 12 $\pm$ 4 (12)            |
| <b>NO<sub>3</sub><sup>-</sup>-N/TN [%]</b>                      | 21 $\pm$ 6 (21)            | 25 $\pm$ 8 (28)            | 22 $\pm$ 8 (21)            | 5 $\pm$ 3 (4)              | 19 $\pm$ 10 (20)           |
| <b>NH<sub>4</sub><sup>+</sup>-N/TN [%]</b>                      | 51 $\pm$ 6 (51)            | 51 $\pm$ 9 (49)            | 58 $\pm$ 7 (60)            | 57 $\pm$ 6 (57)            | 54 $\pm$ 8 (54)            |
| <b>OrgN/TN [%]</b>                                              | 28 $\pm$ 8 (26)            | 25 $\pm$ 8 (23)            | 20 $\pm$ 8 (19)            | 39 $\pm$ 6 (38)            | 27 $\pm$ 10 (25)           |
| <b>TC/TN</b>                                                    | 2.77 $\pm$ 1.10<br>(2.60)  | 3.34 $\pm$ 1.66<br>(2.68)  | 2.33 $\pm$ 0.98<br>(2.34)  | 3.60 $\pm$ 1.23<br>(3.45)  | 3.01 $\pm$ 1.38<br>(2.61)  |

1459

1460 Table 2: Spearman correlation coefficients (r) of  $\delta^{15}\text{N}$  with various tracers. Only bold values are  
 1461 statistically significant (p-values < 0.05).

| $\delta^{15}\text{N}$ vs.              | Autumn       | Winter*      | Spring       | Summer       | Year*        | Event        |
|----------------------------------------|--------------|--------------|--------------|--------------|--------------|--------------|
| <b>TN</b>                              | -0.30        | <b>-0.40</b> | <b>-0.70</b> | <b>0.36</b>  | <b>-0.54</b> | <b>0.93</b>  |
| <b>TN/PM1</b>                          | <b>-0.63</b> | <b>-0.50</b> | -0.02        | <b>0.37</b>  | <b>-0.35</b> | 0.36         |
| <b>NO<sub>3</sub><sup>-</sup>-N/TN</b> | -0.39        | -0.04        | <b>-0.73</b> | -0.26        | <b>-0.77</b> | <b>0.98</b>  |
| <b>NH<sub>4</sub><sup>+</sup>-N/TN</b> | 0.16         | -0.30        | <b>0.60</b>  | <b>0.52</b>  | <b>0.42</b>  | <b>-0.86</b> |
| <b>OrgN/TN</b>                         | 0.20         | <b>0.38</b>  | 0.20         | -0.33        | <b>0.51</b>  | -0.71        |
| <b>NO<sub>3</sub><sup>-</sup></b>      | <b>-0.41</b> | <b>-0.35</b> | <b>-0.80</b> | -0.03        | <b>-0.78</b> | <b>0.96</b>  |
| <b>NH<sub>4</sub><sup>+</sup></b>      | -0.22        | <b>-0.42</b> | <b>-0.61</b> | <b>0.40</b>  | <b>-0.44</b> | 0.75         |
| <b>OrgN</b>                            | -0.26        | -0.27        | <b>-0.56</b> | 0.30         | <b>-0.25</b> | 0.71         |
| <b>SO<sub>4</sub><sup>2-</sup></b>     | -0.07        | <b>-0.38</b> | -0.30        | <b>0.51</b>  | 0.03         | -0.57        |
| <b>Cl<sup>-</sup></b>                  | -0.37        | -0.18        | <b>-0.74</b> | <b>-0.37</b> | <b>-0.74</b> | <b>0.99</b>  |
| <b>O<sub>3</sub> (gas)</b>             | <b>0.45</b>  | 0.14         | 0.15         | -0.02        | <b>0.40</b>  | -0.71        |
| <b>NO<sub>2</sub> (gas)</b>            | <b>-0.53</b> | <b>-0.34</b> | <b>-0.72</b> | 0.20         | <b>-0.64</b> | <b>0.86</b>  |
| <b>NO<sub>2</sub>/NO (gas)</b>         | <b>-0.51</b> | -0.26        | <b>-0.82</b> | 0.14         | <b>-0.76</b> | <b>0.82</b>  |
| <b>Temp.</b>                           | <b>0.58</b>  | 0.30         | <b>0.52</b>  | -0.21        | <b>0.77</b>  | -0.43        |

1462 \*Event data are excluded from winter and year datasets.

1463

1464

1465

1466

1467

1468 Table 3: Spearman correlation coefficients ( $r$ ) of  $\delta^{13}\text{C}$  with various tracers. Only bold values are  
 1469 statistically significant (p-values < 0.05).

| $\delta^{13}\text{C}$ vs.     | Autumn       | Winter*      | Spring       | Summer       | Year*        | Event        |
|-------------------------------|--------------|--------------|--------------|--------------|--------------|--------------|
| OC                            | <b>0.64</b>  | <b>0.63</b>  | <b>0.91</b>  | <b>0.39</b>  | <b>0.75</b>  | 0.75         |
| EC                            | <b>0.61</b>  | <b>0.74</b>  | <b>0.88</b>  | 0.28         | <b>0.84</b>  | 0.46         |
| EC/TC                         | 0.06         | 0.06         | 0.13         | <b>-0.51</b> | <b>0.32</b>  | -0.32        |
| TC/PM1                        | -0.16        | -0.05        | <b>-0.40</b> | 0.22         | -0.09        | 0.32         |
| $\text{NO}_3^-$               | <b>0.74</b>  | <b>0.52</b>  | <b>0.71</b>  | 0.12         | <b>0.76</b>  | 0.39         |
| $\text{NH}_4^+$               | <b>0.84</b>  | <b>0.59</b>  | <b>0.80</b>  | <b>0.42</b>  | <b>0.66</b>  | 0.75         |
| Oxalate                       | 0.34         | <b>0.62</b>  | <b>0.71</b>  | <b>0.65</b>  | <b>0.25</b>  | <b>0.93</b>  |
| $\text{SO}_4^{2-}$            | <b>0.80</b>  | <b>0.64</b>  | <b>0.73</b>  | <b>0.41</b>  | <b>0.34</b>  | 0.54         |
| $\text{K}^+$                  | <b>0.84</b>  | <b>0.63</b>  | <b>0.70</b>  | <b>0.47</b>  | <b>0.76</b>  | <b>0.93</b>  |
| $\text{Cl}^-$                 | <b>0.44</b>  | <b>0.62</b>  | <b>0.68</b>  | <b>0.44</b>  | <b>0.76</b>  | 0.25         |
| CO (gas)                      | 0.21         | <b>0.53</b>  | <b>0.60</b>  | 0.32         | <b>0.37</b>  | 0.68         |
| $\text{O}_3$ (gas)            | <b>-0.41</b> | -0.26        | 0.14         | <b>0.66</b>  | <b>-0.33</b> | 0.11         |
| $\text{NO}_2$ (gas)           | <b>0.67</b>  | <b>0.38</b>  | <b>0.70</b>  | 0.18         | <b>0.69</b>  | 0.32         |
| $\text{NO}_2/\text{NO}$ (gas) | <b>0.72</b>  | <b>0.65</b>  | <b>0.67</b>  | <b>0.68</b>  | <b>0.78</b>  | <b>0.96</b>  |
| Temp.                         | -0.33        | <b>-0.35</b> | -0.20        | <b>0.39</b>  | <b>-0.57</b> | <b>-0.79</b> |

1470 \*Event data are excluded from winter and year datasets.

1471

1472

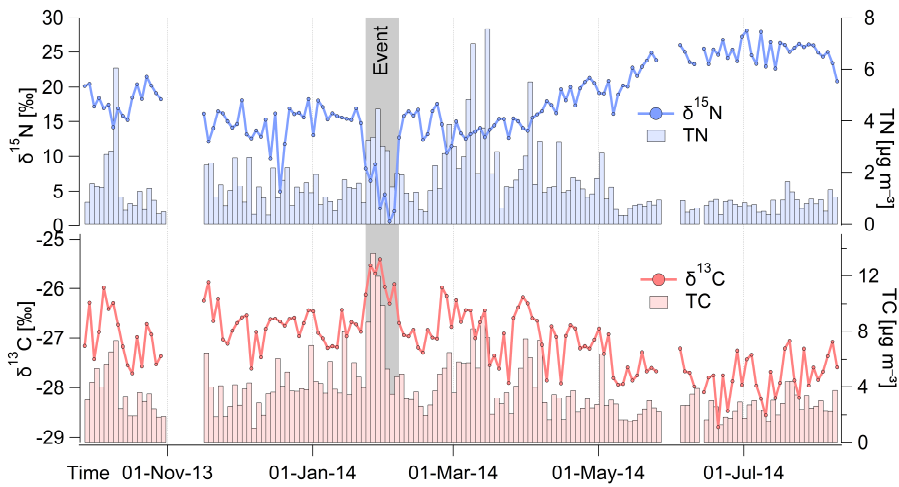

1473

1474 Fig. 1: Time series of  $\delta^{15}\text{N}$  along with TN (top) and  $\delta^{13}\text{C}$  as well as TC (bottom) in PM1 aerosols at the  
 1475 Košice station. The gray color highlights an *Event* with divergent values, especially for  $\delta^{15}\text{N}$ .

Deleted: together  
 Deleted: together with

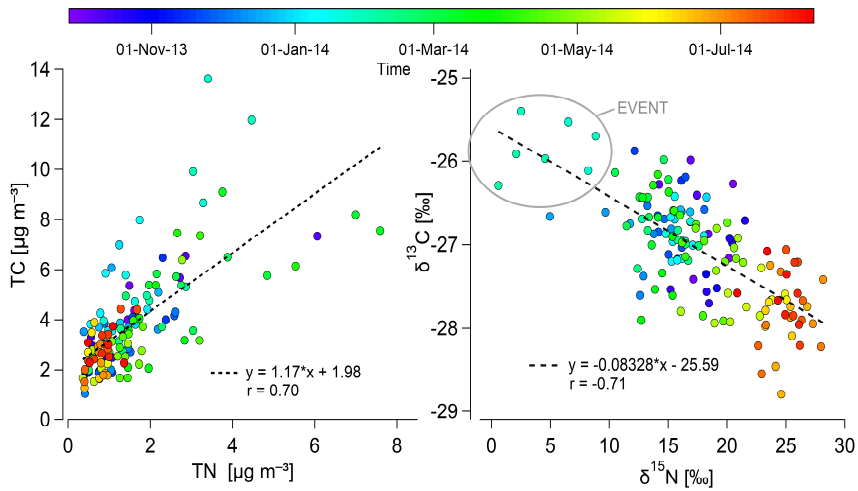

1478

1479 Fig. 2: Relationships between TC and TN (left) and their stable carbon and nitrogen isotopes (right).  
 1480 The color scale reflects the time of sample collection. The gray circle highlights the winter *Event*  
 1481 measurements.

1482

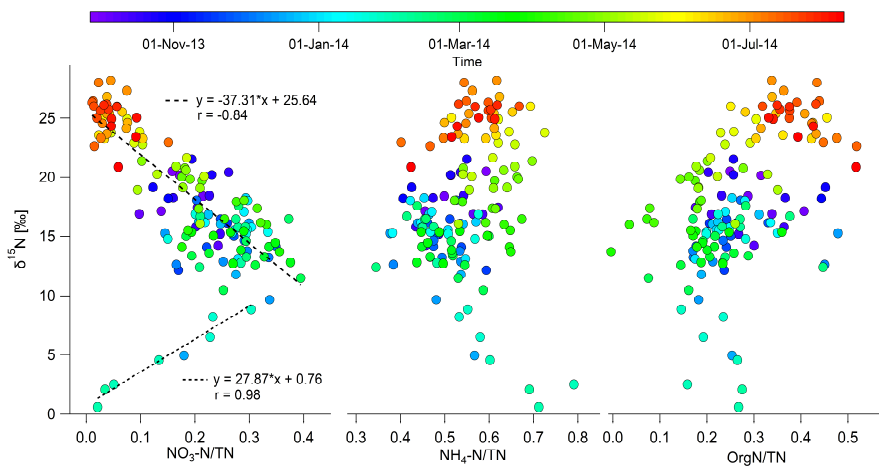

1483

1484 Fig. 3: Changes in  $\delta^{15}\text{N}$  depending on fraction of individual nitrogen components ( $\text{NO}_3\text{-N}$ ,  $\text{NH}_4\text{-N}$ , and  
 1485  $\text{OrgN}$ ) in TN. The color scale reflects the time of sample collection.

1486

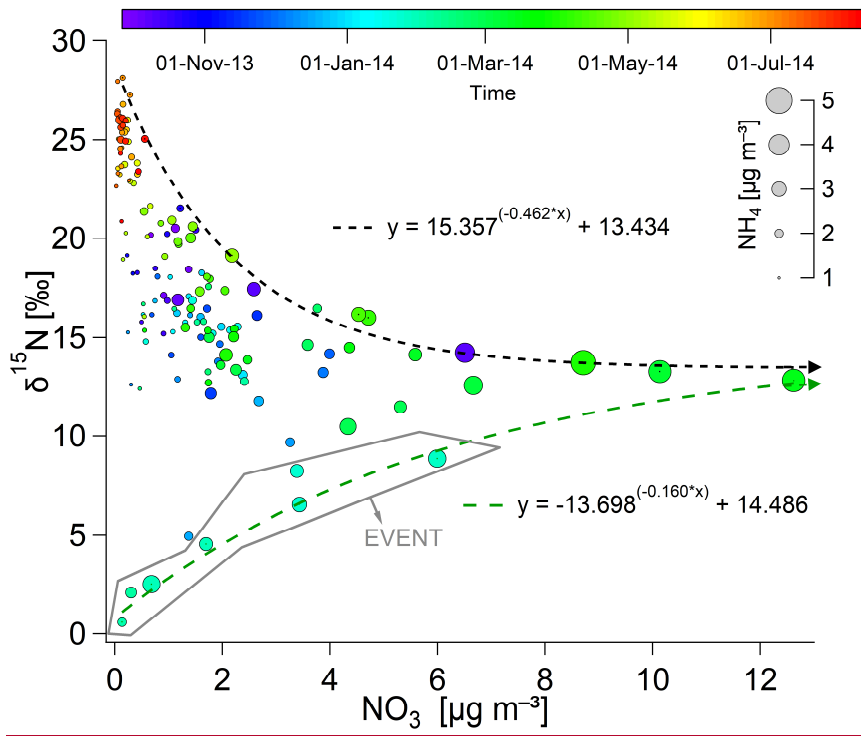

1487  
 1488  
 1489  
 1490  
 1491

Fig. 4: Relationships of  $\delta^{15}\text{N}$  of TN vs.  $\text{NO}_3$  concentrations. The larger circles indicate higher  $\text{NH}_4^+$  concentrations. The color scale reflects the time of sample collection.

Deleted: in

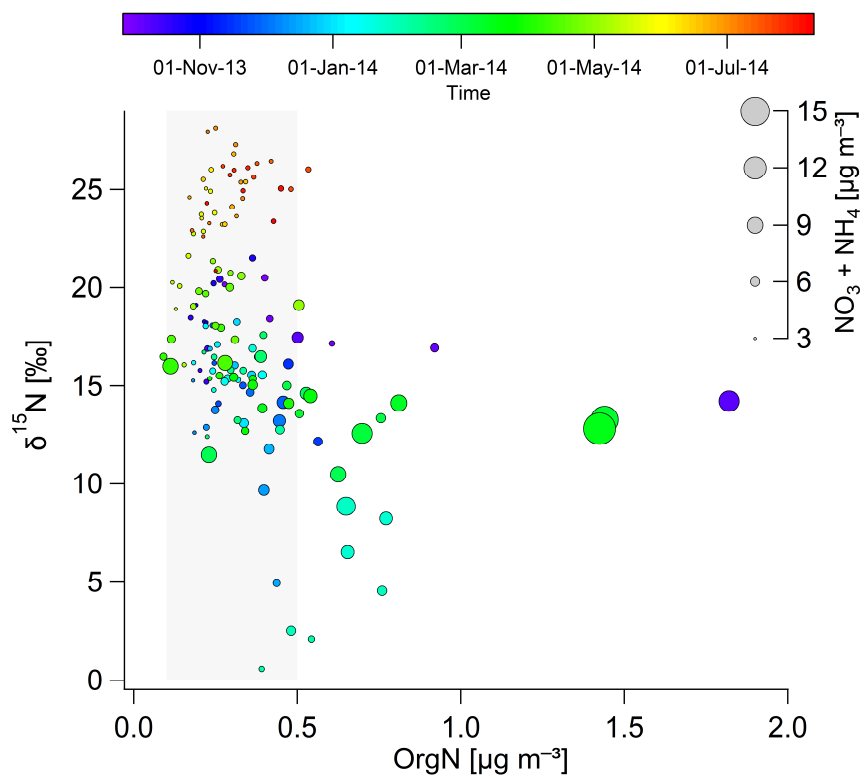

1493  
 1494 Fig. 5: Relationships of  $\delta^{15}\text{N}$  of TN vs. OrgN concentrations. The larger circles indicate higher sums of  
 1495  $\text{NO}_3^- + \text{NH}_4^+$  concentrations. The color scale reflects the time of sample collection, and the highlighted  
 1496 portion is a concentration range between 0.1-0.5  $\mu\text{g m}^{-3}$ .

Deleted: in



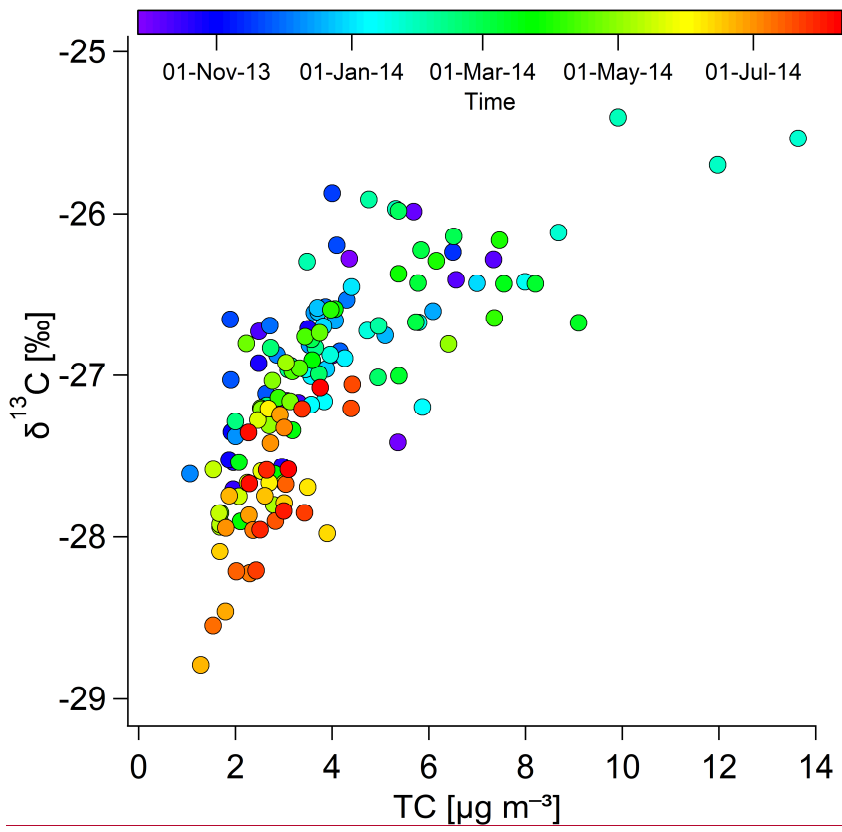

1498  
1499  
1500

Fig. 6: Relationship between TC and  $\delta^{13}\text{C}$ . The color scale reflects the time of sample collection.

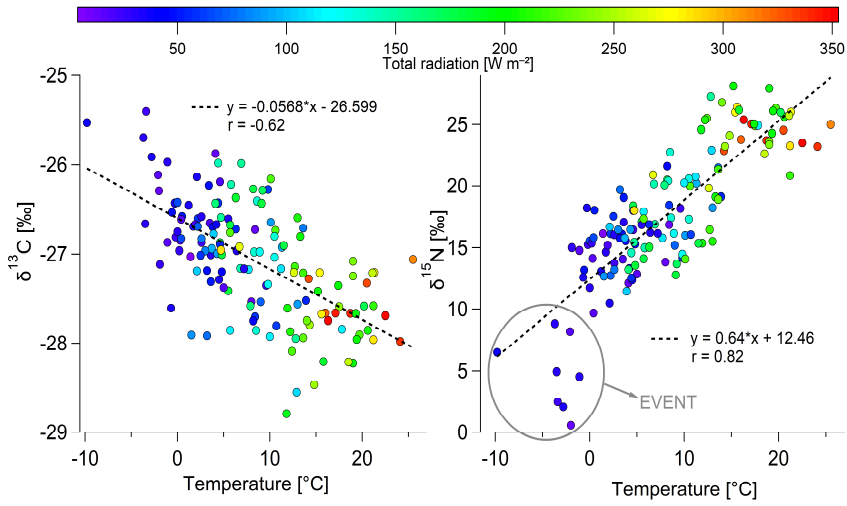

1501

1502 Fig. 7: Relationships between temperature and  $\delta^{13}\text{C}$  of TC (left) and  $\delta^{15}\text{N}$  of TN (right). The color scale  
 1503 reflects the total radiation.

Deleted: in  
 Deleted: in

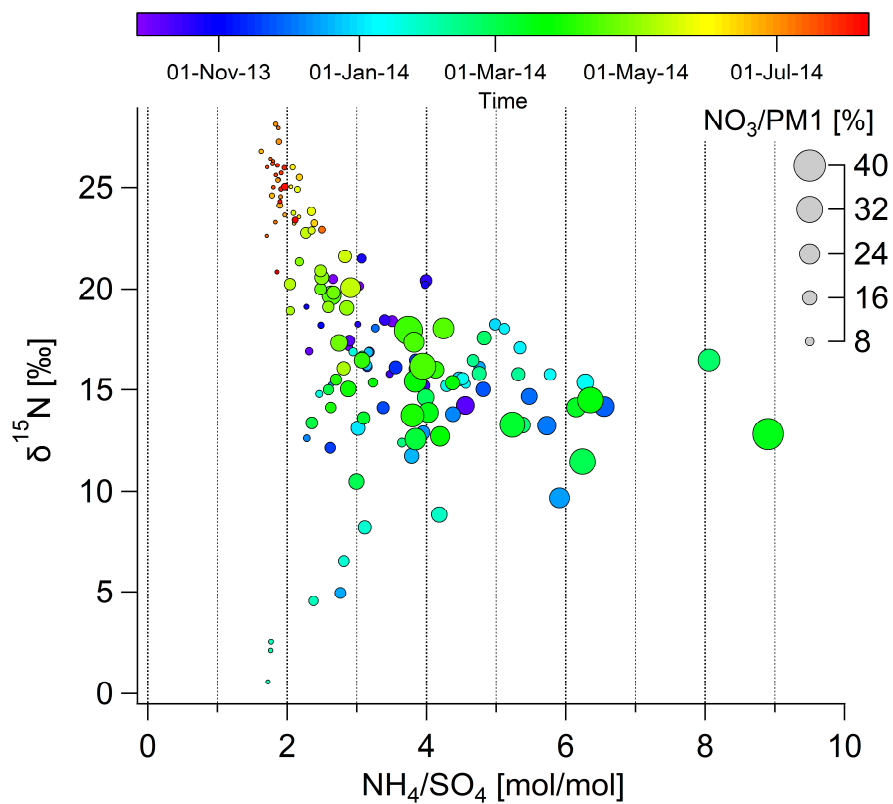

1506

1507 Fig. 8: Relationships between  $\delta^{15}\text{N}$  of TN and molar ratios of  $\text{NH}_4^+/\text{SO}_4^{2-}$  in particles. The larger circle  
 1508 indicates higher nitrate content in PM1. The color scale reflects the time of sample collection.

Deleted: in  
 Deleted: a

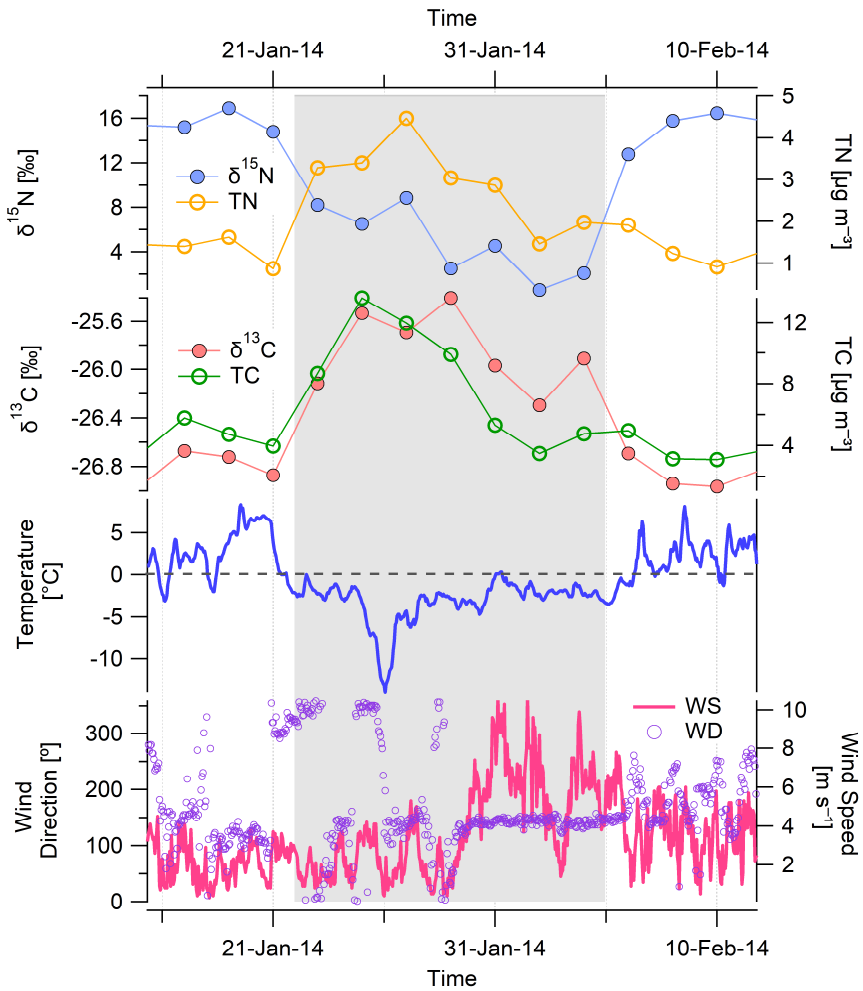

1511  
 1512 Fig. 9: Time series of  $\delta^{15}\text{N}$ , TN,  $\delta^{13}\text{C}$ , TC and meteorological variables (temperature, wind speed and  
 1513 direction, 1 h time resolution) during the *Event*, which is highlighted by the gray color.  
 1514

Deleted: ¶

Deleted: a

NOAA HYSPLIT MODEL  
 Backward trajectories ending at 0600 UTC 05 Feb 14  
 GDAS Meteorological Data

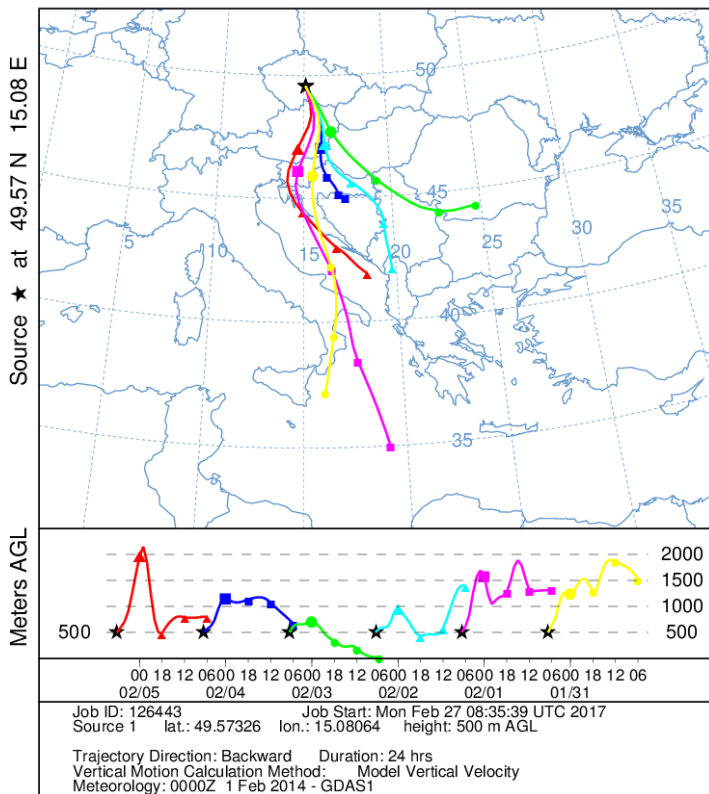

1517  
 1518 Fig. 10: NOAA HYSPLIT (Stein et al., 2015) 24 h backward air mass trajectories at 500 m above  
 1519 ground level for the observation site from 30 Jan until 5 Feb 2014 (right).

**Page 8: [1] Deleted** **Petr Vodicka** **11/01/2019 14:48:00**

), and thus, the final  $\delta^{15}\text{N}$  value in TN can be formulated by the following equation:

**Page 9: [2] Deleted** **Petr Vodicka** **11/01/2019 14:48:00**

formation

**Page 9: [2] Deleted** **Petr Vodicka** **11/01/2019 14:48:00**

formation

**Page 9: [2] Deleted** **Petr Vodicka** **11/01/2019 14:48:00**

formation

**Page 9: [3] Deleted** **Petr Vodicka** **11/01/2019 14:48:00**

show

**Page 9: [3] Deleted** **Petr Vodicka** **11/01/2019 14:48:00**

show

**Page 9: [3] Deleted** **Petr Vodicka** **11/01/2019 14:48:00**

show

**Page 9: [3] Deleted** **Petr Vodicka** **11/01/2019 14:48:00**

show

**Page 9: [3] Deleted** **Petr Vodicka** **11/01/2019 14:48:00**

show

**Page 9: [3] Deleted** **Petr Vodicka** **11/01/2019 14:48:00**

show

**Page 9: [3] Deleted** **Petr Vodicka** **11/01/2019 14:48:00**

show

**Page 9: [3] Deleted** **Petr Vodicka** **11/01/2019 14:48:00**

show

**Page 9: [3] Deleted** **Petr Vodicka** **11/01/2019 14:48:00**

show

**Page 9: [3] Deleted** **Petr Vodicka** **11/01/2019 14:48:00**

show

**Page 9: [3] Deleted** **Petr Vodicka** **11/01/2019 14:48:00**

show

**Page 9: [4] Deleted** **Petr Vodicka** **11/01/2019 14:48:00**

generally

**Page 9: [4] Deleted** Petr Vodicka 11/01/2019 14:48:00

generally

**Page 9: [4] Deleted** Petr Vodicka 11/01/2019 14:48:00

generally

**Page 9: [4] Deleted** Petr Vodicka 11/01/2019 14:48:00

generally

**Page 9: [4] Deleted** Petr Vodicka 11/01/2019 14:48:00

generally

**Page 9: [4] Deleted** Petr Vodicka 11/01/2019 14:48:00

generally

**Page 9: [4] Deleted** Petr Vodicka 11/01/2019 14:48:00

generally

**Page 9: [4] Deleted** Petr Vodicka 11/01/2019 14:48:00

generally

**Page 9: [4] Deleted** Petr Vodicka 11/01/2019 14:48:00

generally

**Page 9: [5] Deleted** Petr Vodicka 11/01/2019 14:48:00

in summer,

**Page 9: [5] Deleted** Petr Vodicka 11/01/2019 14:48:00

in summer,

**Page 9: [5] Deleted** Petr Vodicka 11/01/2019 14:48:00

in summer,

**Page 9: [5] Deleted** Petr Vodicka 11/01/2019 14:48:00

in summer,

**Page 9: [5] Deleted** Petr Vodicka 11/01/2019 14:48:00

in summer,

**Page 9: [5] Deleted** Petr Vodicka 11/01/2019 14:48:00

in summer,

**Page 9: [5] Deleted** Petr Vodicka 11/01/2019 14:48:00

in summer,

**Page 9: [5] Deleted** Petr Vodicka 11/01/2019 14:48:00

in summer,

|                            |                     |                            |
|----------------------------|---------------------|----------------------------|
| <b>Page 9: [5] Deleted</b> | <b>Petr Vodicka</b> | <b>11/01/2019 14:48:00</b> |
|----------------------------|---------------------|----------------------------|

in summer,

|                            |                     |                            |
|----------------------------|---------------------|----------------------------|
| <b>Page 9: [5] Deleted</b> | <b>Petr Vodicka</b> | <b>11/01/2019 14:48:00</b> |
|----------------------------|---------------------|----------------------------|

in summer,

|                            |                     |                            |
|----------------------------|---------------------|----------------------------|
| <b>Page 9: [5] Deleted</b> | <b>Petr Vodicka</b> | <b>11/01/2019 14:48:00</b> |
|----------------------------|---------------------|----------------------------|

in summer,

|                            |                     |                            |
|----------------------------|---------------------|----------------------------|
| <b>Page 9: [5] Deleted</b> | <b>Petr Vodicka</b> | <b>11/01/2019 14:48:00</b> |
|----------------------------|---------------------|----------------------------|

in summer,

|                            |                     |                            |
|----------------------------|---------------------|----------------------------|
| <b>Page 9: [5] Deleted</b> | <b>Petr Vodicka</b> | <b>11/01/2019 14:48:00</b> |
|----------------------------|---------------------|----------------------------|

in summer,

|                            |                     |                            |
|----------------------------|---------------------|----------------------------|
| <b>Page 9: [5] Deleted</b> | <b>Petr Vodicka</b> | <b>11/01/2019 14:48:00</b> |
|----------------------------|---------------------|----------------------------|

in summer,

|                            |                     |                            |
|----------------------------|---------------------|----------------------------|
| <b>Page 9: [5] Deleted</b> | <b>Petr Vodicka</b> | <b>11/01/2019 14:48:00</b> |
|----------------------------|---------------------|----------------------------|

in summer,

|                            |                     |                            |
|----------------------------|---------------------|----------------------------|
| <b>Page 9: [5] Deleted</b> | <b>Petr Vodicka</b> | <b>11/01/2019 14:48:00</b> |
|----------------------------|---------------------|----------------------------|

in summer,

|                            |                     |                            |
|----------------------------|---------------------|----------------------------|
| <b>Page 9: [5] Deleted</b> | <b>Petr Vodicka</b> | <b>11/01/2019 14:48:00</b> |
|----------------------------|---------------------|----------------------------|

in summer,

|                            |                     |                            |
|----------------------------|---------------------|----------------------------|
| <b>Page 9: [5] Deleted</b> | <b>Petr Vodicka</b> | <b>11/01/2019 14:48:00</b> |
|----------------------------|---------------------|----------------------------|

in summer,

|                            |                     |                            |
|----------------------------|---------------------|----------------------------|
| <b>Page 9: [5] Deleted</b> | <b>Petr Vodicka</b> | <b>11/01/2019 14:48:00</b> |
|----------------------------|---------------------|----------------------------|

in summer,

|                            |                     |                            |
|----------------------------|---------------------|----------------------------|
| <b>Page 9: [5] Deleted</b> | <b>Petr Vodicka</b> | <b>11/01/2019 14:48:00</b> |
|----------------------------|---------------------|----------------------------|

in summer,

|                            |                     |                            |
|----------------------------|---------------------|----------------------------|
| <b>Page 9: [5] Deleted</b> | <b>Petr Vodicka</b> | <b>11/01/2019 14:48:00</b> |
|----------------------------|---------------------|----------------------------|

in summer,

|                            |                     |                            |
|----------------------------|---------------------|----------------------------|
| <b>Page 9: [5] Deleted</b> | <b>Petr Vodicka</b> | <b>11/01/2019 14:48:00</b> |
|----------------------------|---------------------|----------------------------|

in summer,

|                            |                     |                            |
|----------------------------|---------------------|----------------------------|
| <b>Page 9: [5] Deleted</b> | <b>Petr Vodicka</b> | <b>11/01/2019 14:48:00</b> |
|----------------------------|---------------------|----------------------------|

in summer,



|                            |                     |                            |
|----------------------------|---------------------|----------------------------|
| <b>Page 9: [5] Deleted</b> | <b>Petr Vodicka</b> | <b>11/01/2019 14:48:00</b> |
|----------------------------|---------------------|----------------------------|

in summer,

|                            |                     |                            |
|----------------------------|---------------------|----------------------------|
| <b>Page 9: [5] Deleted</b> | <b>Petr Vodicka</b> | <b>11/01/2019 14:48:00</b> |
|----------------------------|---------------------|----------------------------|

in summer,

|                            |                     |                            |
|----------------------------|---------------------|----------------------------|
| <b>Page 9: [5] Deleted</b> | <b>Petr Vodicka</b> | <b>11/01/2019 14:48:00</b> |
|----------------------------|---------------------|----------------------------|

in summer,
